# Supplementary material for: Synthesis and study of Au(iii)–indolizine derivatives: turn-on luminescence by photo-induced controlled release
Source: Royal Society of Chemistry journal article supplement (doi:10.1039/c8cc10177a), 2019-01-01
Supplement: c8cc10177a1.pdf [file c8cc10177a1.pdf]

## Synthesis and Study of Au(III)-Indolizine Derivatives: Turn-on Luminescence by Photo-induced Control Release.

### Supporting information

---

#### Table of Content:

|                                                                       |     |
|-----------------------------------------------------------------------|-----|
| General Aspects:                                                      | s1  |
| General Procedure for the Cycloisomerization Substrates Preparation:  | s3  |
| General and Representative Procedure for Cycloisomerization Reaction: | s6  |
| a) General cycloisomerization procedure:                              | s6  |
| b) General work up procedure                                          | s6  |
| c) Representative Procedure by using AuCl <sub>3</sub>                | s6  |
| d) Representative Procedure by using AuCl <b>2a</b>                   | s7  |
| e) Representative procedure by using CuCl <b>2d</b>                   | s7  |
| f) Table for preparation of complexes <b>3</b> and <b>4</b>           | s9  |
| General Procedure for Photo-induced Reductive Elimination Reactions   | s10 |
| Characterization Data                                                 | s11 |
| a) NMR of Product <b>3</b>                                            | s11 |
| b) NMR of Product <b>4</b>                                            | s14 |
| c) NMR of Product <b>5</b>                                            | s16 |
| Selected Structural Information of Isolated Complexes for Comparison  | s19 |
| Absorption spectral changes of <b>3bb</b> and <b>3cb</b>              | s20 |
| UV Spectrum                                                           | s21 |
| Fluorescence Spectrum                                                 | s23 |
| Absorption and Emission Spectral Data of <b>3</b> and <b>5</b>        | s25 |
| Singlet Oxygen Emission Study                                         | s26 |
| Cytotoxicity evaluation of complex <b>3</b> on cancer cell lines      | s27 |

## **General Aspects:**

Unless otherwise indicated, all reactions were performed under a nitrogen atmosphere from which oxygen and moisture were rigidly excluded from reagents and glassware, and all the metal salts were stored in a glovebox and used without further purification:  $\text{AuCl}_3$ ,  $\text{AuBr}_3$  and  $\text{AuCl}$  were purchased from Alfa,  $\text{CuCl}$  and  $\text{CuBr}$  were purchased from J&K or Alfa. Starting materials for cycloisomerization substrate synthesis such as n-Butyllithium, iodomethane, the pyridine and the acetylene derivatives were stored in a refrigerator and used without further purification. THF was dried over NaH before use. Extra Dry DCM was used directly and purchased from J&K.

Analytical thin layer chromatography (TLC) was performed using EM Science silica gel 60 F254 plates. The developed chromatogram was analyzed by UV lamp (254 nm). Purification of product was performed by using Silica Gel (230–400 mesh, 0.040-0.063 mm) coarse fritted glass column.

$^1\text{H}$  and  $^{13}\text{C}$  NMR spectra were recorded on Bruker spectrometers in deuteriated chloroform, acetone or DMSO (400 or 500 MHz for  $^1\text{H}$ , and 100 or 125 MHz for  $^{13}\text{C}$ ). Chemical shifts in  $^1\text{H}$  NMR spectra are reported in ppm on the  $\delta$  scale from an internal standard of TMS. Data are reported as follows: chemical shift, multiplicity (s = singlet, d = doublet, t = triplet, q = quartet, m = multiplet, br = broad), coupling constant in hertz (Hz), and integration. Chemical shifts of  $^{13}\text{C}$  NMR spectra are reported in ppm from the central peak of D6-DMSO ( $\delta$ 39.51 ppm), D6-Acetone, ( $\delta$ 206.68, 29.92 ppm) or  $\text{CDCl}_3$  ( $\delta$ 77.13 ppm) on the  $\delta$  scale.

Absorption spectra were recorded with a Cary 60 UV/Vis absorption spectrophotometer. Fluorescence spectra were recorded with an FS5 fluorescence spectrometer from Edinburgh Instrument<sup>TM</sup> at room temperature. Emission of singlet oxygen were recorded with an FLS 980 fluorescence spectrometer from Edinburgh Instrument<sup>TM</sup> equipped with an NIR-PMT detector and an 850 nm long pass filter in the emission arm. Quartz cuvettes (path length = 1 cm) were used for all spectrophotometric and fluorometric measurements.

High resolution mass spectra (HRMS) were obtained on a Finnigan MAT 95XL GC Mass Spectrometer of the Southern University of Science and Technology.

All crystal data was collected from Bruker D8-Venture X-Ray Spectrometer by Dr. Xiaoyong Chang of the Southern University of Science and Technology.

Cell Cultures: Human A549 (lung), HCT116 (colon) and HepG2 (liver) cancer cells were obtained from American Type Culture Collection (ATCC) and cultured in Dulbecco's modification of Eagle medium (DMEM) supplemented with 10% fetal bovine serum, 100 units/ml penicillin, and 100 mg/ml streptomycin. Cells were cultured at 37°C in an atmosphere of 5% CO<sub>2</sub> and 95% humidity.

Cell proliferation was assessed by MTT [3-(4,5-dimethylthiazol-2-yl)-2,5-diphenyl tetrazolium bromide] assay. Briefly, cells were plated in 96-well plates (2x10<sup>3</sup> cells/well) and then treated with indolizine derivatives ligated Au(III) complexes for 72 h. Afterward, cells were treated with MTT reagent and the absorbance at 570 nm was measured using a microplate reader. The viability of control (untreated cells) was regarded as 100%.

### Procedure for the Cycloisomerization Substrate Preparation:

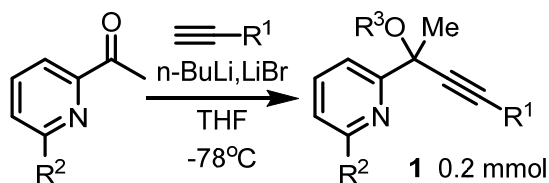

**1a-c** are known compounds and was prepared according to literature procedure.<sup>1,2</sup>

**1a:** *n*-Butyllithium (5.60 mL, 14.0 mmol, 2.5 M in hexanes) was added dropwise to trimethylsilyl acetylene (2.14 mL, 15.0 mmol) in  $\text{Et}_2\text{O}$  (10.0 mL) at  $0^\circ\text{C}$ , and the resulting mixture was stirred for 30 min at this temperature. The lithium acetylide solution was added dropwise to a vigorously stirred mixture of 2-acetylpyridine (1.12 mL, 10.0 mmol) and lithium bromide (2.60 g, 30.0 mmol) in a 1:1 mixture of  $\text{Et}_2\text{O}$  and benzene (total volume = 60.0 mL). The reaction mixture was stirred at ambient temperature for 12 h at which point a saturated  $\text{NH}_4\text{Cl}_{(\text{aq})}$  solution (30 mL) was added to quench the reaction. The aqueous layer was extracted with EA (3 x 40 mL). The organic layers were combined, washed with brine, dried over  $\text{MgSO}_4$  and concentrated under reduced pressure to afford the trimethylsilyl alkyne **1a**, which was purified by silica gel column chromatography.

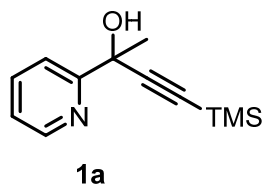

**1a:**  $^1\text{H}$  NMR (400 MHz,  $\text{CDCl}_3$ )  $\delta$  8.50 (s, 1H), 7.74 (s, 1H), 7.61 (d,  $J = 7.9$  Hz, 1H), 7.26 (s, 1H), 5.49 (s, 1H), 1.75 (s, 3H), 0.16 (s, 9H)

<sup>1</sup> Hardin Narayan, Alison R., Sarpong, Richmond, *Organic & Biomolecular Chemistry*, **2012**, 10, 70

<sup>2</sup> Cho, Hanyang, Kim, Ikyon, *Tetrahedron*, **2012**, 68, 5464

**1b-c** are known compound and were prepared as below:

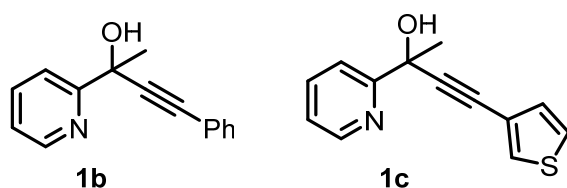

To a stirred solution of terminal alkyne (1.2 equiv) in THF was added *n*-BuLi (1.1 equiv, 1.6 M solution in hexanes) at  $-78\text{ }^{\circ}\text{C}$ . After 5 min, a solution of pyridinyl ketone (1.0 equiv) in THF was added to this mixture at  $-78\text{ }^{\circ}\text{C}$  slowly. After 15 min at  $-78\text{ }^{\circ}\text{C}$ , the reaction mixture was quenched with saturated  $\text{NH}_4\text{Cl}_{(\text{aq})}$ . The reaction mixture was diluted with EA and washed with  $\text{NH}_4\text{Cl}_{(\text{aq})}$ . The organic layer was dried over  $\text{MgSO}_4$  and concentrated in vacuo to give a crude mixture, which was purified by silica gel column chromatography (hexane/EA/DCM) to afford the propargylic alcohol.

**1b**:  $^1\text{H}$  NMR (500 MHz,  $\text{CDCl}_3$ )  $\delta$  8.54 (d,  $J = 4.5\text{ Hz}$ , 1H), 7.77 (td,  $J = 1.5, 8.0\text{ Hz}$ , 1H), 7.69 (d,  $J = 8.0\text{ Hz}$ , 1H), 7.49–7.44 (m, 2H), 7.31–7.24 (m, 4H), 5.62 (s, 1H), 1.87 (s, 3H)

**1c**:  $^1\text{H}$  NMR (500 MHz,  $\text{CDCl}_3$ )  $\delta$  8.54 (d,  $J = 4.5\text{ Hz}$ , 1H), 7.77 (td,  $J = 1.0, 8.0\text{ Hz}$ , 1H), 7.67 (d,  $J = 8.0\text{ Hz}$ , 1H), 7.44 (dd,  $J = 1.0, 3.0\text{ Hz}$ , 1H), 7.27 (dd,  $J = 5.0, 7.0\text{ Hz}$ , 1H), 7.23 (dd,  $J = 3.0, 5.0\text{ Hz}$ , 1H), 7.10 (d,  $J = 5.0\text{ Hz}$ , 1H), 5.61 (s, 1H), 1.86 (s, 3H).

**1d** was prepared according to the above literature procedure for **1b-c** analogously:

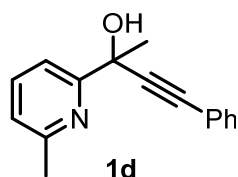

**1d**:  $^1\text{H}$  NMR (500 MHz,  $\text{CDCl}_3$ )  $\delta$  7.68 (t,  $J = 7.7\text{ Hz}$ , 1H), 7.51 – 7.43 (m, 3H), 7.33 – 7.28 (m, 3H), 7.14 (d,  $J = 7.6\text{ Hz}$ , 1H), 6.09 (s, 1H), 2.60 (s, 3H), 1.87 (s, 3H).

$^{13}\text{C}$  NMR (126 MHz,  $\text{CDCl}_3$ )  $\delta$  160.91, 156.31, 137.80, 131.78, 128.31, 128.18, 122.75, 122.29, 117.08, 92.51, 83.39, 68.44, 32.34, 24.15.

HRMS-ESI ( $m/z$ ):  $[\text{M}+\text{H}]^+$  calcd for  $\text{C}_{16}\text{H}_{16}\text{ON}$ : 238.12264; found 238.12209

**1e-f** were prepared by typical alcohol methylation procedure:

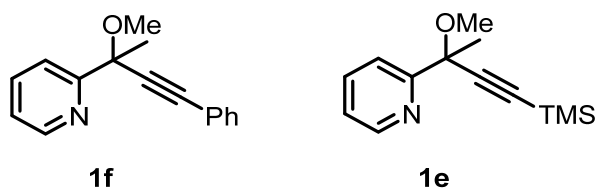

**1e:** A solution of propargylic alcohol **1a** (1.0 equiv) in THF was added NaH (60% in oil, 1.5 equiv) at 0 °C under nitrogen atmosphere. CH<sub>3</sub>I (2.0 equiv) was added at 0 °C and stirred at 0 °C. After 40 mins, the mixture was quenched by NH<sub>4</sub>Cl<sub>(aq)</sub> and extracted by EA. Organic layer was subjected to silica gel column chromatography (hexane/EA = 5:1) to afford the product.

**1e:** <sup>1</sup>H NMR (500 MHz, CDCl<sub>3</sub>) δ 8.68 (d, *J* = 5.4 Hz, 1H), 7.77 – 7.66 (m, 2H), 7.25 (ddd, *J* = 7.1, 4.8, 1.4 Hz, 1H), 3.35 (s, 3H), 1.82 (s, 3H), 0.26 (s, 9H).

<sup>13</sup>C NMR (126 MHz, CDCl<sub>3</sub>) δ 160.42, 149.49, 136.54, 122.70, 121.10, 105.05, 92.22, 52.51, 29.63, -0.02.

HRMS-ESI (*m/z*): [M+H]<sup>+</sup> calcd for C<sub>13</sub>H<sub>20</sub>ONSi: 234.13087; found 234.13043

**1f:** A solution of propargylic alcohol **1b** (1.0 equiv) in THF was added NaH (60% in oil, 1.5 equiv) at 0 °C under nitrogen atmosphere. CH<sub>3</sub>I (3.0 equiv) was added at 0 °C and was allowed to stir at r.t.. After 2 hrs, the mixture was quenched by NH<sub>4</sub>Cl<sub>(aq)</sub> and extracted by EA. Organic layer was subjected to silica gel column chromatography (hexane/EA = 5:1) to afford the product.

**1f:** <sup>1</sup>H NMR (400 MHz, CDCl<sub>3</sub>) δ 8.68 (d, *J* = 4.0 Hz, 1H), 7.79 (d, *J* = 7.9 Hz, 1H), 7.72 (ddd, *J* = 7.7, 7.7, 1.8 Hz, 1H), 7.57 – 7.49 (m, 2H), 7.36 – 7.30 (m, 3H), 7.23 (ddd, *J* = 7.4, 4.8, 1.1 Hz, 1H), 3.39 (s, 3H), 1.91 (s, 4H).

<sup>13</sup>C NMR (101 MHz, CDCl<sub>3</sub>) δ 160.83, 149.47, 136.64, 131.87, 128.52, 128.29, 122.75, 122.59, 121.00, 88.95, 87.40, 77.49, 52.68, 29.68.

HRMS-ESI (*m/z*): [M+H]<sup>+</sup> calcd for C<sub>16</sub>H<sub>16</sub>ON: 238.12264; found 238.12204

## General Procedure for the Cycloisomerization Reactions:

### a) General cycloisomerization procedure:

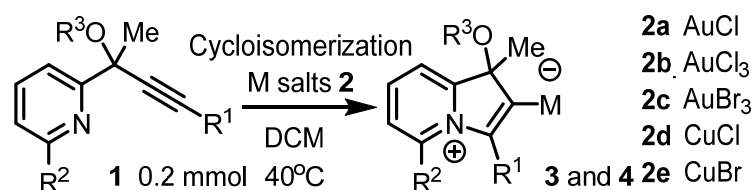

The M salts **2** (1.0 equiv) and **1** (1.0 equiv) were added to a test tube inside the glove box. After sealed with rubber septum and parafilm, the tube was taken out of the glovebox and 1 ml dried DCM was added at bench top under N<sub>2</sub> protection. The reaction was then heated to 40 °C and was stirred for 12 hrs. The desired product **3** and **4** showed low solubility in DCM and would precipitate out gradually during the process. Using a hot plate with effective stirring is therefore recommended.

### b) General work up procedure

The desired product (ppt) was collected by filtration after cooling the reaction mixture to r.t.. It was rinsed further by DCM 5 times (4 mL) before vacuum dried. Preparative TLC was employed for further purification when necessary.

### c) Representative procedure by using AuCl<sub>3</sub>

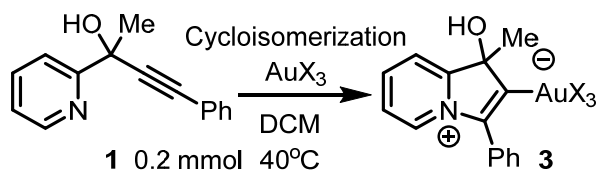

The cycloisomerization substrate **1b** and AuCl<sub>3</sub> **2b** (1.0 equiv, 0.2 mmol each) were added to a test tube inside the glove box. After sealed, 1 ml DCM was added at bench top under N<sub>2</sub> protection. The reaction was then heated to 40 °C and was stirred for 12 hrs. The desired product **3bb** was obtained by following the general work up procedure.

**d) Representative procedure by using AuCl 2a**

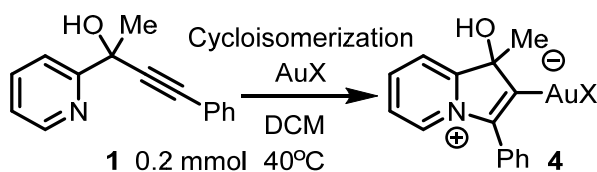

The cycloisomerization substrate **1b** and AuCl **2a** (1.0 equiv, 0.2 mmol each) were added to a test tube inside the glove box. After sealed, 1 ml DCM was added at bench top under N<sub>2</sub> protection. The reaction was then heated to 40 °C and was stirred for 12 hrs. The desired product **4ba** was obtained by following the general work up procedure. The crude product was purified by preparative TLC using 5% DCM in MeOH as eluent.

**e) Representative procedure by using CuCl 2d**

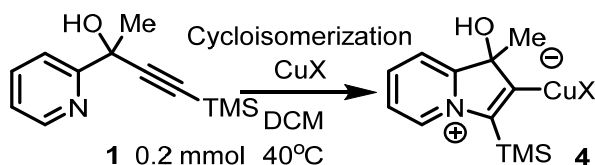

The cycloisomerization substrate **1a** and CuCl **2d** (1.0 equiv, 0.2 mmol each) were added to a test tube inside the glove box. After sealed, 1 ml DCM was added at bench top under N<sub>2</sub> protection. The reaction was then heated to 40 °C and was stirred for 12 hrs. The desired product **4ad** was obtained by following the general work up procedure, except the solvent was removed by trituration first followed by vacuum.

**Table 1** Preparation of complex **3** and **4** by cycloisomerization of **1** and **2**.<sup>[a]</sup>

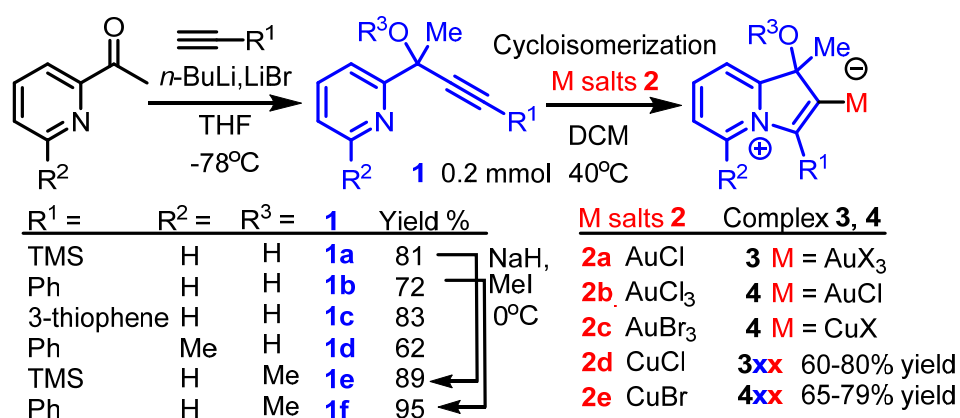

| entry            | alkyne <b>1</b> | M salt <b>2</b> | complex <b>3, 4</b> | Yield <sup>[b]</sup> |
|------------------|-----------------|-----------------|---------------------|----------------------|
| 1                | <b>1a</b>       | <b>2a</b>       | <b>4aa</b>          | 71%                  |
| 2                |                 | <b>2b</b>       | <b>3ab</b>          | 72%                  |
| 3                |                 | <b>2c</b>       | <b>3ac</b>          | 68%                  |
| 4                | <b>1b</b>       | <b>2a</b>       | <b>4ba</b>          | 73%                  |
| 5                |                 | <b>2b</b>       | <b>3bb</b>          | 75%                  |
| 6                |                 | <b>2c</b>       | <b>3bc</b>          | 70%                  |
| 7                | <b>1c</b>       | <b>2a</b>       | <b>4ca</b>          | 67%                  |
| 8 <sup>[c]</sup> |                 | <b>2b</b>       | <b>3cb</b>          | 80%                  |
| 9                | <b>1d</b>       | <b>2b</b>       | <b>3db</b>          | 63%                  |
| 10               | <b>1e</b>       | <b>2b</b>       | <b>3eb</b>          | 75%                  |
| 11               | <b>1f</b>       |                 | <b>3fb</b>          | 73%                  |
| 12               | <b>1a</b>       | <b>2d</b>       | <b>4ad</b>          | 79%                  |
| 13               |                 | <b>2e</b>       | <b>4ae</b>          | 65%                  |

[a] see s7-8 for details of the experimental procedure. [b] Isolated yield via chromatography or recrystallization; characterized by NMR spectroscopy and HRMS. [c] conducted at rt.

Highly substituted **3** with different functional groups (R<sup>1</sup>, R<sup>2</sup>, and R<sup>3</sup>), such as silyl, aryl, heteroaryl, methoxy, and alkyl, were obtained in good yield (entry 2, 5, and 8–11). The high generality of this approach is notable because it offers opportunities to both fine tune the photophysical properties of **3** and develop catalysts similar to NHC systems. Moreover, salts like **2a** and **c–e** were found to be compatible with the conditions (AuCl, AuBr<sub>3</sub>, entry 1, 3, 4, 6, 7; CuCl, CuBr, entry 12 and 13), giving the corresponding Au(III) complexes **3**, Au(I) and Cu(I) complexes **4**. It allowed us to compare their properties as a function of M center, oxidation state, and counter ion later on.

### General Procedure for Photo-induced Reductive Elimination Reactions:

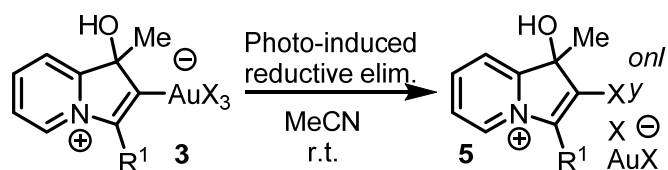

A stirring solution of **3bb** (5 mg in 10 ml MeCN, see maintext for structure) was exposed to photo-excitation (280-330 nm) for 5-10 mins. The desired reductive elimination product **5bb** was obtained in quantitative yield and no corresponding indolizine-AuCl product was observed. The product structure was determined and characterization by  $^1\text{H}$ ,  $^{13}\text{C}$  NMR, HRMS. The characteristic vinyl halides C peaks were found in  $^{13}\text{C}$  NMR.

| 5          | Yield        |
|------------|--------------|
| <b>5bc</b> | quantitative |
| <b>5ab</b> | 92%          |
| <b>5bb</b> | quantitative |
| <b>5cb</b> | quantitative |
| <b>5db</b> | 97%          |
| <b>5fb</b> | quantitative |
| <b>5ac</b> | quantitative |

## Characterization Data:

### (a) NMR of Product 3

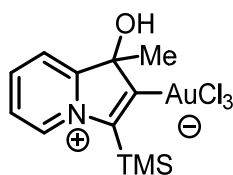

$^1\text{H}$  NMR (400 MHz, D6-Acetone)  $\delta$  9.10 (d,  $J$  = 6.1 Hz, 1H), 8.58 (ddd,  $J$  = 7.8, 7.8, 1.1 Hz, 1H), 8.36 (d,  $J$  = 7.8 Hz, 1H), 8.15 (dd,  $J$  = 6.9, 6.9 Hz, 1H), 4.79 (s, 1H), 1.82 (s, 3H), 0.70 (s, 9H).

$^{13}\text{C}$  NMR (126 MHz, D6-Acetone)  $\delta$  162.34, 160.11, 143.29, 139.33, 137.01, 127.42, 122.76, 84.58, 25.44, -0.80.

HRMS-ESI ( $m/z$ ):  $[\text{M}-\text{Cl}]^+$  calcd for  $\text{C}_{12}\text{H}_{17}\text{ONAuCl}_2\text{Si}$ : 486.01220; found 486.01022

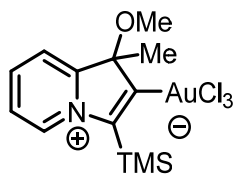

$^1\text{H}$  NMR (400 MHz, D6-Acetone)  $\delta$  9.20 (d,  $J$  = 6.1 Hz, 1H), 8.66 (ddd,  $J$  = 7.8, 7.8, 1.0 Hz, 1H), 8.36 (d,  $J$  = 7.8 Hz, 1H), 8.24 (dd,  $J$  = 6.9, 6.9 Hz, 1H), 3.09 (s, 3H), 1.81 (s, 3H), 0.75 – 0.72 (m, 9H).

$^{13}\text{C}$  NMR (101 MHz, D6-Acetone)  $\delta$  158.79, 158.32, 143.31, 142.37, 138.16, 128.16, 123.44, 90.77, 25.55, -0.60.

HRMS-ESI ( $m/z$ ):  $[\text{M}-\text{Cl}]^+$  calcd for  $\text{C}_{13}\text{H}_{19}\text{ONAuCl}_2\text{Si}$ : 500.02730; found 500.02662

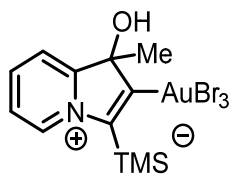

$^1\text{H}$  NMR (400 MHz, D6-Acetone)  $\delta$  9.08 (d,  $J$  = 6.1 Hz, 1H), 8.55 (ddd,  $J$  = 7.8, 7.8, 1.0 Hz, 1H), 8.36 (d,  $J$  = 7.8 Hz, 1H), 8.15 (dd,  $J$  = 6.9, 6.9 Hz, 1H), 4.67 (s, 1H), 1.84 (s, 3H), 0.68 (d,  $J$  = 3.3 Hz, 9H).

$^{13}\text{C}$  NMR (126 MHz, D6-Acetone)  $\delta$  159.80, 143.07, 139.53, 136.81, 127.29, 122.73, 84.34, 26.74, -0.74.

HRMS-ESI ( $m/z$ ):  $[\text{M}-\text{Br}]^+$  calcd for  $\text{C}_{12}\text{H}_{17}\text{ONAuBr}_2\text{Si}$ : 573.91117; found 573.90918

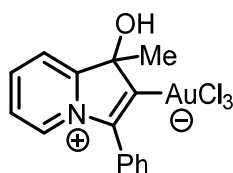

$^1\text{H}$  NMR (500 MHz, D6-DMSO)  $\delta$  8.54 (d,  $J$  = 6.1 Hz, 1H), 8.50 (ddd,  $J$  = 7.8, 7.8, 1.2 Hz, 1H), 8.36 (d,  $J$  = 7.8 Hz, 1H), 7.93 (ddd,  $J$  = 7.6, 6.2, 1.4 Hz, 1H), 7.78 (d,  $J$  = 7.3 Hz, 2H), 7.71 – 7.61 (m, 3H), 6.40 (s, 1H), 1.79 (s, 3H).

$^{13}\text{C}$  NMR (126 MHz, D6-DMSO)  $\delta$  161.51, 145.71, 144.31, 136.02, 135.21, 131.04, 130.87, 129.82, 127.56, 127.46, 122.96, 82.74, 26.16.

HRMS-ESI ( $m/z$ ):  $[\text{M}+\text{NH}_4]^+$  calcd for  $\text{C}_{15}\text{H}_{17}\text{ON}_2\text{AuCl}_3$ : 543.00665; found 543.00671

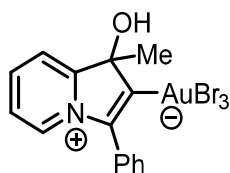

$^1\text{H}$  NMR (400 MHz, D6-DMSO)  $\delta$  8.48 (m, 2H), 8.37 (d,  $J$  = 7.7 Hz, 1H), 7.92 (ddd,  $J$  = 7.6, 6.1, 1.4 Hz, 1H), 7.81 – 7.76 (m, 2H), 7.69 – 7.62 (m, 3H), 6.33 (s, 1H), 1.82 (s, 3H).

$^{13}\text{C}$  NMR (126 MHz, D6-DMSO)  $\delta$  161.69, 145.52, 144.11, 135.82, 134.99, 130.96, 130.94, 129.73, 127.77, 127.38, 122.99, 82.59, 27.31.

HRMS-ESI ( $m/z$ ):  $[\text{M}+\text{Br}]^-$  calcd for  $\text{C}_{15}\text{H}_{13}\text{ONAuBr}_4$ : 735.74061; found 735.74072

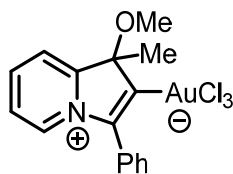

$^1\text{H}$  NMR (400 MHz, D6-DMSO)  $\delta$  8.63 (d,  $J$  = 6.1 Hz, 1H), 8.57 (ddd,  $J$  = 7.8, 7.8, 1.2 Hz, 1H), 8.42 (d,  $J$  = 8.0 Hz, 1H), 8.00 (ddd,  $J$  = 7.6, 6.1, 1.3 Hz, 1H), 7.85 – 7.81 (m, 2H), 7.70 – 7.65 (m, 3H), 5.76 (s, 1H), 3.14 (s, 3H), 1.84 (s, 3H).

$^{13}\text{C}$  NMR (126 MHz, D6-DMSO)  $\delta$  157.38, 144.53, 141.94, 139.45, 136.88, 131.24, 131.08, 129.77, 128.14, 127.43, 123.46, 88.87, 54.66, 25.63.

HRMS-ESI ( $m/z$ ):  $[\text{M}+\text{H}]^+$  calcd for  $\text{C}_{16}\text{H}_{16}\text{ONAuCl}_3$ : 539.9968; found 539.9971

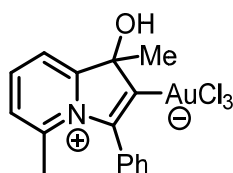

$^1\text{H}$  NMR (500 MHz, D6-DMSO)  $\delta$  8.33 (dd,  $J$  = 7.8, 7.8 Hz, 1H), 8.16 (d,  $J$  = 7.7 Hz, 1H), 7.76 (d,  $J$  = 7.9 Hz, 1H), 7.68 (d,  $J$  = 7.0 Hz, 1H), 7.65 – 7.54 (m, 4H), 6.36 (s, 1H), 2.06 (s, 3H), 1.77 (s, 3H).

$^{13}\text{C}$  NMR (126 MHz, D6-DMSO)  $\delta$  163.24, 150.22, 147.12, 143.47, 137.39, 132.24, 131.95, 131.76, 130.74, 130.51, 129.15, 129.00, 120.78, 81.70, 26.80, 21.94.

HRMS-ESI ( $m/z$ ):  $[\text{M}-\text{H}]^-$  calcd for  $\text{C}_{16}\text{H}_{14}\text{ONAuCl}_3$ : 537.98120; found 537.98181

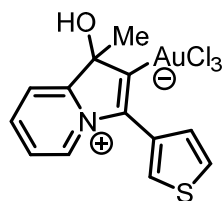

$^1\text{H}$  NMR (400 MHz, D6-DMSO)  $\delta$  8.70 (d,  $J$  = 6.1 Hz, 1H), 8.51 (ddd,  $J$  = 7.7, 7.7, 1.1 Hz, 1H), 8.35 (d,  $J$  = 7.7 Hz, 1H), 8.16 (dd,  $J$  = 2.9, 1.2 Hz, 1H), 7.97 (ddd,  $J$  = 7.6, 6.1, 1.3 Hz, 1H), 7.92 (dd,  $J$  = 5.0, 2.9 Hz, 1H), 7.58 (dd,  $J$  = 5.0, 1.2 Hz, 1H), 6.41 (s, 1H), 1.77 (s, 3H).

$^{13}\text{C}$  NMR (101 MHz, D6-DMSO)  $\delta$  161.38, 145.82, 144.37, 135.39, 132.00, 130.33, 128.81, 128.76, 127.50, 127.46, 122.91, 82.54, 26.15.

HRMS-ESI ( $m/z$ ):  $[\text{M}-\text{H}]^-$  calcd for  $\text{C}_{13}\text{H}_{10}\text{ONAuCl}_3\text{S}$ : 529.9209; found 529.9205.

(b) NMR of Product 4

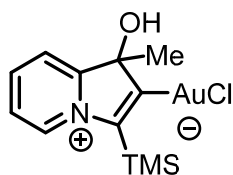

$^1\text{H}$  NMR (500 MHz, D6-Acetone)  $\delta$  8.91 (d,  $J$  = 6.1 Hz, 1H), 8.42 (ddd,  $J$  = 7.7, 7.7, 1.2 Hz, 1H), 8.19 (d,  $J$  = 7.7 Hz, 1H), 8.01 (dd,  $J$  = 6.9, 6.9 Hz, 1H), 4.96 (s, 1H), 1.61 (s, 3H), 0.58 (s, 9H).

$^{13}\text{C}$  NMR (126 MHz, D6-Acetone)  $\delta$  184.64, 163.43, 142.16, 140.83, 135.52 – 134.96, 126.79, 122.27, 87.80, 26.37, 0.02.

HRMS-ESI ( $m/z$ ):  $[\text{M}-\text{Cl}]^+$  calcd for  $\text{C}_{12}\text{H}_{17}\text{ONaAuSi}$ : 416.07394; found 416.07223

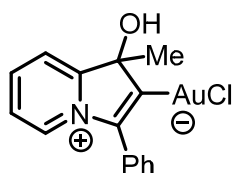

$^1\text{H}$  NMR (400 MHz, D6-DMSO)  $\delta$  8.53 (d,  $J$  = 6.1 Hz, 1H), 8.39 (dd,  $J$  = 7.7, 7.7 Hz, 1H), 8.24 (d,  $J$  = 7.7 Hz, 1H), 7.85 (dd,  $J$  = 6.9, 6.9 Hz, 1H), 7.76 – 7.69 (m, 2H), 7.60 – 7.52 (m, 3H), 6.08 (s, 1H), 1.59 (s, 3H).

$^{13}\text{C}$  NMR (101 MHz, D6-DMSO)  $\delta$  168.63, 163.39, 142.11, 140.16, 133.52, 131.15, 130.41, 129.62, 129.35, 127.10, 122.53, 85.21, 26.58.

HRMS-ESI ( $m/z$ ):  $[\text{M}-\text{H}]^-$  calcd for  $\text{C}_{15}\text{H}_{12}\text{ONaAuCl}$ : 454.02784; found 454.02795

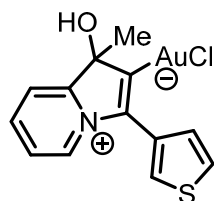

$^1\text{H}$  NMR (400 MHz, D6-DMSO)  $\delta$  8.68 (d,  $J$  = 6.1 Hz, 1H), 8.39 (dd,  $J$  = 7.7, 7.7 Hz, 1H), 8.22 (d,  $J$  = 7.7 Hz, 1H), 8.00 (d,  $J$  = 1.8 Hz, 1H), 7.89 (dd,  $J$  = 6.5, 6.5 Hz, 1H), 7.77 (dd,  $J$  = 4.9, 2.9 Hz, 1H), 7.56 – 7.52 (m, 1H), 6.04 (s, 1H), 1.58 (s, 3H).

$^{13}\text{C}$  NMR (126 MHz, D6-DMSO)  $\delta$  168.71, 163.20, 142.17, 135.79, 133.70, 131.28, 129.29, 127.41, 127.15, 122.43, 85.00, 26.56.

HRMS-ESI ( $m/z$ ):  $[\text{M}-\text{H}]^-$  calcd for  $\text{C}_{13}\text{H}_{11}\text{ONaAuClS}$ : 459.9843 found 459.9842

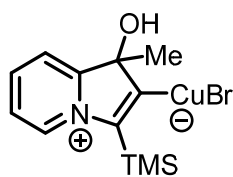

$^1\text{H}$  NMR (500 MHz, D6- Acetone)  $\delta$  8.55 (d,  $J$  = 4.8 Hz, 1H), 8.18 (ddd,  $J$  = 7.8, 7.8, 1.7 Hz, 1H), 7.87 (d,  $J$  = 8.1 Hz, 1H), 7.67 (ddd,  $J$  = 7.6, 5.2, 1.2 Hz, 1H), 6.12 (s, 1H), 1.90 (s, 3H), 0.37 (s, 9H).

$^{13}\text{C}$  NMR (126 MHz, D6- Acetone)  $\delta$  167.29, 147.62, 140.19, 125.07, 121.82, 111.68, 96.04, 77.19, 31.44, -0.91.

HRMS-ESI ( $m/z$ ):  $[\text{M-Br}]^+$  calcd for  $\text{C}_{12}\text{H}_{17}\text{ONCuSi}$ : 282.03699; found 282.03650

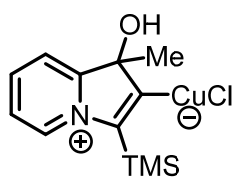

$^1\text{H}$  NMR (500 MHz, D6-Acetone)  $\delta$  8.50 (d,  $J$  = 4.8 Hz, 1H), 8.15 (ddd,  $J$  = 7.8, 7.8, 1.4 Hz, 1H), 7.85 (d,  $J$  = 8.0 Hz, 1H), 7.63 (ddd,  $J$  = 7.5, 5.2, 1.2 Hz, 1H), 6.10 (s, 1H), 1.87 (s, 3H), 0.33 (s, 9H).

$^{13}\text{C}$  NMR (126 MHz, D6-Acetone)  $\delta$  168.97, 149.17, 142.01, 126.83, 123.50, 112.90, 97.55, 78.85, 33.28, 0.90.

HRMS-ESI ( $m/z$ ):  $[\text{M-Cl}]^+$  calcd for  $\text{C}_{12}\text{H}_{17}\text{ONCuSi}$ : 282.03699; found 282.03641

### (c) NMR of Product 5

Structural assignment of **5** was done by NMR, HRMS and comparison of the relevant species reported in the literature: This included the spectroscopic comparison with the corresponding organometallic Au(I) species isolated as shown in the above, as well as non-organometallic species like the 2-halobenzimidazole<sup>3</sup>, 2-haloindene<sup>4</sup> and conjugated indolizine<sup>5</sup> derivatives.

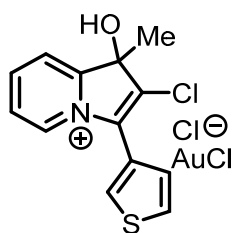

<sup>1</sup>H NMR (500 MHz, D<sub>6</sub>-DMSO)  $\delta$  8.88 (d,  $J$  = 6.1 Hz, 1H), 8.70 (dd,  $J$  = 7.8, 7.8 Hz, 1H), 8.49 (d,  $J$  = 7.8 Hz, 1H), 8.26 (dd,  $J$  = 3.0, 1.5 Hz, 1H), 8.10 (dd,  $J$  = 7.0, 7.0 Hz, 1H), 7.98 (d,  $J$  = 3.3 Hz, 1H), 7.48 (d,  $J$  = 5.0 Hz, 1H), 7.07 (s, 1H), 1.75 (s, 3H).

<sup>13</sup>C NMR (126 MHz, D<sub>6</sub>-DMSO)  $\delta$  157.94, 146.31, 138.37, 137.24, 133.23, 132.39, 129.41, 128.29, 128.12, 123.34, 122.80, 79.33, 22.42.

HRMS-ESI ( $m/z$ ): [M-AuCl<sub>2</sub>]<sup>+</sup> calcd for C<sub>13</sub>H<sub>11</sub>ONClS: 264.0244; found 264.0243

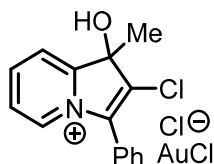

<sup>1</sup>H NMR (500 MHz, D<sub>6</sub>-DMSO)  $\delta$  8.75 (d,  $J$  = 6.1 Hz, 1H), 8.71 (dd,  $J$  = 7.8, 7.8 Hz, 1H), 8.51 (d,  $J$  = 7.9 Hz, 1H), 8.06 (t,  $J$  = 6.9 Hz, 1H), 7.71-7.64 (m, 5H), 7.03 (s, 1H), 1.77 (s, 3H).

<sup>13</sup>C NMR (126 MHz, D<sub>6</sub>-DMSO)  $\delta$  158.10, 146.38, 138.65, 137.14, 137.07, 132.24, 130.91, 130.18, 128.18, 123.46, 123.36, 79.53, 22.33.

HRMS-ESI ( $m/z$ ): [M-AuCl<sub>2</sub>]<sup>+</sup> calcd for C<sub>15</sub>H<sub>13</sub>ONCl: 258.0680; found 258.0675.

<sup>3</sup> Galy, J.-P.; Hanoun, J.-P.; Pique, V.; Jagerovic, N.; Eguero, J. J. *Heterocyclic Chem.* **1997**, *34*, 1781.

<sup>4</sup> a) Anke, L.; Weyerstahl, P. *Chemische Berichte* **1985**, *118*, 613; b) Schlegel, G.; Schaefer, H. J. *Chemische Berichte* **1983**, *116*, 960.

<sup>5</sup> For 1-haloindolizine: a) Yang, Y.; Kuang, C.; Jin, H.; Yang, Q. *Synthesis* **2011**, 3447; For simple indolizine: b) Chernyak, D.; Gadamssetty, S. B.; Gevorgyan, V. *Org. Letts.* **2008**, *10*, 2307.

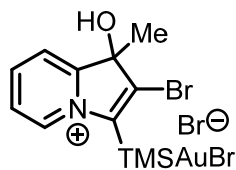

$^1\text{H}$  NMR (500 MHz, D6-Acetone)  $\delta$  9.27 (d,  $J$  = 6.1 Hz, 1H), 8.77 (dd,  $J$  = 7.8, 7.8 Hz, 1H), 8.52 (d,  $J$  = 7.8 Hz, 1H), 8.27 (dd,  $J$  = 7.1, 7.1 Hz, 1H), 6.01 (s, 1H), 1.78 (s, 3H), 0.68 (s, 10H).

$^{13}\text{C}$  NMR (126 MHz, D6-Acetone)  $\delta$  159.56, 145.38, 145.14, 142.57, 139.06, 128.12, 123.51, 23.04, -1.19.

HRMS-ESI ( $m/z$ ):  $[\text{M-AuBr}_2]^+$  calcd for  $\text{C}_{12}\text{H}_{17}\text{ONBrSi}$ : 298.02573; found 298.02542

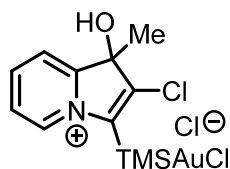

$^1\text{H}$  NMR (500 MHz, D6-Acetone)  $\delta$  9.25 (d,  $J$  = 6.2 Hz, 1H), 8.77 (ddd,  $J$  = 7.9, 7.9, 1.2 Hz, 1H), 8.51 (d,  $J$  = 7.9 Hz, 1H), 8.28 (ddd,  $J$  = 7.7, 6.1, 1.4 Hz, 1H), 1.82 (d,  $J$  = 1.7 Hz, 3H), 0.66 (s, 9H).

$^{13}\text{C}$  NMR (126 MHz, D6-Acetone)  $\delta$  158.93, 153.27, 145.28, 140.40, 139.29, 128.21, 123.39, 80.97, 22.14, -1.62.

HRMS-ESI ( $m/z$ ):  $[\text{M-AuCl}_2]^+$  calcd for  $\text{C}_{12}\text{H}_{17}\text{ONClSi}$ : 254.07624; found 254.07584

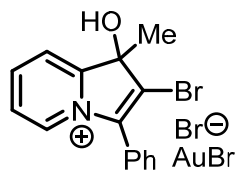

$^1\text{H}$  NMR (500 MHz, D6-DMSO)  $\delta$  8.72 – 8.67 (m, 2H), 8.51 (d,  $J$  = 7.8 Hz, 1H), 8.04 (dd,  $J$  = 7.7, 6.0 Hz, 1H), 7.71-7.64 (m, 5H), 1.74 (s, 3H).

$^{13}\text{C}$  NMR (126 MHz, D6-DMSO)  $\delta$  158.92, 146.06, 139.04, 136.88, 132.10, 131.52, 130.90, 130.11, 128.11, 124.35, 123.53, 80.51, 23.12.

HRMS-ESI ( $m/z$ ):  $[\text{M-AuBr}_2]^+$  calcd for  $\text{C}_{15}\text{H}_{13}\text{ONBr}$ : 202.01750; found 202.01758.

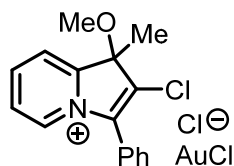

$^1\text{H}$  NMR (500 MHz, D<sub>6</sub>-DMSO)  $\delta$  8.86 (d,  $J$  = 6.1 Hz, 1H), 8.76 (dd,  $J$  = 7.8, 7.8 Hz, 1H), 8.55 (d,  $J$  = 7.8 Hz, 1H), 8.14 (dd,  $J$  = 7.0, 7.0 Hz, 1H), 7.83 – 7.78 (m, 2H), 7.77 – 7.71 (m, 3H), 3.08 (s, 3H), 1.80 (s, 3H).

$^{13}\text{C}$  NMR (126 MHz, D<sub>6</sub>-DMSO)  $\delta$  154.26, 146.45, 139.98, 138.72, 134.76, 132.37, 131.13, 130.01, 128.72, 123.91, 123.12, 85.48, 53.80, 22.11.

HRMS-ESI ( $m/z$ ):  $[\text{M}-\text{AuCl}_2]^+$  calcd for  $\text{C}_{16}\text{H}_{15}\text{ONCl}$ : 272.08367; found 272.08267

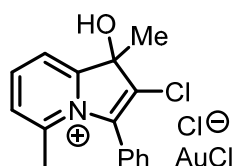

$^1\text{H}$  NMR (500 MHz, D<sub>6</sub>-DMSO)  $\delta$  8.54 (dd,  $J$  = 7.9, 7.9 Hz, 1H), 8.32 (d,  $J$  = 7.8 Hz, 1H), 7.91 (d,  $J$  = 7.9 Hz, 1H), 7.72 – 7.59 (m, 5H), 7.04 (s, 1H), 2.15 (s, 3H), 1.75 (s, 3H).

$^{13}\text{C}$  NMR (126 MHz, DMSO)  $\delta$  159.84, 151.96, 145.24, 140.84, 139.02, 131.80, 131.18, 131.07, 131.04, 129.85, 129.72, 127.97, 121.25, 78.27, 23.05, 22.14.

HRMS-ESI ( $m/z$ ):  $[\text{M}-\text{AuCl}_2]^+$  calcd for  $\text{C}_{16}\text{H}_{15}\text{ONCl}$ : 272.08367; found 272.08279

### Selected Structural Information of Isolated Complexes

Selected bond lengths (Å) and angles (deg) of **3ab**, **3bb**, **3cb**, **3fb** and **3bc**, and the  $^{13}\text{C}$  NMR of the Au-C (ppm).

| entry                                                                                                     | 1                                                | 2                                | 3                                | 4                                | 5                                |
|-----------------------------------------------------------------------------------------------------------|--------------------------------------------------|----------------------------------|----------------------------------|----------------------------------|----------------------------------|
| Complex <b>3</b>                                                                                          | <b>3ab</b>                                       | <b>3bb</b>                       | <b>3cb</b>                       | <b>3fb</b>                       | <b>3bc</b>                       |
| Dihedral angle of R <sup>1</sup> and core                                                                 | n.a.                                             | 54.53                            | 40.48                            | 52.76                            | 53.63                            |
| Au-C                                                                                                      | 2.0053                                           | 1.9949                           | 1.9935                           | 2.0017                           | 2.030                            |
| Au-X <sub>trans</sub>                                                                                     | 2.3631                                           | 2.3565                           | 2.3561                           | 2.3372                           | 2.4753                           |
| Au-X <sub>cis</sub>                                                                                       | 2.2871<br>2.2911                                 | 2.2802<br>2.2841                 | 2.2961<br>2.2862                 | 2.2932<br>2.2842                 | 2.4084<br>2.4224                 |
| 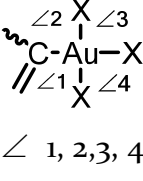<br>$\angle 1, 2, 3, 4$ | 1 = 85.40<br>2 = 91.35<br>3 = 92.78<br>4 = 90.67 | 87.27<br>90.34<br>91.60<br>90.86 | 86.77<br>90.47<br>91.50<br>91.12 | 88.82<br>90.22<br>89.38<br>91.61 | 86.99<br>91.09<br>91.26<br>90.85 |
| Length of C=C                                                                                             | 1.337                                            | 1.329                            | 1.329                            | 1.329                            | 1.270                            |
| $^{13}\text{C}$ NMR at Au-C                                                                               | 160.11                                           | 145.70                           | 145.82                           | 144.53                           | 145.52                           |

### Absorption spectral changes of 3bb and 3cb

The absorption spectral changes of **3bb** (top,  $R^1 = \text{Ph}$ ) and **3cb** (bottom,  $R^1 = \text{thiophen}$ ) upon the irradiation of UV light (280 nm).

Inserts show the absorbance change of selected wavelength upon different irradiation duration.

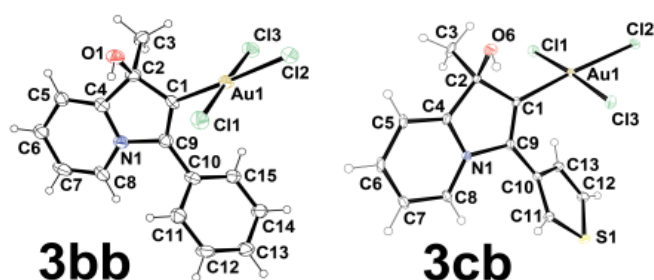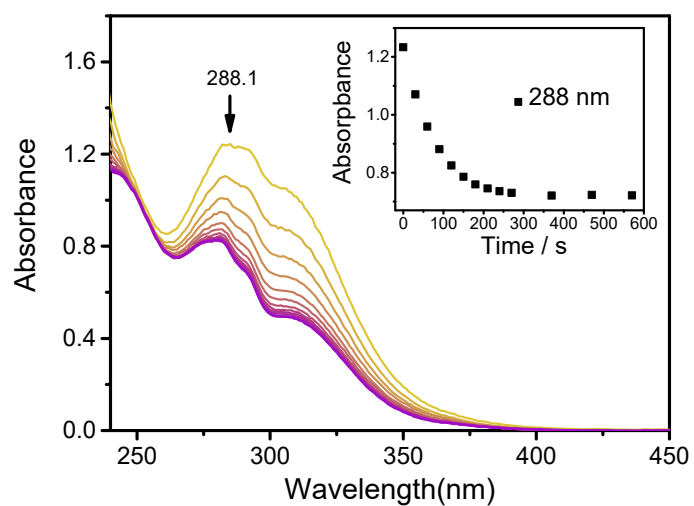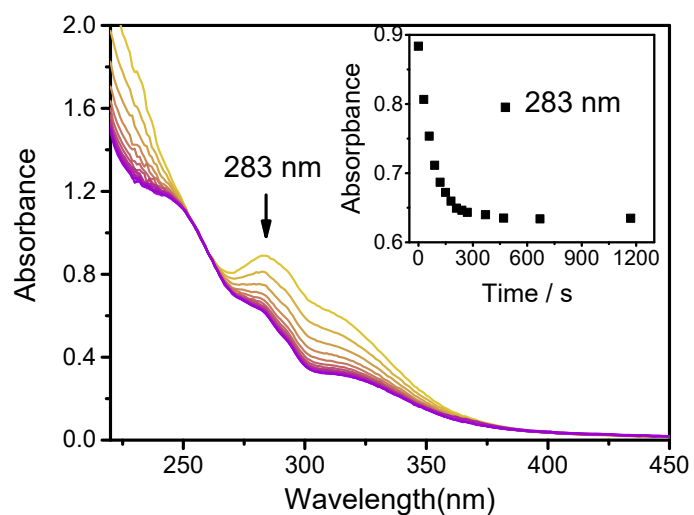

## UV spectrum:

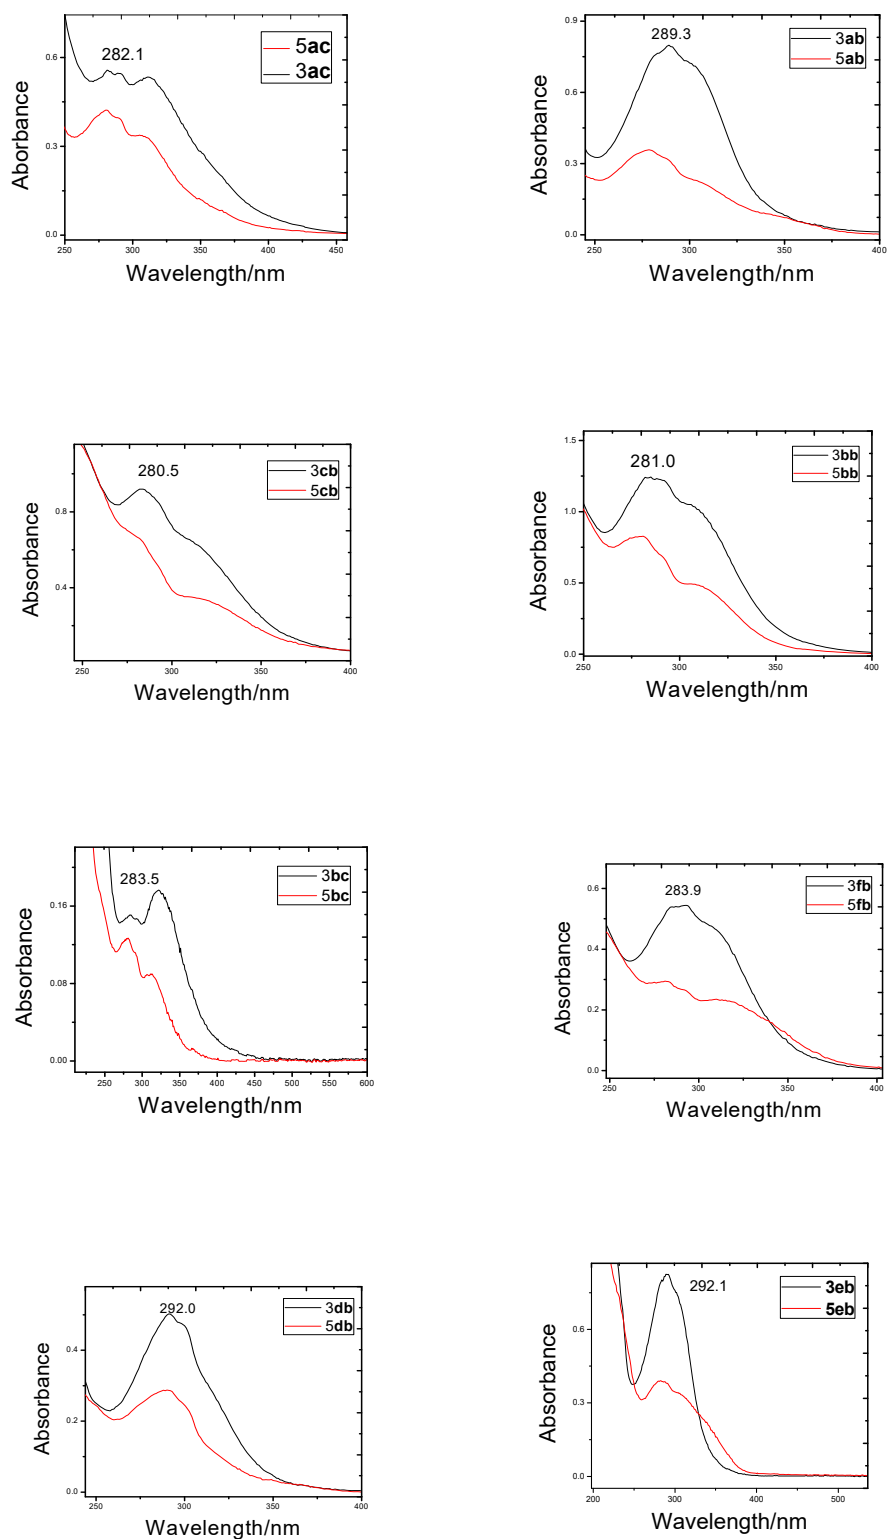

**Figure 1:** UV abs Comparisons of product 3 and product 5

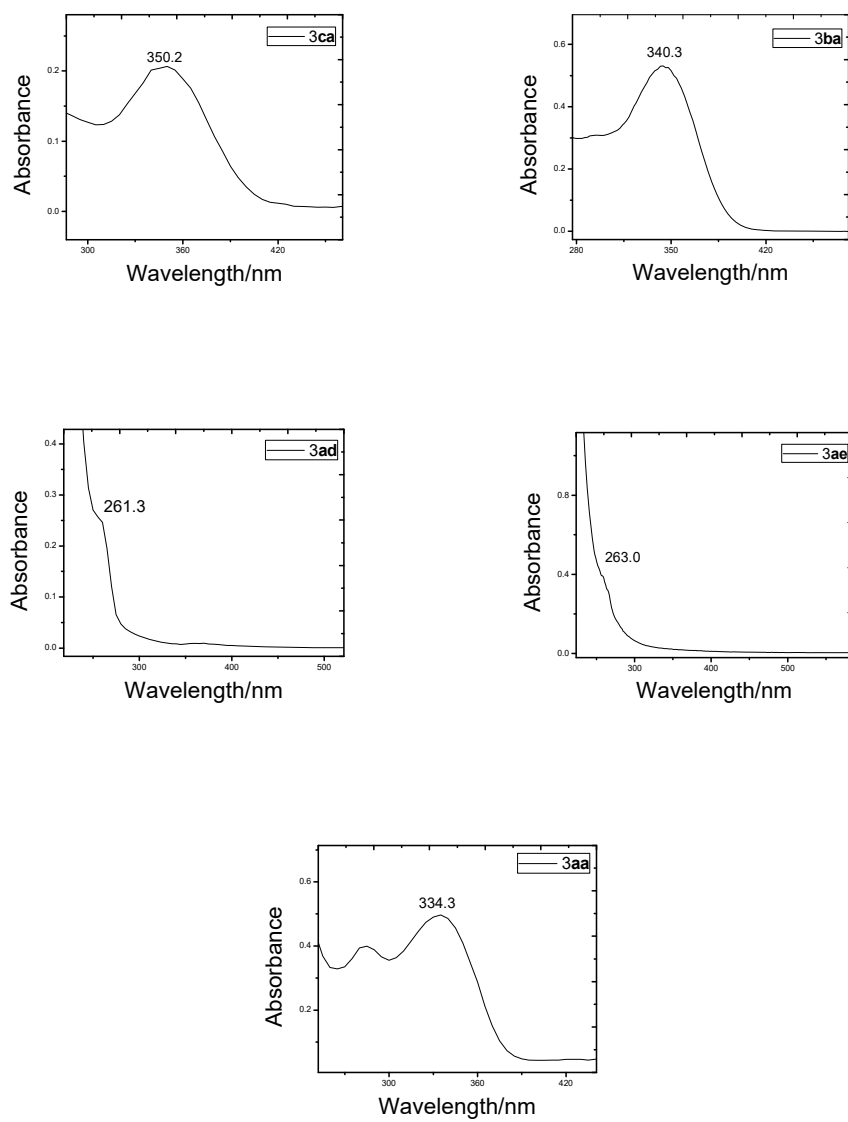

**Figure 2:** UV abs of other product **3**

## Fluorescence spectrum:

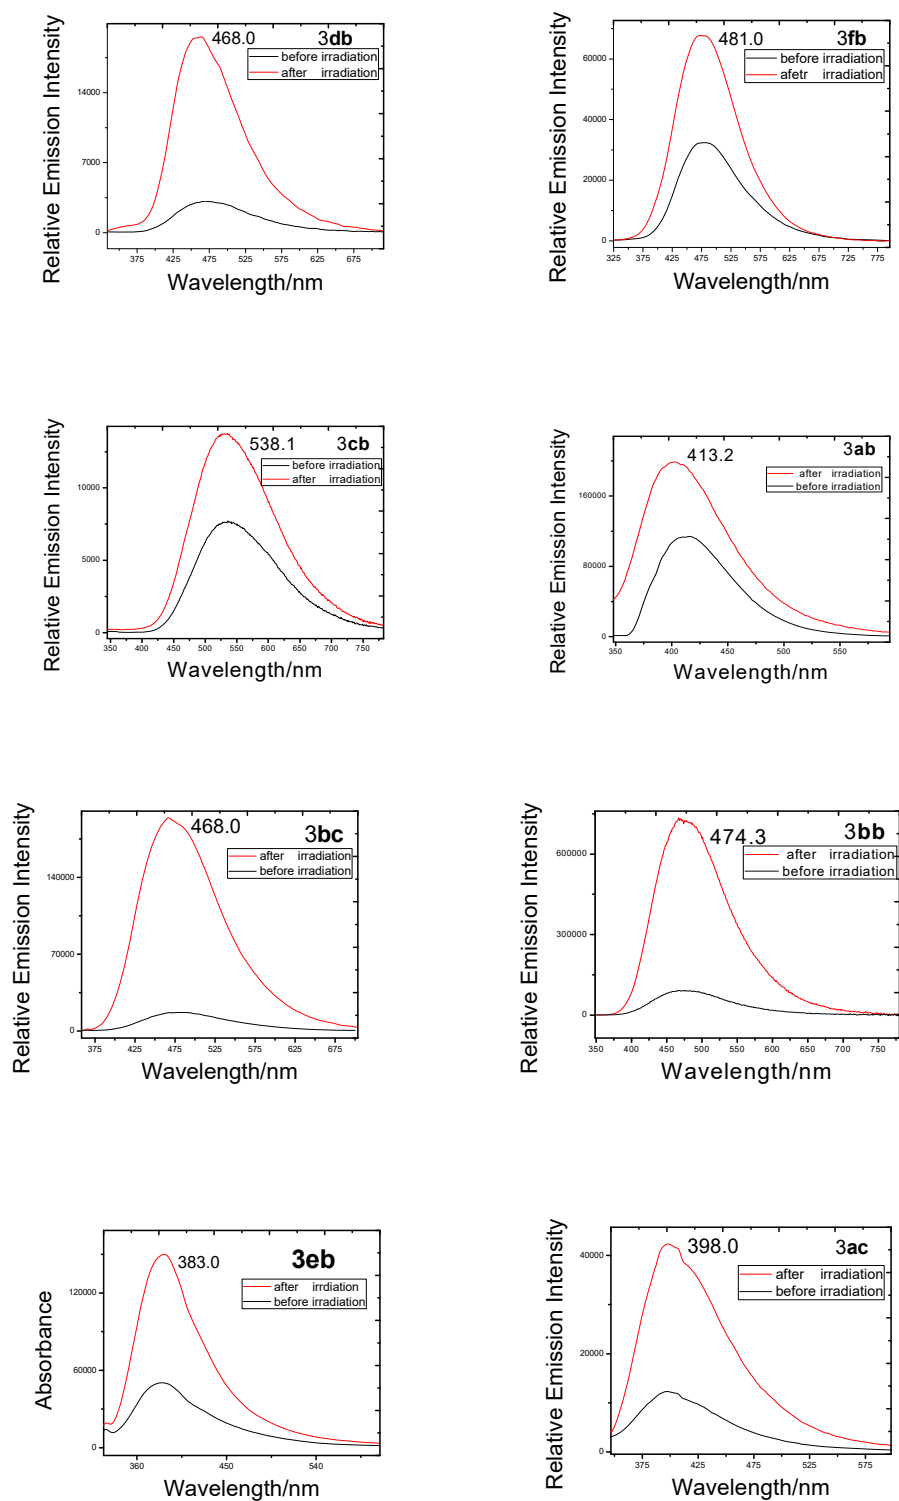

**Figure 3:** Emission scan of product **3** before and after irradiation comparisons (**photo induced R.E. reaction**)

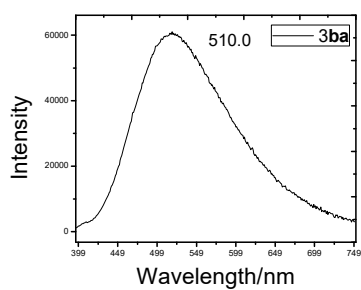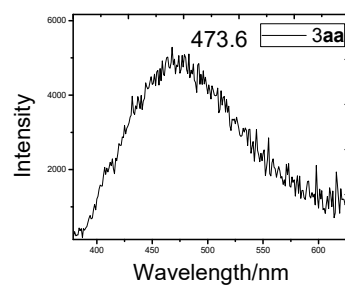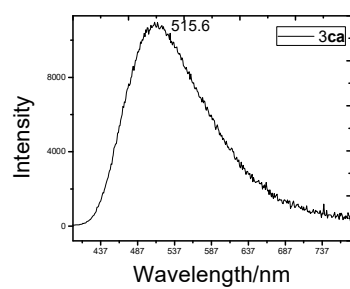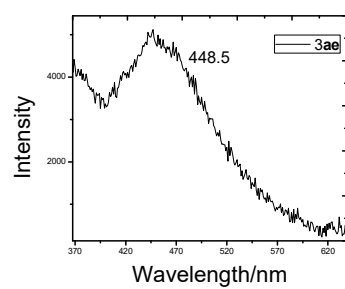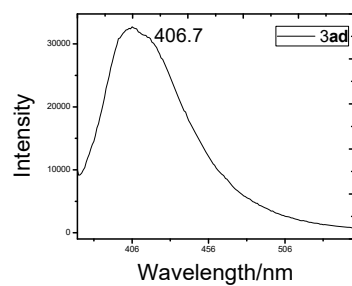

**Figure 2:** Emission scan of other product 3

## Absorption and Emission Wavelength Data of 3, 4 and 5

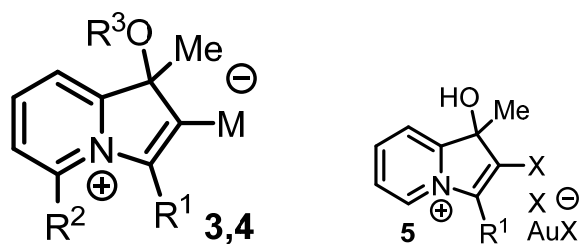

| entry | M =               | 3, 4       | $\lambda_{\text{Abs}}$ (nm) | $\lambda_{\text{Em}}$ (nm) <sup>[b]</sup> |
|-------|-------------------|------------|-----------------------------|-------------------------------------------|
| 1     | AuCl              | <b>4aa</b> | 334.3 <sup>[c]</sup>        | 473.6                                     |
| 2     | AuCl <sub>3</sub> | <b>3ab</b> | 289.3                       | 413.2                                     |
| 3     | AuBr <sub>3</sub> | <b>3ac</b> | 282.1                       | 398.0                                     |
| 4     | AuCl              | <b>4ba</b> | 340.3 <sup>[c]</sup>        | 510.0                                     |
| 5     | AuCl <sub>3</sub> | <b>3bb</b> | 281.0                       | 474.3                                     |
| 6     | AuBr <sub>3</sub> | <b>3bc</b> | 283.5                       | 468.0                                     |
| 7     | AuCl              | <b>4ca</b> | 350.2 <sup>[c]</sup>        | 515.6                                     |
| 8     | AuCl <sub>3</sub> | <b>3cb</b> | 280.5                       | 538.1                                     |
| 9     | AuCl <sub>3</sub> | <b>3db</b> | 292.0                       | 468.0                                     |
| 10    |                   | <b>3eb</b> | 292.1                       | 383.0                                     |
| 11    |                   | <b>3fb</b> | 283.9                       | 481.0                                     |
| 12    | CuCl              | <b>4ad</b> | 261.3 <sup>[c]</sup>        | 406.7                                     |
| 13    | CuBr              | <b>4ae</b> | 263.0 <sup>[c]</sup>        | 448.5                                     |

All the studies were conducted in degassed CH<sub>3</sub>CN at r.t.. [a]  $\lambda_{\text{Excitation}}$  = 330 and 350 nm

[b]  $\lambda_{\text{Excitation}}$  = 284 nm,  $\lambda_{\text{em}}$  before and after the photo-excitation are essentially the same (~ 5 nm differences).

[c] No obvious change in  $\lambda_{\text{abs}}$  (~ 5 nm differences) and intensity after photo-excitation.

### Singlet Oxygen Emission Signal Study:

As mentioned in the maintext, we suspected that there was an intersystem crossing (ISC) of Au (III) and the indolizine derivatives at their excited states, which turned the emissive singlet to the dark triplet excited state. So, we conducted experiment to detect the singlet oxygen generation and the results were summarized as follow:

**Table S1:** singlet oxygen generation quantum yield

| compound   | Single oxygen quantum yield |
|------------|-----------------------------|
| <b>3cb</b> | 26%                         |
| <b>3bb</b> | 25%                         |
| <b>3ac</b> | 14%                         |

Emission of singlet oxygen was recorded with an FLS 980 fluorescence spectrometer from Edinburgh Instrument™ equipped with an NIR-PMT detector and an 850 nm long pass filter in the emission arm. Quartz cuvettes (path length = 1 cm).

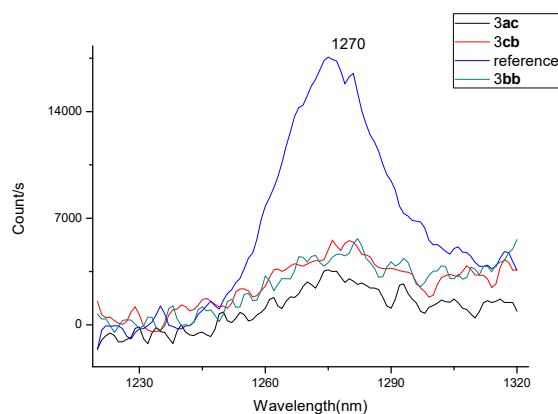

**Figure 3:** The NIR emission of  $^1\text{O}_2$

Singlet oxygen quantum yields of the compounds were determined by measuring the peak areas of the NIR emission of  $^1\text{O}_2$  centered at 1270 nm generated by these compounds and compared to that generated from the reference standard Rose Bengal ( $Q_y = 76\%$ ) upon photo-excitation at 328 nm.

## **Cytotoxicity evaluation of complex 3 on cancer cell lines**

### **Cell Cultures**

Human A549 (lung), HCT116 (colon) and HepG2 (liver) cancer cells were obtained from American Type Culture Collection (ATCC) and cultured in Dulbecco's modification of Eagle medium (DMEM) supplemented with 10% fetal bovine serum, 100 units/ml penicillin, and 100 mg/ml streptomycin. Cells were cultured at 37°C in an atmosphere of 5% CO<sub>2</sub> and 95% humidity.

### **Cell proliferation assay**

Cell proliferation was assessed by MTT [3-(4,5-dimethylthiazol-2-yl)-2,5-diphenyl tetrazolium bromide] assay. Briefly, cells were plated in 96-well plates (2x10<sup>3</sup> cells/well) and then treated with indolizine derivatives ligated Au(III) complexes for 72 h. Afterward, cells were treated with MTT reagent and the absorbance at 570 nm was measured using a microplate reader. The viability of control (untreated cells) was regarded as 100%.

### **Cytotoxic effects of indolizine derivatives ligated Au(III) complexes.**

A549 (lung), HCT116 (colon) and HepG2 (liver) cancer cells were untreated or treated with different concentrations of indolizine derivatives ligated Au(III) complexes for 72 h. Cell viability was assessed by the MTT assay. IC<sub>50</sub> represents the drug concentration required for 50% inhibition of cell proliferation. The data are presented as the mean ± SD of three replicates. Results are representative of 2 independent experiments.

## Results

To determine the potential anticancer activity of indolizine derivatives ligated Au(III) complexes, three human cancer cell lines (A549, HCT116 and HepG2) were treated with different concentrations of Au(III) complexes and then assayed for cell viability. Conducted at 0.1% v/v DMSO in cell culture medium.

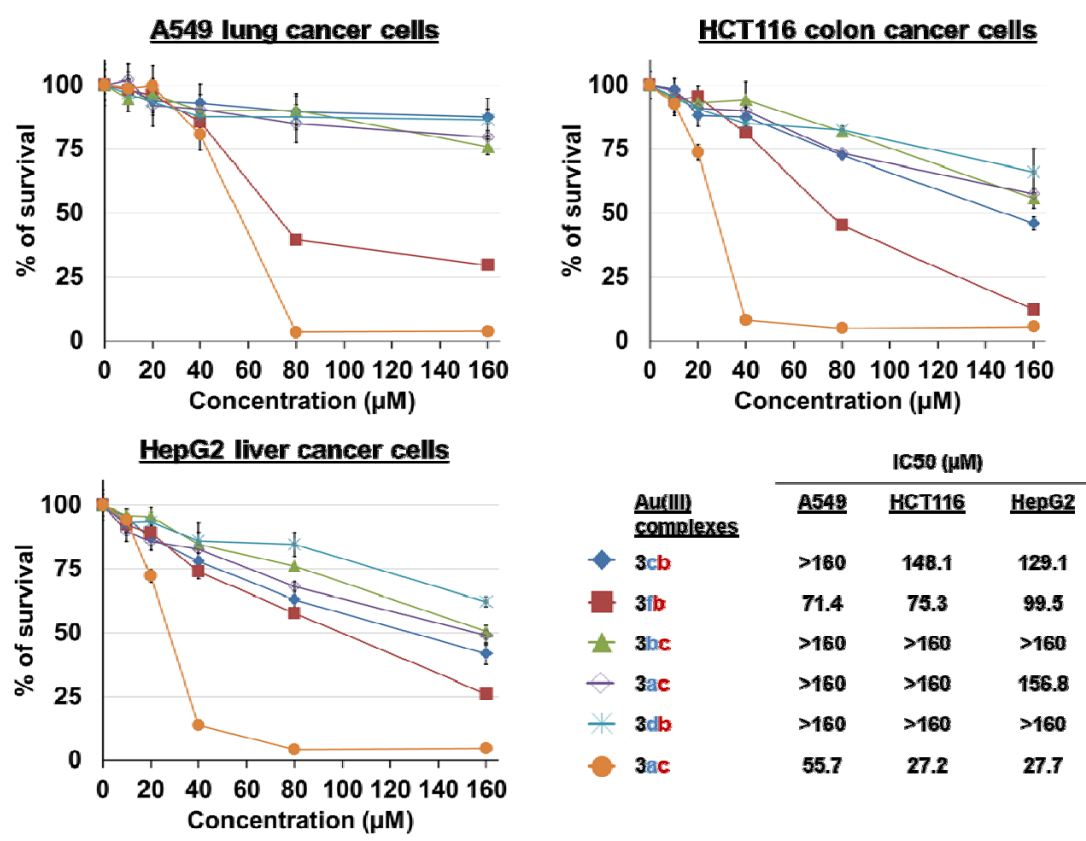

This preliminary study showed that the substituent effect is very critical, in which complex **3ac** exerted a good cytotoxic effects to those cell lines with IC50 values of 27.2 to 55.7μM, compared with other Au(III) complexes.

Raw data for the graphs above:

#### A549

|           | <u>% Survival</u> |        |        |        |        |        |
|-----------|-------------------|--------|--------|--------|--------|--------|
|           | 3cb               | 3fb    | 3bc    | 3ac    | 3db    | 3ac    |
| <u>uM</u> |                   |        |        |        |        |        |
| 160       | 87.48             | 29.66  | 75.73  | 79.61  | 86.37  | 3.55   |
| 80        | 89.62             | 39.37  | 90.11  | 84.88  | 87.55  | 3.25   |
| 40        | 92.95             | 85.59  | 89.97  | 90.58  | 87.71  | 80.59  |
| 20        | 93.84             | 96.19  | 96.30  | 92.02  | 93.42  | 99.66  |
| 10        | 98.94             | 98.12  | 94.64  | 102.04 | 96.63  | 98.74  |
| 0         | 100.00            | 100.00 | 100.00 | 100.00 | 100.00 | 100.00 |

|           | <u>St. Dev.</u> |      |      |      |      |      |
|-----------|-----------------|------|------|------|------|------|
|           | 3cb             | 3fb  | 3bc  | 3ac  | 3db  | 3ac  |
| <u>uM</u> |                 |      |      |      |      |      |
| 160       | 7.38            | 0.25 | 3.07 | 5.14 | 4.16 | 0.10 |
| 80        | 7.09            | 0.74 | 5.74 | 7.42 | 0.60 | 0.16 |
| 40        | 7.72            | 2.92 | 6.47 | 9.65 | 4.16 | 6.11 |
| 20        | 4.55            | 6.13 | 2.15 | 8.12 | 5.11 | 7.76 |
| 10        | 9.18            | 4.16 | 1.65 | 6.23 | 2.90 | 6.22 |
| 0         | 6.11            | 8.01 | 5.77 | 0.90 | 3.31 | 2.02 |

#### H116

|           | <u>% Survival</u> |        |        |        |        |        |
|-----------|-------------------|--------|--------|--------|--------|--------|
|           | 3cb               | 3fb    | 3bc    | 3ac    | 3db    | 3ac    |
| <u>uM</u> |                   |        |        |        |        |        |
| 160       | 45.82             | 12.13  | 55.72  | 57.45  | 65.97  | 5.36   |
| 80        | 72.49             | 45.12  | 81.85  | 73.35  | 82.41  | 4.76   |
| 40        | 87.49             | 81.21  | 94.30  | 90.05  | 85.02  | 7.97   |
| 20        | 88.18             | 95.50  | 93.12  | 90.84  | 90.58  | 73.70  |
| 10        | 98.43             | 94.14  | 94.07  | 97.79  | 95.29  | 92.63  |
| 0         | 100.00            | 100.00 | 100.00 | 100.00 | 100.00 | 100.00 |

|           | <u>St. Dev.</u> |      |      |      |      |      |
|-----------|-----------------|------|------|------|------|------|
|           | 3cb             | 3fb  | 3bc  | 3ac  | 3db  | 3ac  |
| <u>uM</u> |                 |      |      |      |      |      |
| 160       | 2.56            | 0.91 | 3.89 | 0.62 | 9.04 | 0.19 |
| 80        | 1.00            | 0.99 | 0.80 | 0.67 | 1.42 | 0.16 |
| 40        | 3.76            | 1.61 | 7.12 | 4.11 | 1.98 | 0.90 |
| 20        | 1.77            | 4.18 | 1.46 | 2.71 | 6.65 | 2.98 |
| 10        | 4.10            | 6.01 | 1.99 | 4.52 | 2.88 | 3.28 |
| 0         | 1.04            | 5.35 | 1.28 | 1.06 | 1.09 | 1.22 |

## HepG2

|           | <u>% Survival</u> |        |        |        |        |        |
|-----------|-------------------|--------|--------|--------|--------|--------|
|           | 3cb               | 3fb    | 3bc    | 3ac    | 3db    | 3ac    |
| <u>uM</u> |                   |        |        |        |        |        |
| 160       | 41.71             | 26.07  | 50.56  | 49.05  | 62.14  | 4.56   |
| 80        | 62.96             | 57.66  | 76.10  | 68.06  | 84.60  | 4.15   |
| 40        | 77.98             | 73.93  | 84.57  | 82.69  | 85.94  | 13.69  |
| 20        | 87.16             | 89.15  | 95.60  | 85.85  | 93.45  | 72.13  |
| 10        | 95.39             | 92.41  | 96.03  | 89.68  | 93.21  | 94.27  |
| 0         | 100.00            | 100.00 | 100.00 | 100.00 | 100.00 | 100.00 |

|           | <u>St. Dev.</u> |      |      |      |      |      |
|-----------|-----------------|------|------|------|------|------|
|           | 3cb             | 3fb  | 3bc  | 3ac  | 3db  | 3ac  |
| <u>uM</u> |                 |      |      |      |      |      |
| 160       | 4.21            | 1.44 | 2.32 | 3.89 | 1.99 | 0.12 |
| 80        | 4.91            | 1.64 | 0.72 | 1.94 | 4.75 | 0.12 |
| 40        | 6.93            | 0.81 | 4.84 | 1.54 | 7.12 | 1.56 |
| 20        | 4.79            | 3.04 | 1.64 | 3.37 | 5.58 | 2.46 |
| 10        | 2.96            | 3.09 | 2.34 | 3.90 | 3.30 | 1.43 |
| 0         | 4.17            | 0.71 | 5.81 | 2.40 | 5.87 | 1.53 |

|    | Parameter              | Value               |
|----|------------------------|---------------------|
| 1  | Title                  | YJ-01-136           |
| 2  | Comment                |                     |
| 3  | Origin                 | Bruker BioSpin GmbH |
| 4  | Owner                  | nmr                 |
| 5  | Site                   |                     |
| 6  | Spectrometer           | spect               |
| 7  | Author                 |                     |
| 8  | Solvent                | CDC13               |
| 9  | Temperature            | 296.2               |
| 10 | Pulse Sequence         | zg30                |
| 11 | Experiment             | 1D                  |
| 12 | Number of Scans        | 12                  |
| 13 | Receiver Gain          | 95                  |
| 14 | Relaxation Delay       | 1.0000              |
| 15 | Pulse Width            | 10.7100             |
| 16 | Acquisition Time       | 3.2768              |
| 17 | Acquisition Date       | 2018-09-20T18:21:34 |
| 18 | Modification Date      | 2018-09-20T19:12:56 |
| 19 | Spectrometer Frequency | 500.13              |
| 20 | Spectral Width         | 10000.0             |
| 21 | Lowest Frequency       | -1911.5             |
| 22 | Nucleus                | <sup>1</sup> H      |
| 23 | Acquired Size          | 32768               |
| 24 | Spectral Size          | 65536               |

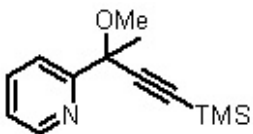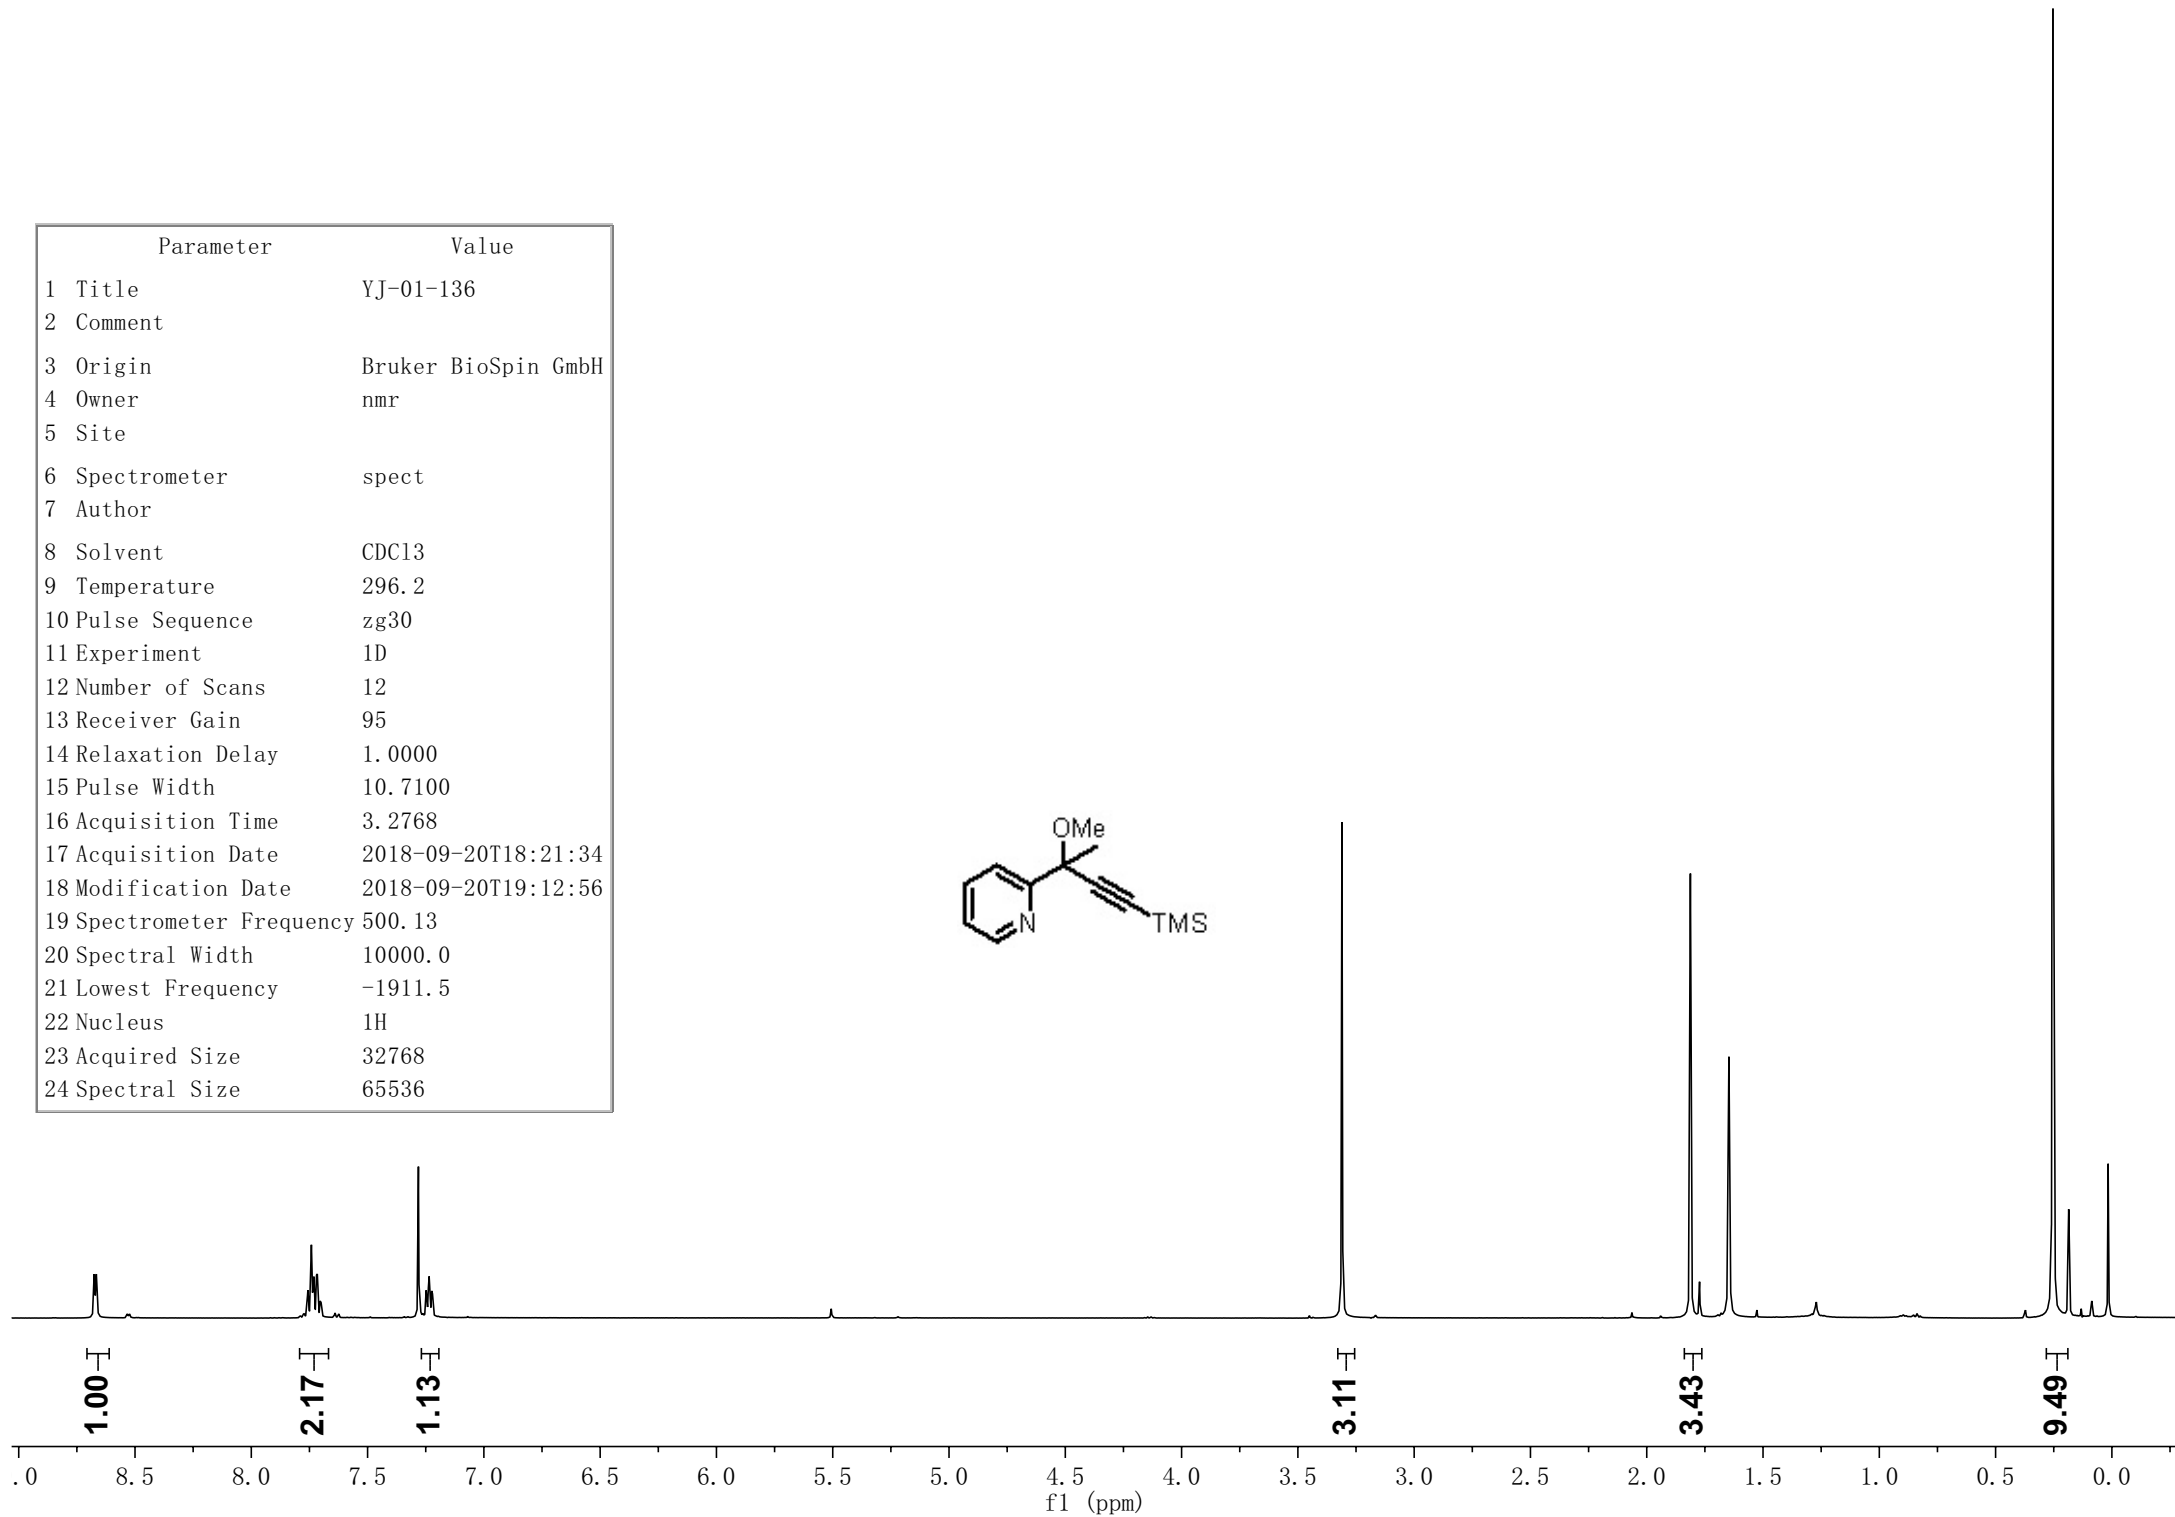

160.42

149.49

136.54

122.70

121.10

105.05

92.22

52.51

29.63

-0.02

| Parameter                 | Value               |
|---------------------------|---------------------|
| 1 Title                   | YJ-01-136           |
| 2 Comment                 |                     |
| 3 Origin                  | Bruker BioSpin GmbH |
| 4 Owner                   | nmr                 |
| 5 Site                    |                     |
| 6 Spectrometer            | spect               |
| 7 Author                  |                     |
| 8 Solvent                 | CDCl3               |
| 9 Temperature             | 296.1               |
| 10 Pulse Sequence         | zgpg30              |
| 11 Experiment             | 1D                  |
| 12 Number of Scans        | 279                 |
| 13 Receiver Gain          | 193                 |
| 14 Relaxation Delay       | 2.0000              |
| 15 Pulse Width            | 9.6000              |
| 16 Acquisition Time       | 1.1010              |
| 17 Acquisition Date       | 2018-09-20T18:36:36 |
| 18 Modification Date      | 2018-09-20T19:12:56 |
| 19 Spectrometer Frequency | 125.76              |
| 20 Spectral Width         | 29761.9             |
| 21 Lowest Frequency       | -2305.8             |
| 22 Nucleus                | 13C                 |
| 23 Acquired Size          | 32768               |
| 24 Spectral Size          | 65536               |

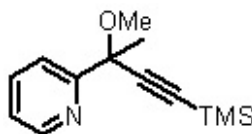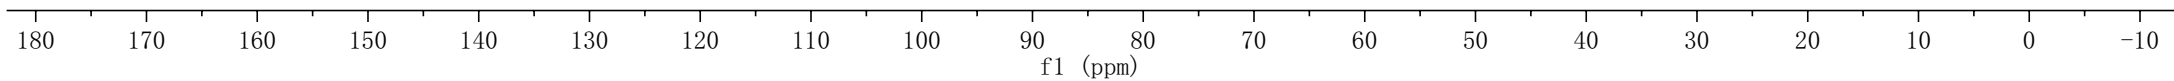

| Parameter                 | Value               |
|---------------------------|---------------------|
| 1 Title                   | YJ-01-81            |
| 2 Comment                 |                     |
| 3 Origin                  | Bruker BioSpin GmbH |
| 4 Owner                   | nmr                 |
| 5 Site                    |                     |
| 6 Spectrometer            | spect               |
| 7 Author                  |                     |
| 8 Solvent                 | CDC13               |
| 9 Temperature             | 296.2               |
| 10 Pulse Sequence         | zg30                |
| 11 Experiment             | 1D                  |
| 12 Number of Scans        | 6                   |
| 13 Receiver Gain          | 78                  |
| 14 Relaxation Delay       | 1.0000              |
| 15 Pulse Width            | 10.7100             |
| 16 Acquisition Time       | 3.2768              |
| 17 Acquisition Date       | 2018-08-16T14:13:22 |
| 18 Modification Date      | 2018-08-16T15:57:08 |
| 19 Spectrometer Frequency | 500.13              |
| 20 Spectral Width         | 10000.0             |
| 21 Lowest Frequency       | -1911.5             |
| 22 Nucleus                | <sup>1</sup> H      |
| 23 Acquired Size          | 32768               |
| 24 Spectral Size          | 65536               |

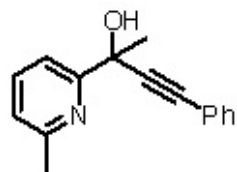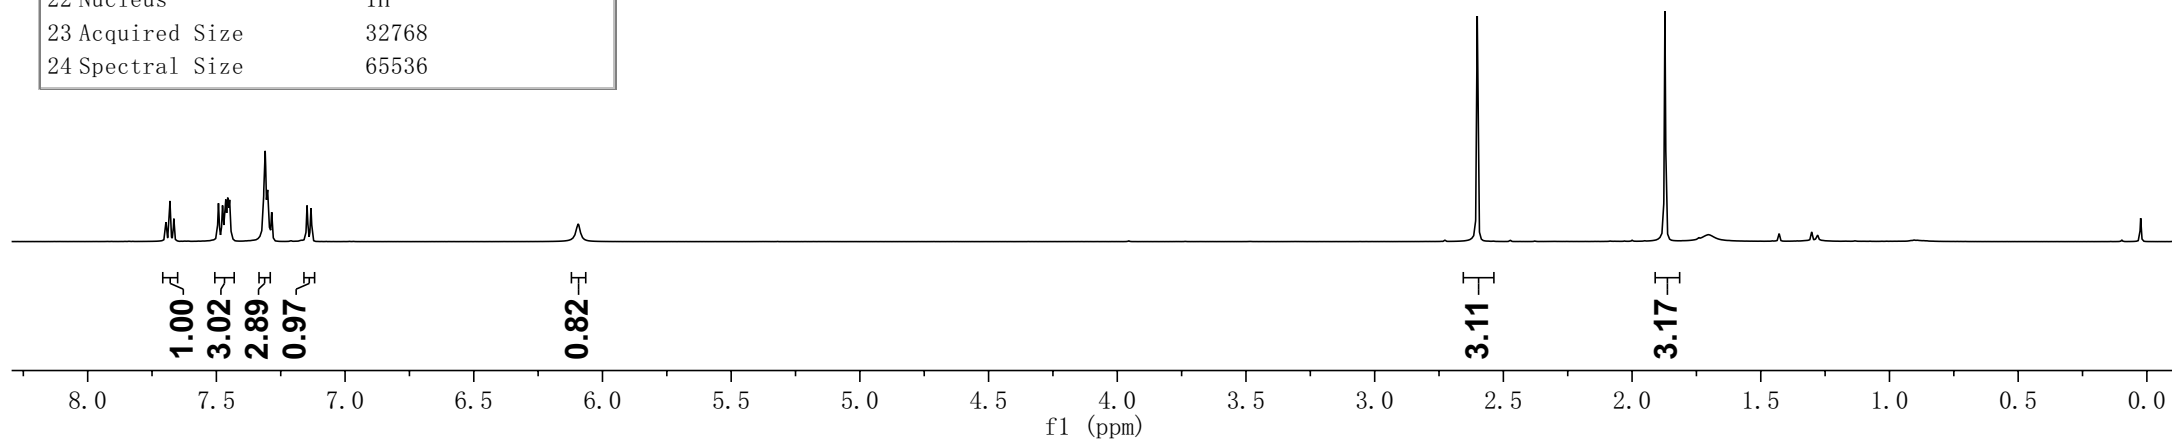

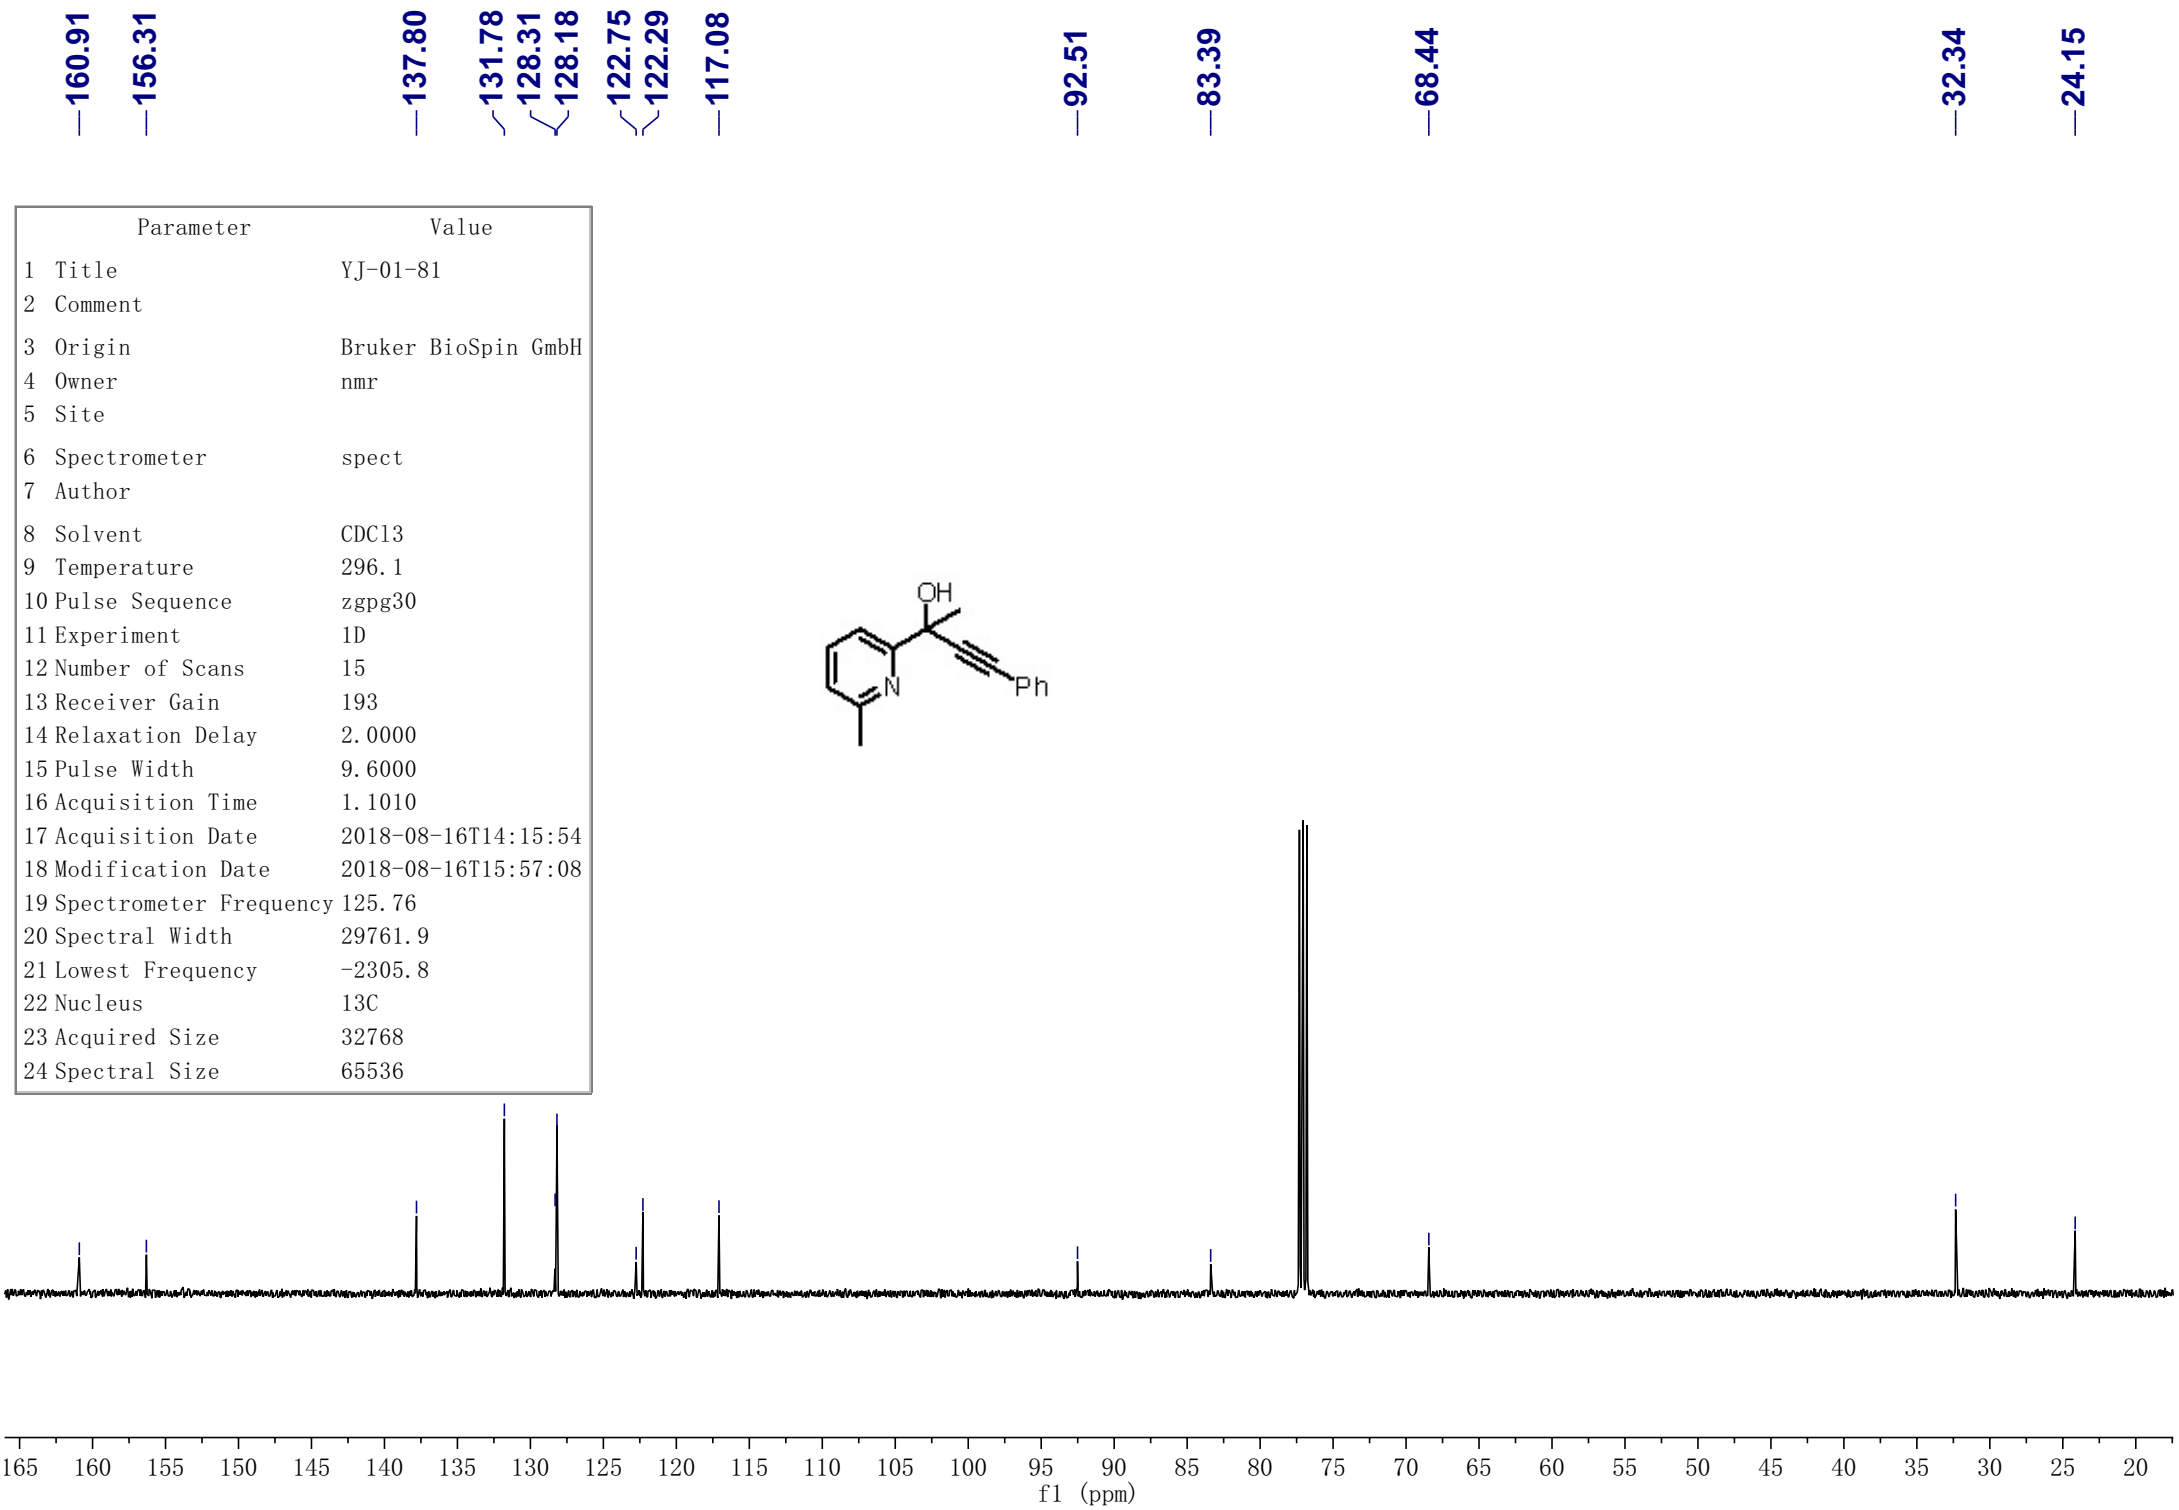

| Parameter                 | Value               |
|---------------------------|---------------------|
| 1 Title                   | YJ-01-131-P         |
| 2 Comment                 |                     |
| 3 Origin                  | Bruker BioSpin GmbH |
| 4 Owner                   | nmr                 |
| 5 Site                    |                     |
| 6 Spectrometer            | spect               |
| 7 Author                  |                     |
| 8 Solvent                 | CDC13               |
| 9 Temperature             | 295.7               |
| 10 Pulse Sequence         | zg30                |
| 11 Experiment             | 1D                  |
| 12 Number of Scans        | 8                   |
| 13 Receiver Gain          | 22                  |
| 14 Relaxation Delay       | 1.0000              |
| 15 Pulse Width            | 10.0000             |
| 16 Acquisition Time       | 1.9999              |
| 17 Acquisition Date       | 2018-08-16T21:55:33 |
| 18 Modification Date      | 2018-08-27T19:37:40 |
| 19 Spectrometer Frequency | 400.13              |
| 20 Spectral Width         | 8012.8              |
| 21 Lowest Frequency       | -1535.4             |
| 22 Nucleus                | <sup>1</sup> H      |
| 23 Acquired Size          | 16025               |
| 24 Spectral Size          | 32768               |

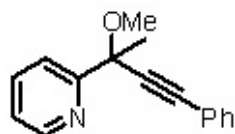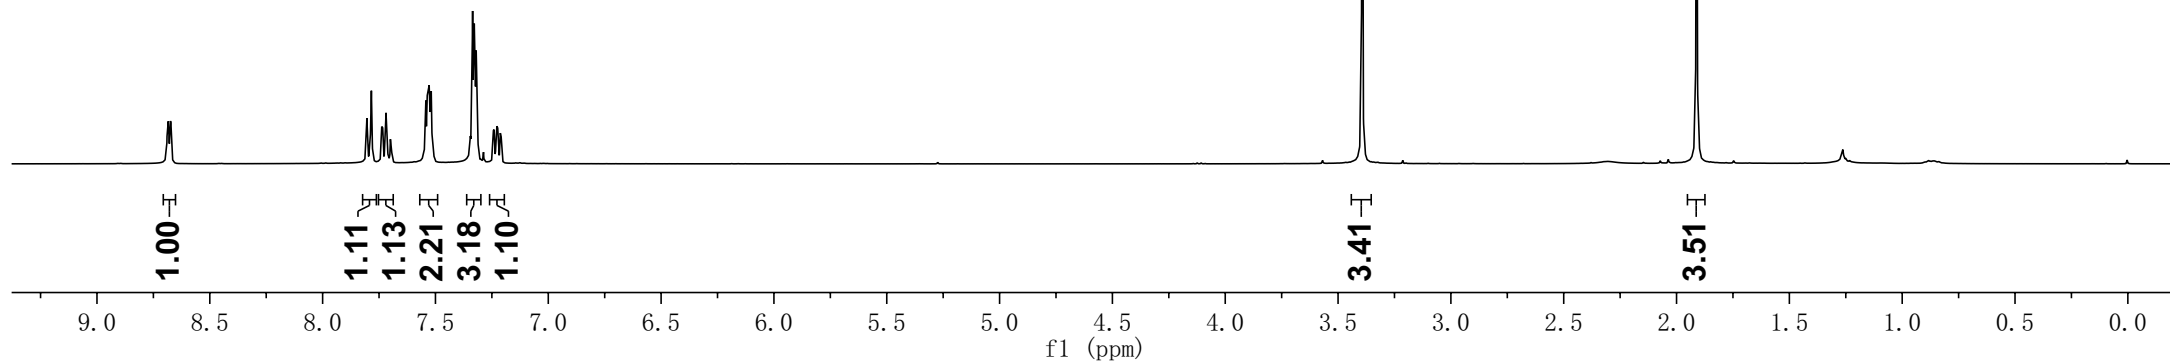

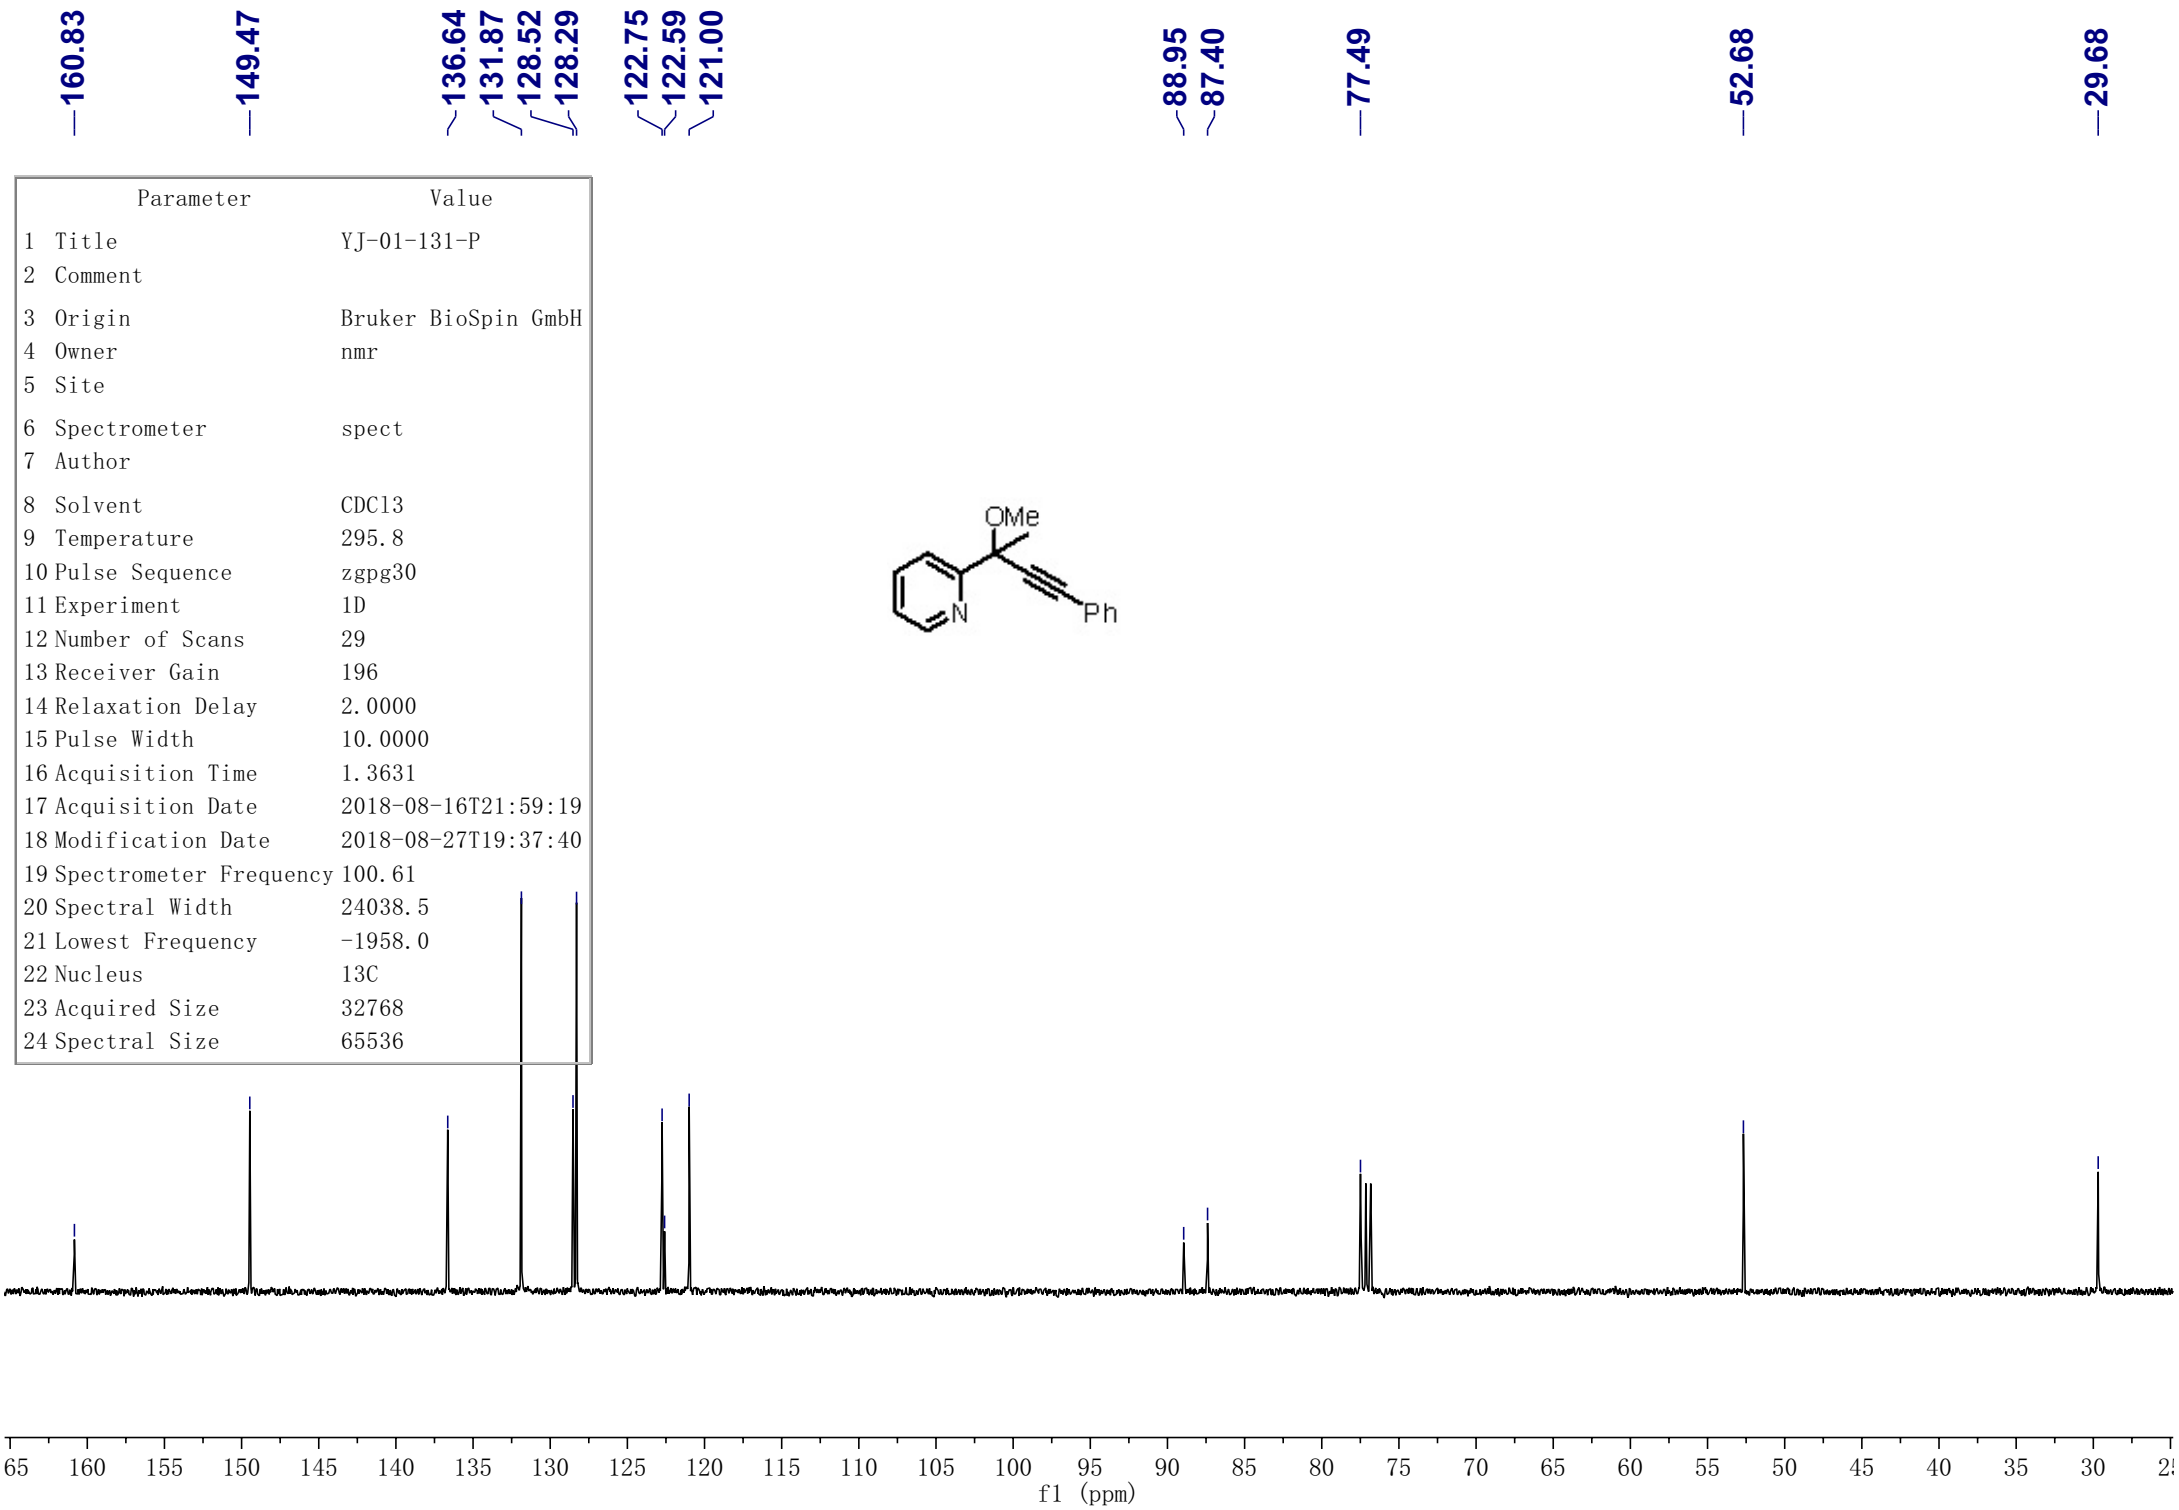

| Parameter                 | Value               |
|---------------------------|---------------------|
| 1 Title                   | zxh-s-1-57-20160812 |
| 2 Comment                 | zxh-s-1-57-20160812 |
| 3 Origin                  | Bruker BioSpin GmbH |
| 4 Owner                   | nmr                 |
| 5 Site                    |                     |
| 6 Spectrometer            | spect               |
| 7 Author                  |                     |
| 8 Solvent                 | Acetone             |
| 9 Temperature             | 298.1               |
| 10 Pulse Sequence         | zg30                |
| 11 Experiment             | 1D                  |
| 12 Number of Scans        | 10                  |
| 13 Receiver Gain          | 174                 |
| 14 Relaxation Delay       | 1.0000              |
| 15 Pulse Width            | 9.6000              |
| 16 Acquisition Time       | 1.9999              |
| 17 Acquisition Date       | 2016-08-12T09:53:12 |
| 18 Modification Date      | 2016-08-12T10:16:27 |
| 19 Spectrometer Frequency | 400.13              |
| 20 Spectral Width         | 8012.8              |
| 21 Lowest Frequency       | -1535.4             |
| 22 Nucleus                | <sup>1</sup> H      |
| 23 Acquired Size          | 16025               |
| 24 Spectral Size          | 32768               |

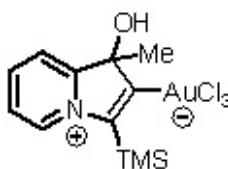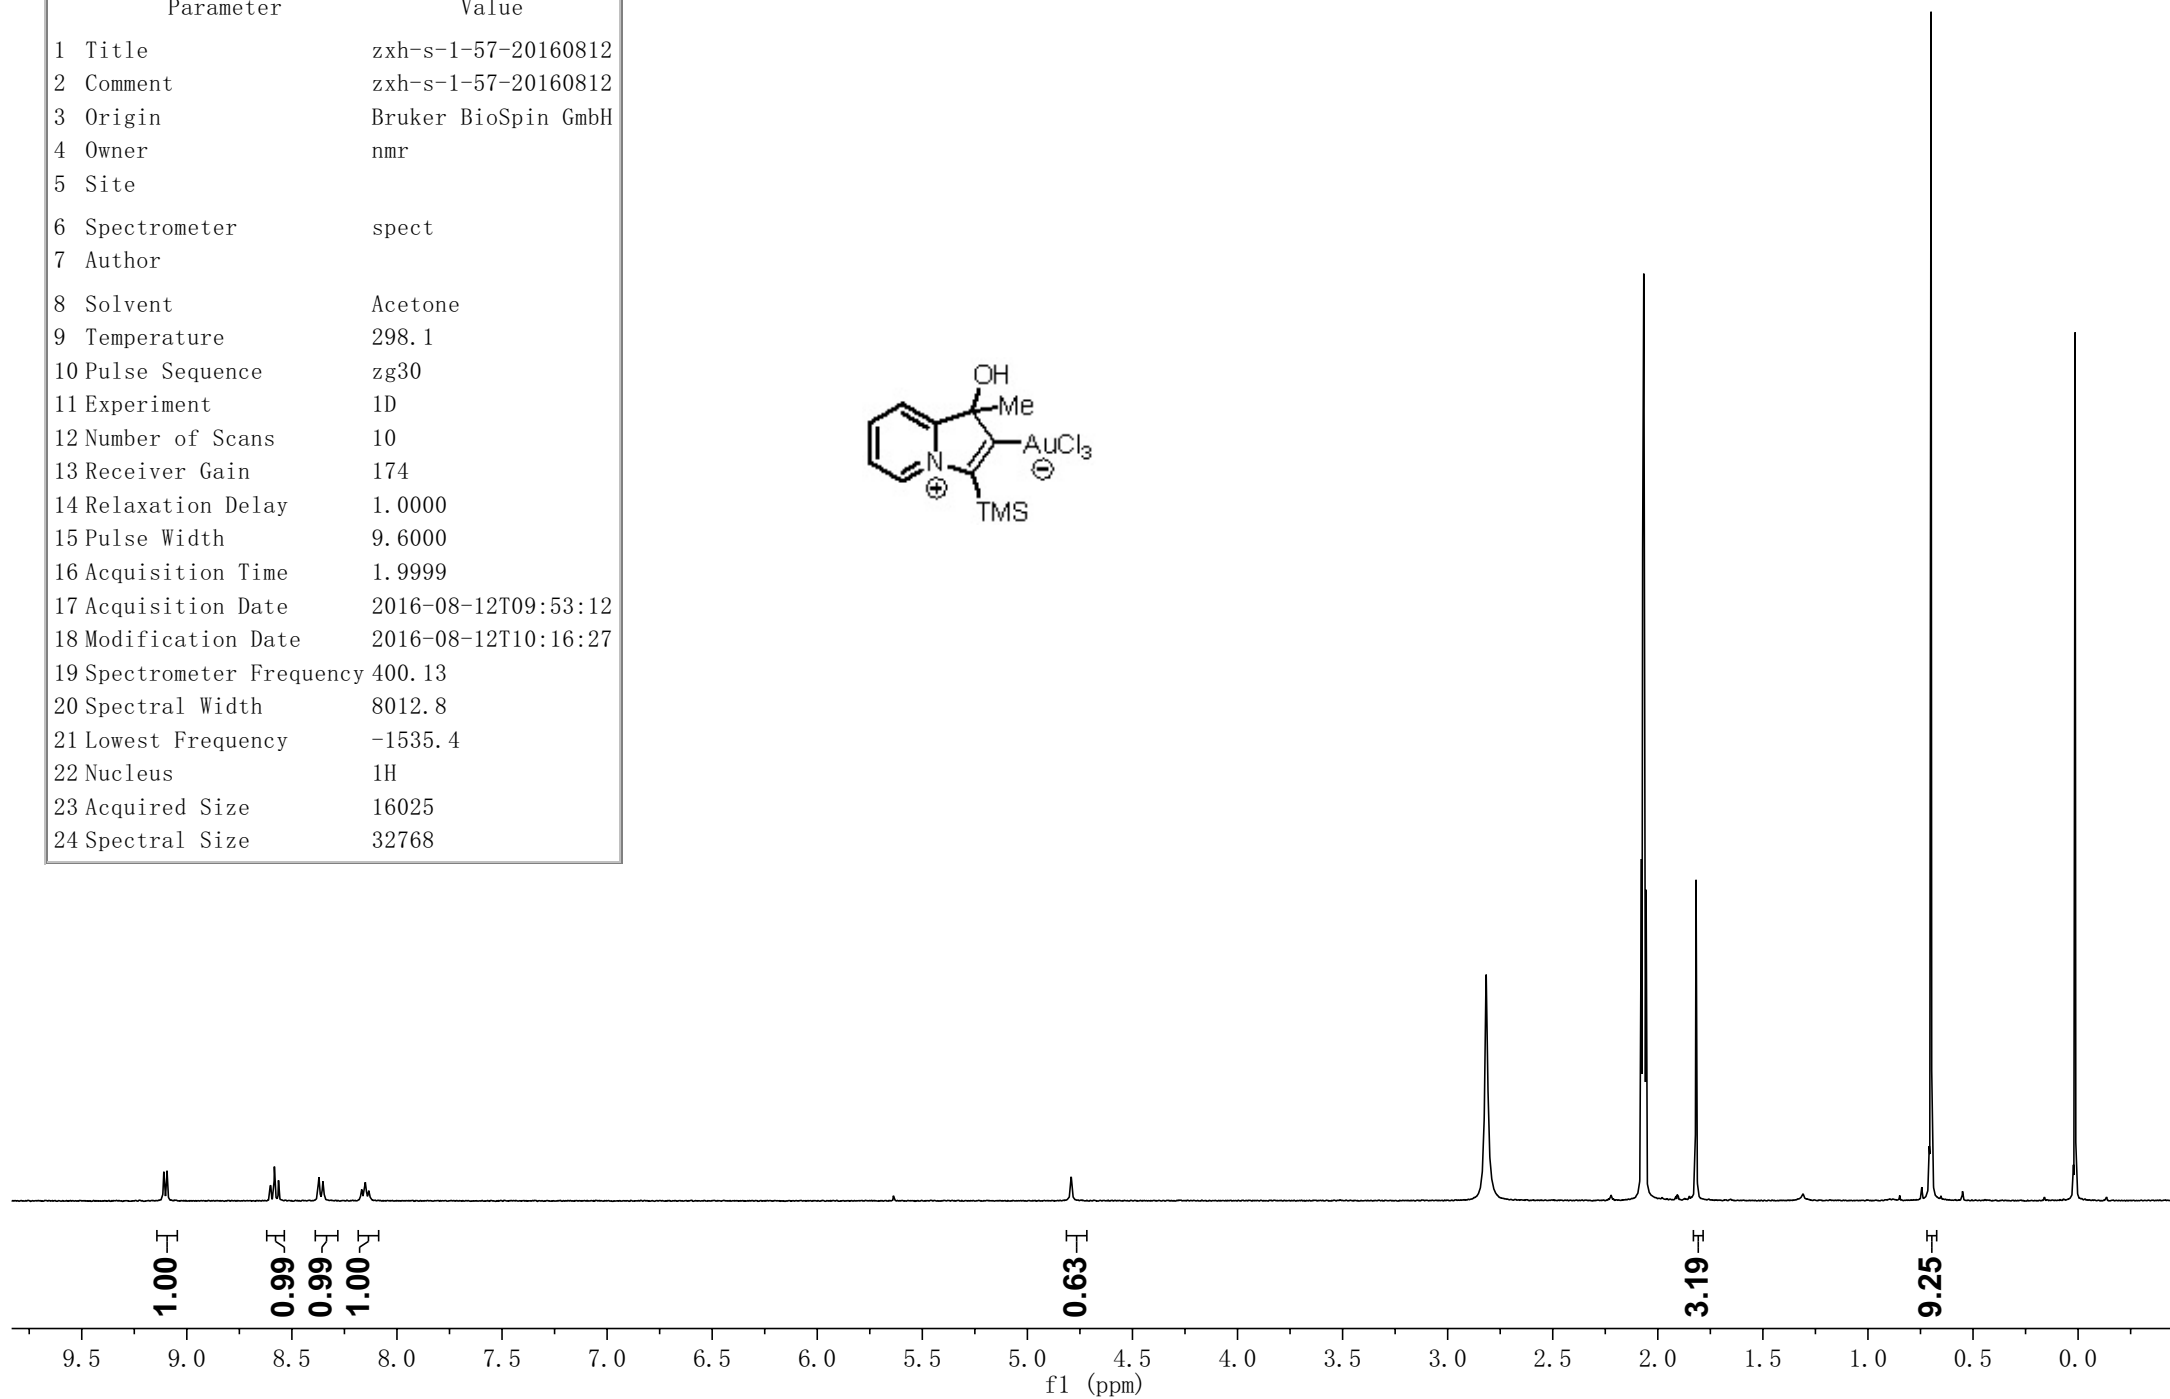

162.34  
160.11

143.29  
139.33  
137.01

127.42  
122.76

84.58

25.45

-0.80

| Parameter                 | Value               |
|---------------------------|---------------------|
| 1 Title                   | zxb-s-1-57_13C      |
| 2 Comment                 |                     |
| 3 Origin                  | Bruker BioSpin GmbH |
| 4 Owner                   | nmr                 |
| 5 Site                    |                     |
| 6 Spectrometer            | spect               |
| 7 Author                  |                     |
| 8 Solvent                 | Acetone             |
| 9 Temperature             | 296.2               |
| 10 Pulse Sequence         | zgpg30              |
| 11 Experiment             | 1D                  |
| 12 Number of Scans        | 3000                |
| 13 Receiver Gain          | 193                 |
| 14 Relaxation Delay       | 2.0000              |
| 15 Pulse Width            | 10.0000             |
| 16 Acquisition Time       | 1.1010              |
| 17 Acquisition Date       | 2016-01-17T08:08:42 |
| 18 Modification Date      | 2016-01-18T09:44:09 |
| 19 Spectrometer Frequency | 125.77              |
| 20 Spectral Width         | 29761.9             |
| 21 Lowest Frequency       | -2305.8             |
| 22 Nucleus                | 13C                 |
| 23 Acquired Size          | 32768               |
| 24 Spectral Size          | 65536               |

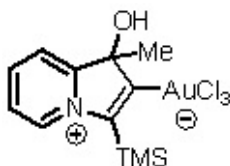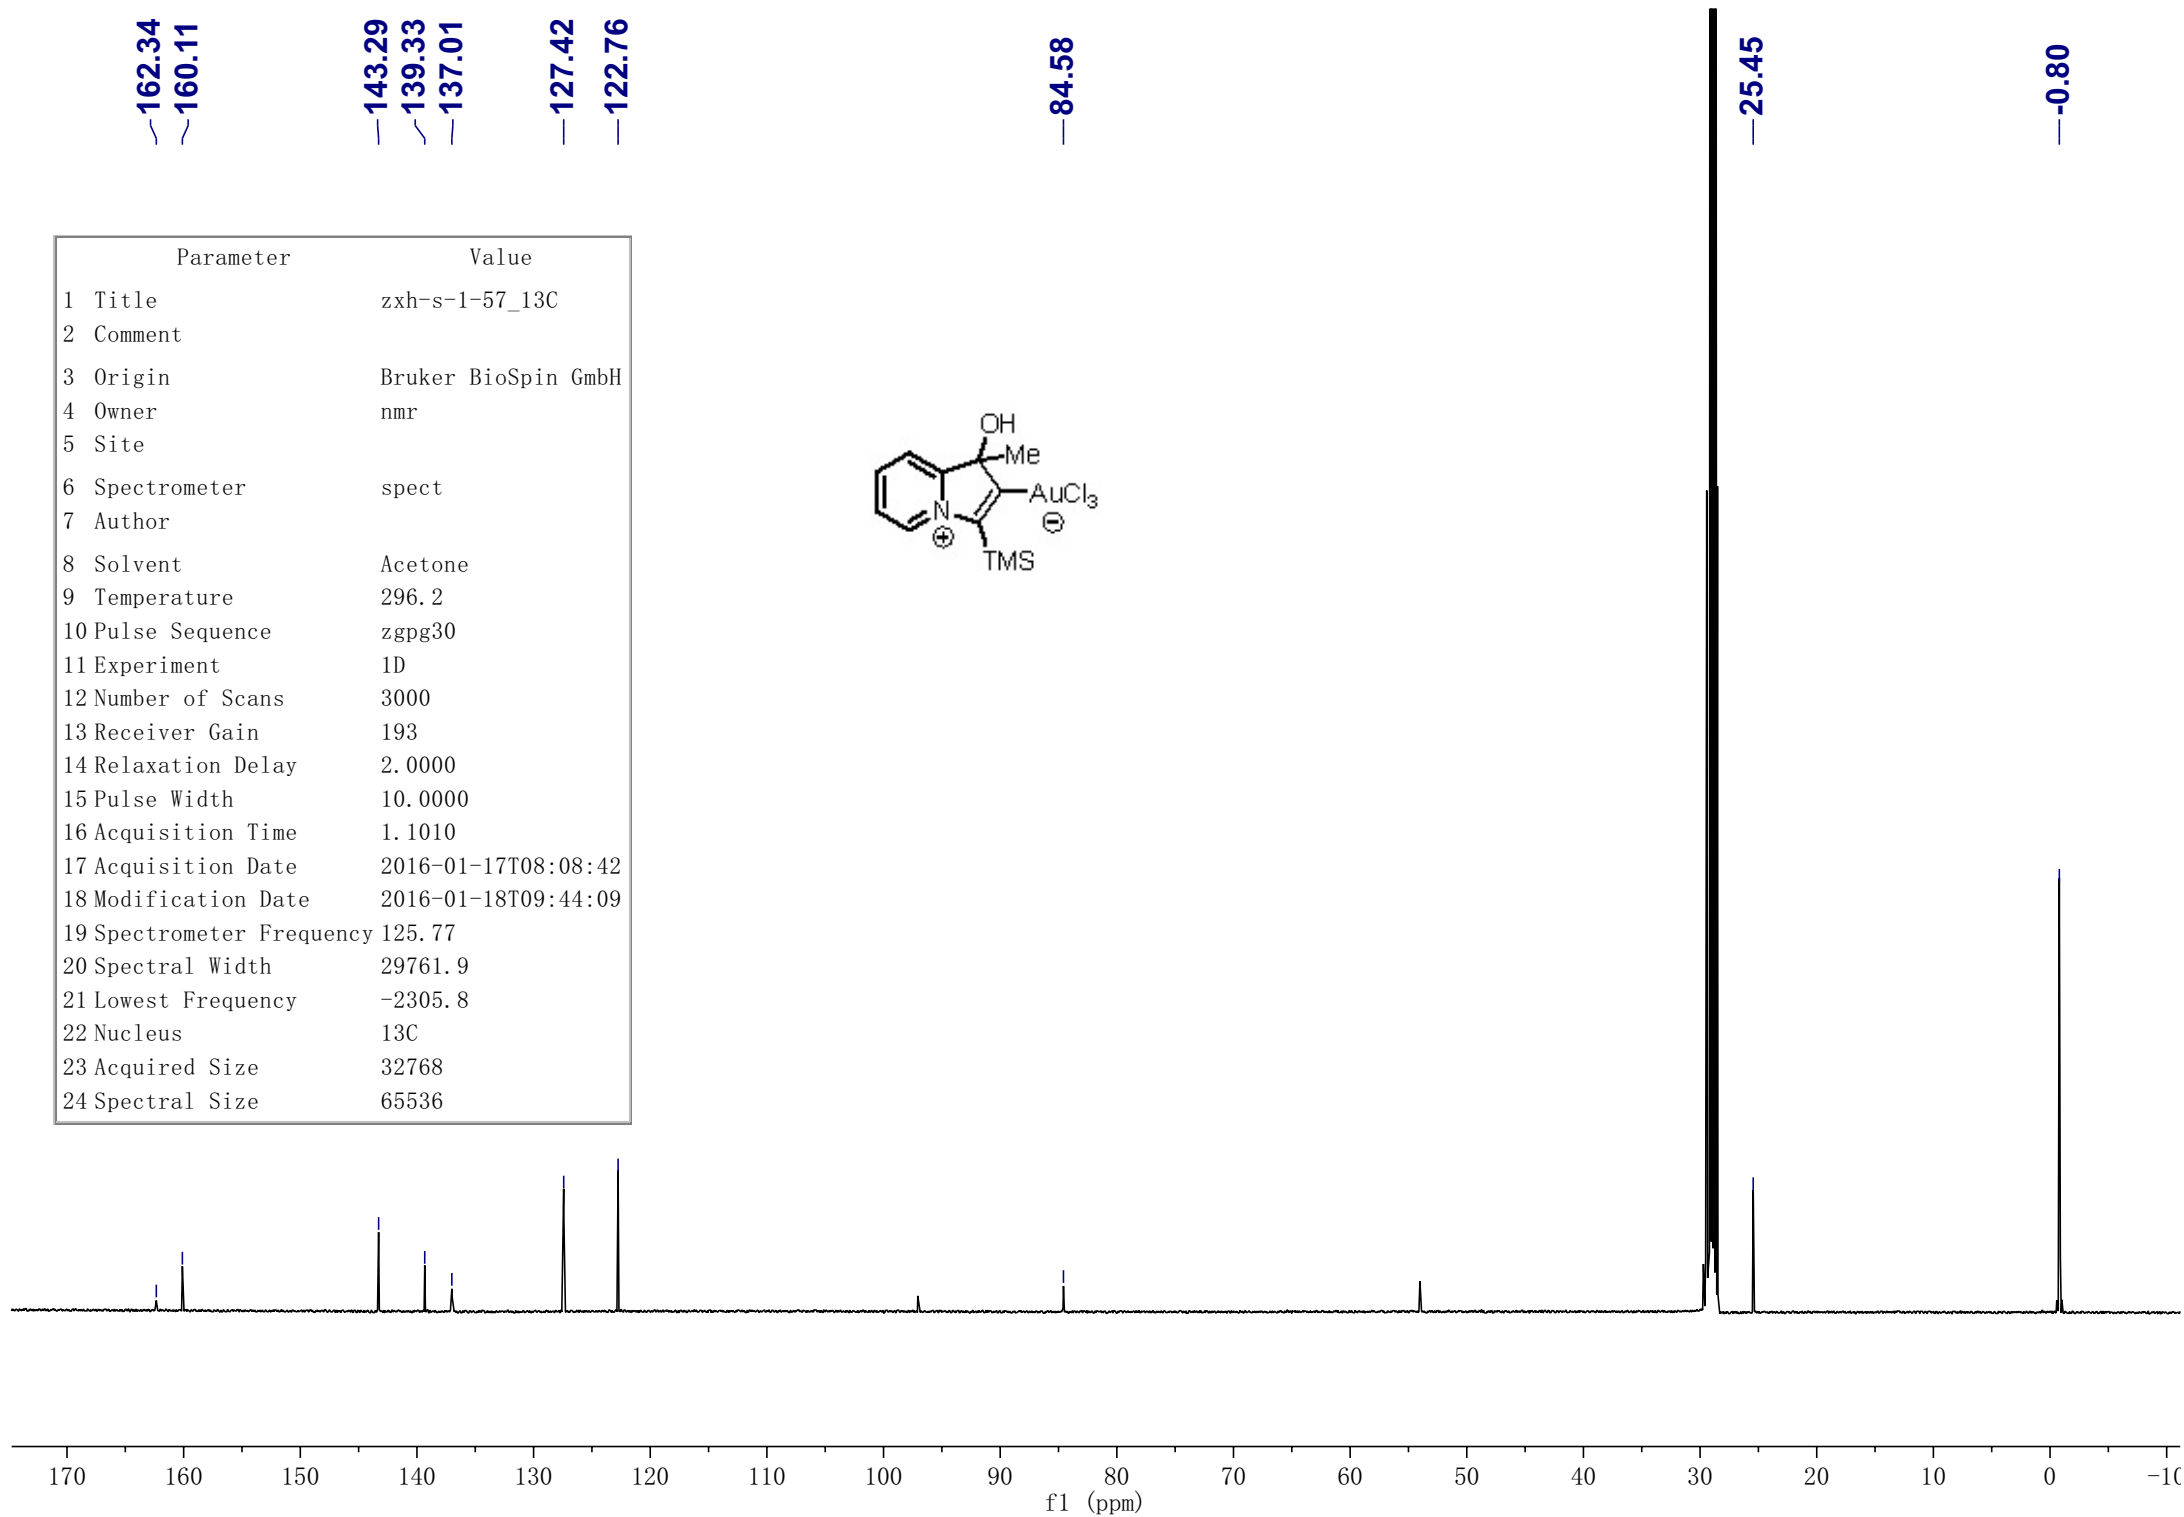

|    | Parameter              | Value               |
|----|------------------------|---------------------|
| 1  | Title                  | zxb-s-1-76-f1       |
| 2  | Comment                | zxb-s-1-76-f1       |
| 3  | Origin                 | Bruker BioSpin GmbH |
| 4  | Owner                  | nmr                 |
| 5  | Site                   |                     |
| 6  | Spectrometer           | spect               |
| 7  | Author                 |                     |
| 8  | Solvent                | Acetone             |
| 9  | Temperature            | 294.5               |
| 10 | Pulse Sequence         | zg30                |
| 11 | Experiment             | 1D                  |
| 12 | Number of Scans        | 8                   |
| 13 | Receiver Gain          | 62                  |
| 14 | Relaxation Delay       | 1.0000              |
| 15 | Pulse Width            | 9.6000              |
| 16 | Acquisition Time       | 1.9999              |
| 17 | Acquisition Date       | 2016-03-15T12:26:12 |
| 18 | Modification Date      | 2016-03-15T13:01:41 |
| 19 | Spectrometer Frequency | 400.13              |
| 20 | Spectral Width         | 8012.8              |
| 21 | Lowest Frequency       | -1535.4             |
| 22 | Nucleus                | <sup>1</sup> H      |
| 23 | Acquired Size          | 16025               |
| 24 | Spectral Size          | 32768               |

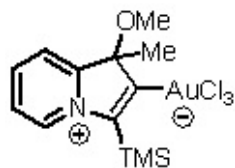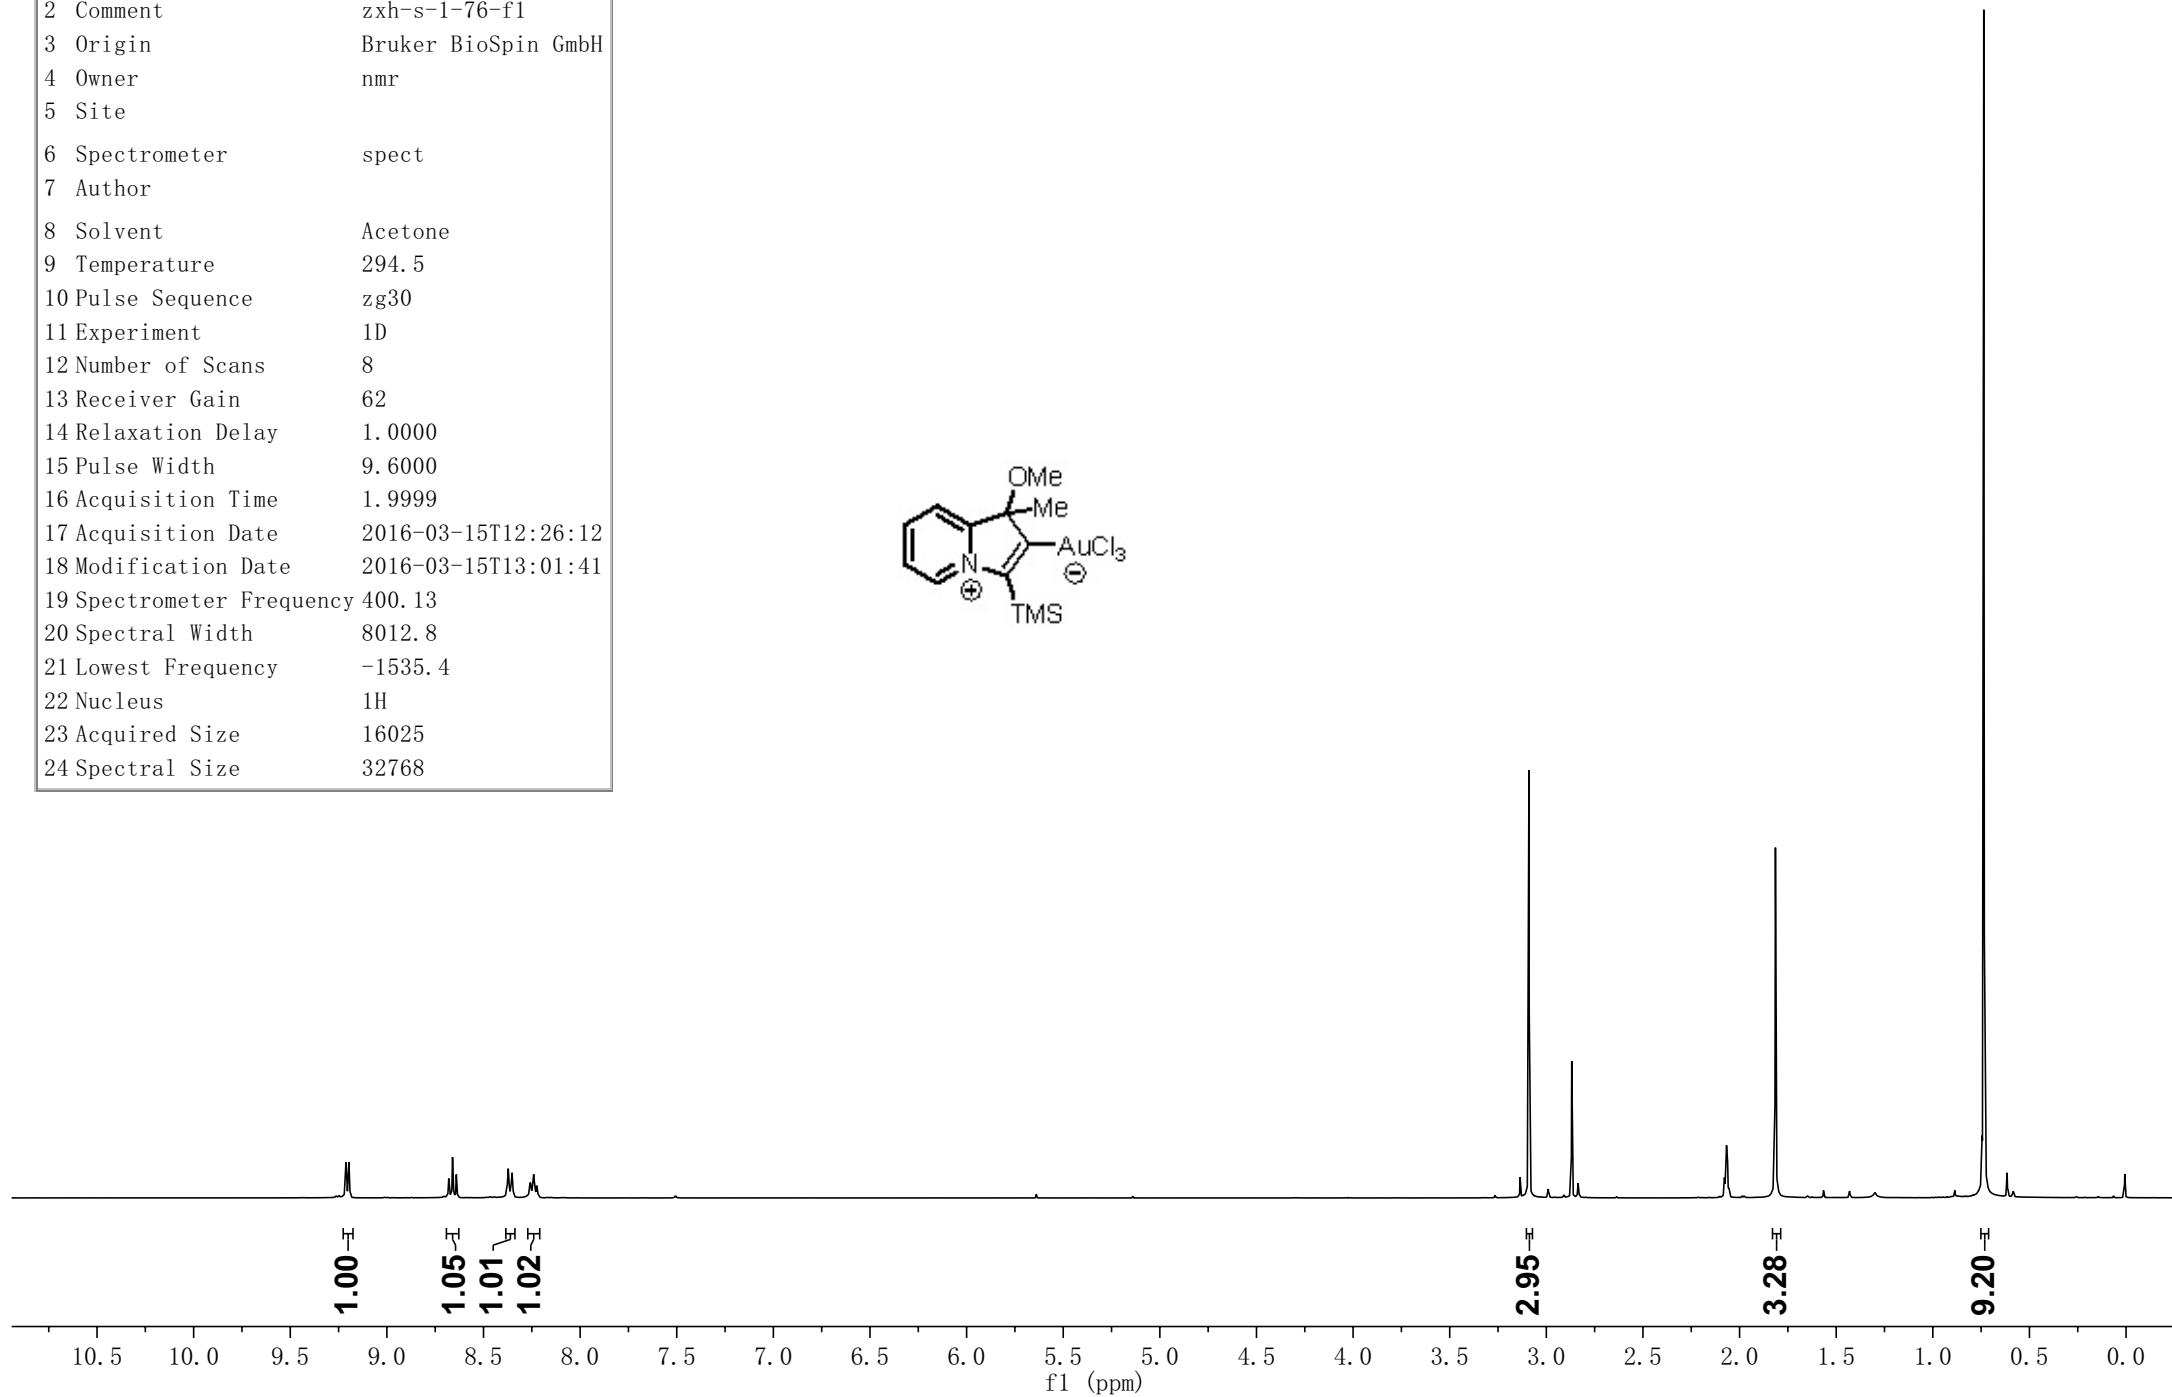

158.79  
158.32

143.31  
142.37  
138.16

128.16  
123.44

90.77

25.55

0.60

| Parameter                 | Value               |
|---------------------------|---------------------|
| 1 Title                   | zxx-s-1-76-f1-13C   |
| 2 Comment                 | zxx-s-1-76-f1-13C   |
| 3 Origin                  | Bruker BioSpin GmbH |
| 4 Owner                   | nmr                 |
| 5 Site                    |                     |
| 6 Spectrometer            | spect               |
| 7 Author                  |                     |
| 8 Solvent                 | Acetone             |
| 9 Temperature             | 294.5               |
| 10 Pulse Sequence         | zgpg30              |
| 11 Experiment             | 1D                  |
| 12 Number of Scans        | 473                 |
| 13 Receiver Gain          | 196                 |
| 14 Relaxation Delay       | 2.0000              |
| 15 Pulse Width            | 10.0000             |
| 16 Acquisition Time       | 1.3631              |
| 17 Acquisition Date       | 2016-03-15T12:29:27 |
| 18 Modification Date      | 2016-03-15T13:01:43 |
| 19 Spectrometer Frequency | 100.61              |
| 20 Spectral Width         | 24038.5             |
| 21 Lowest Frequency       | -1958.0             |
| 22 Nucleus                | 13C                 |
| 23 Acquired Size          | 32768               |
| 24 Spectral Size          | 65536               |

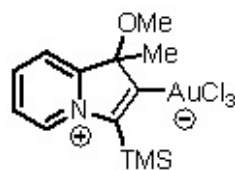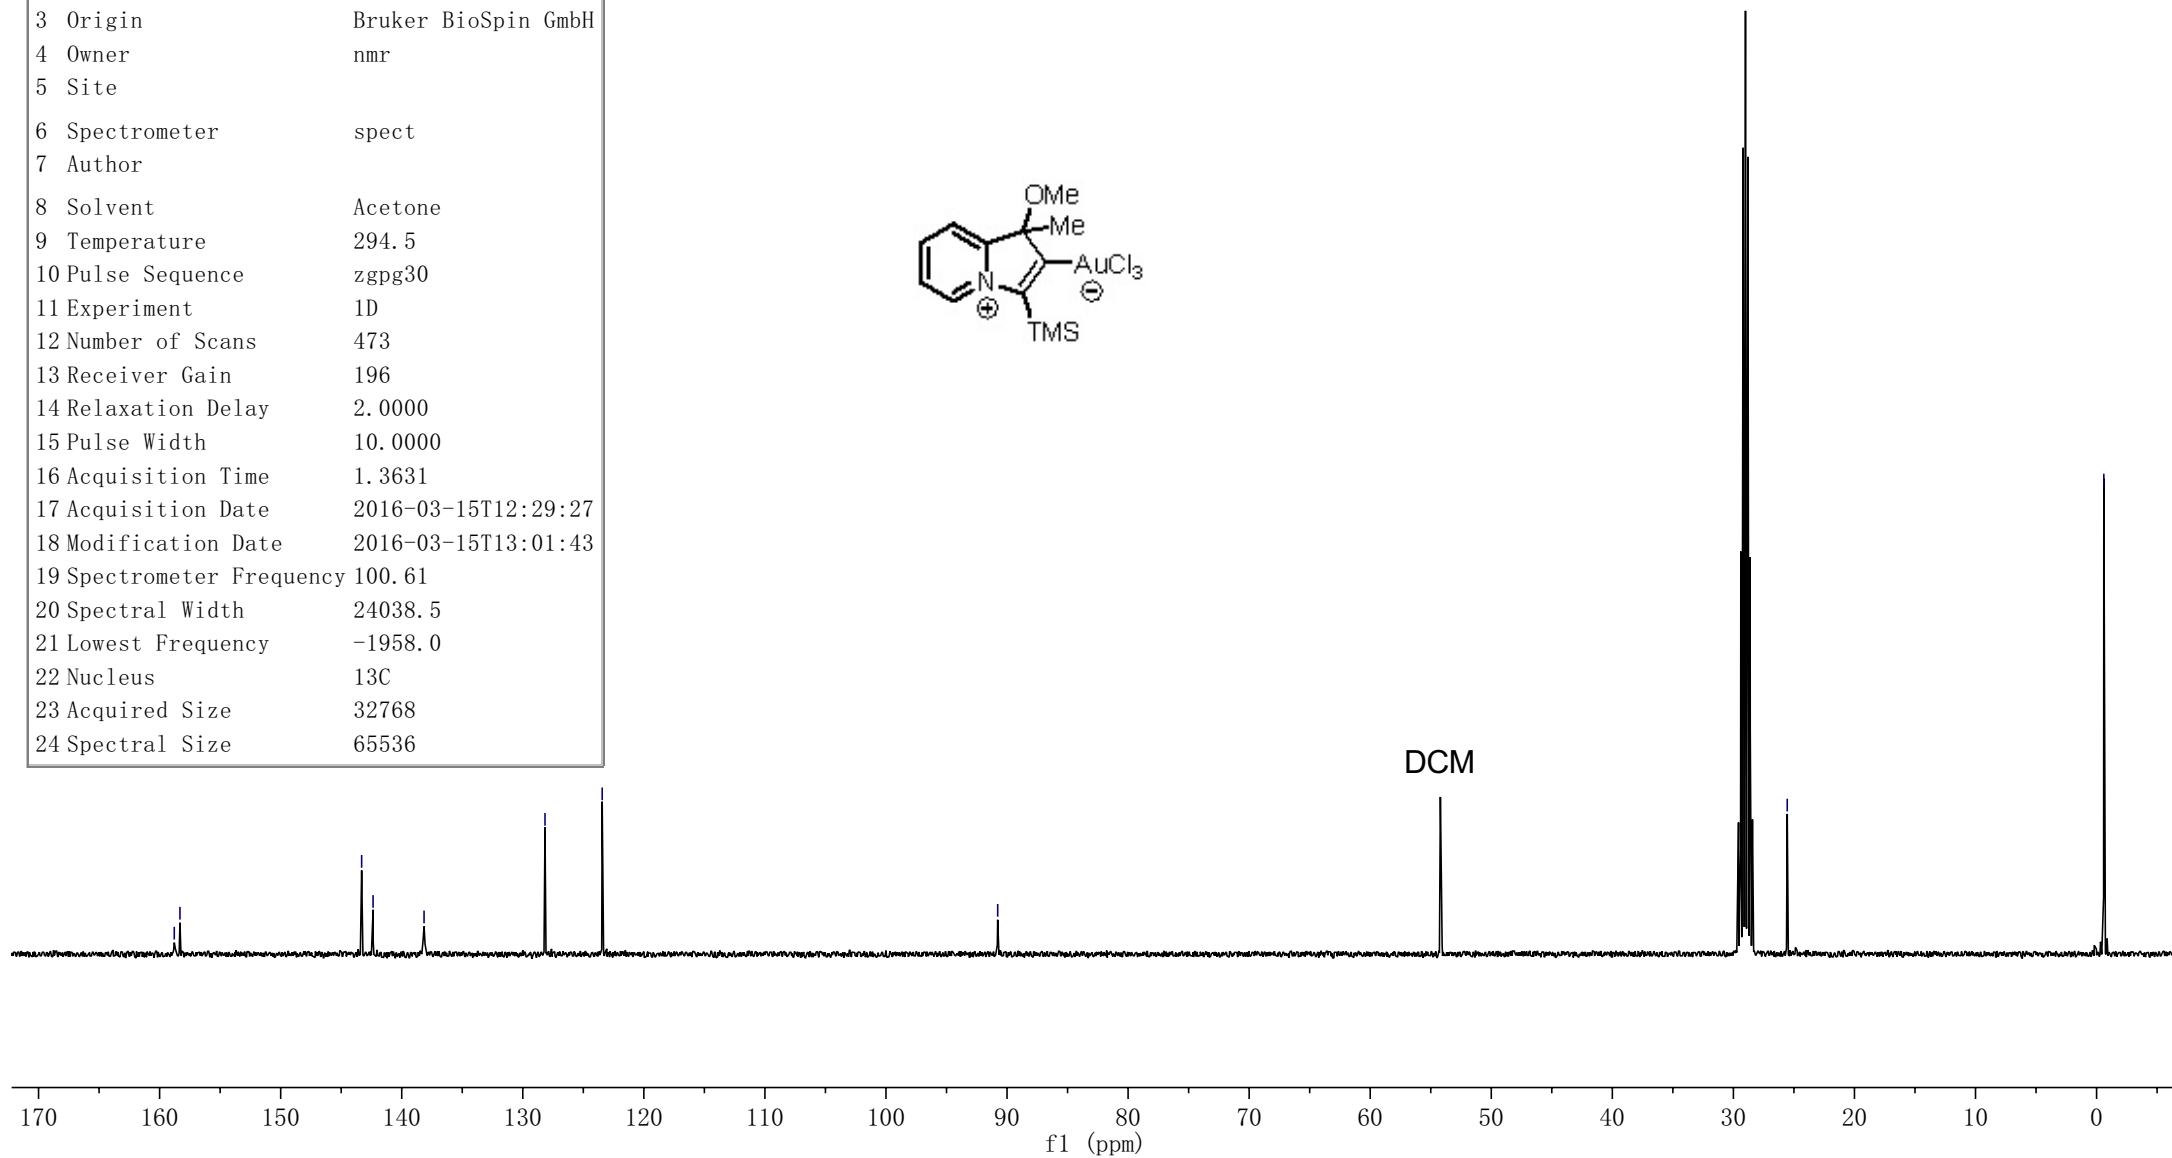

| Parameter                 | Value               |
|---------------------------|---------------------|
| 1 Title                   | zxh-s-1-117-2-F1    |
| 2 Comment                 | zxh-s-1-117-2-F1    |
| 3 Origin                  | Bruker BioSpin GmbH |
| 4 Owner                   | nmr                 |
| 5 Site                    |                     |
| 6 Spectrometer            | spect               |
| 7 Author                  |                     |
| 8 Solvent                 | Acetone             |
| 9 Temperature             | 299.6               |
| 10 Pulse Sequence         | zg30                |
| 11 Experiment             | 1D                  |
| 12 Number of Scans        | 11                  |
| 13 Receiver Gain          | 155                 |
| 14 Relaxation Delay       | 1.0000              |
| 15 Pulse Width            | 9.6000              |
| 16 Acquisition Time       | 1.9999              |
| 17 Acquisition Date       | 2016-05-09T22:13:49 |
| 18 Modification Date      | 2016-05-10T09:09:39 |
| 19 Spectrometer Frequency | 400.13              |
| 20 Spectral Width         | 8012.8              |
| 21 Lowest Frequency       | -1535.4             |
| 22 Nucleus                | <sup>1</sup> H      |
| 23 Acquired Size          | 16025               |
| 24 Spectral Size          | 32768               |

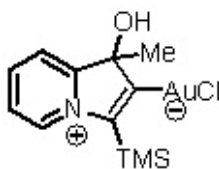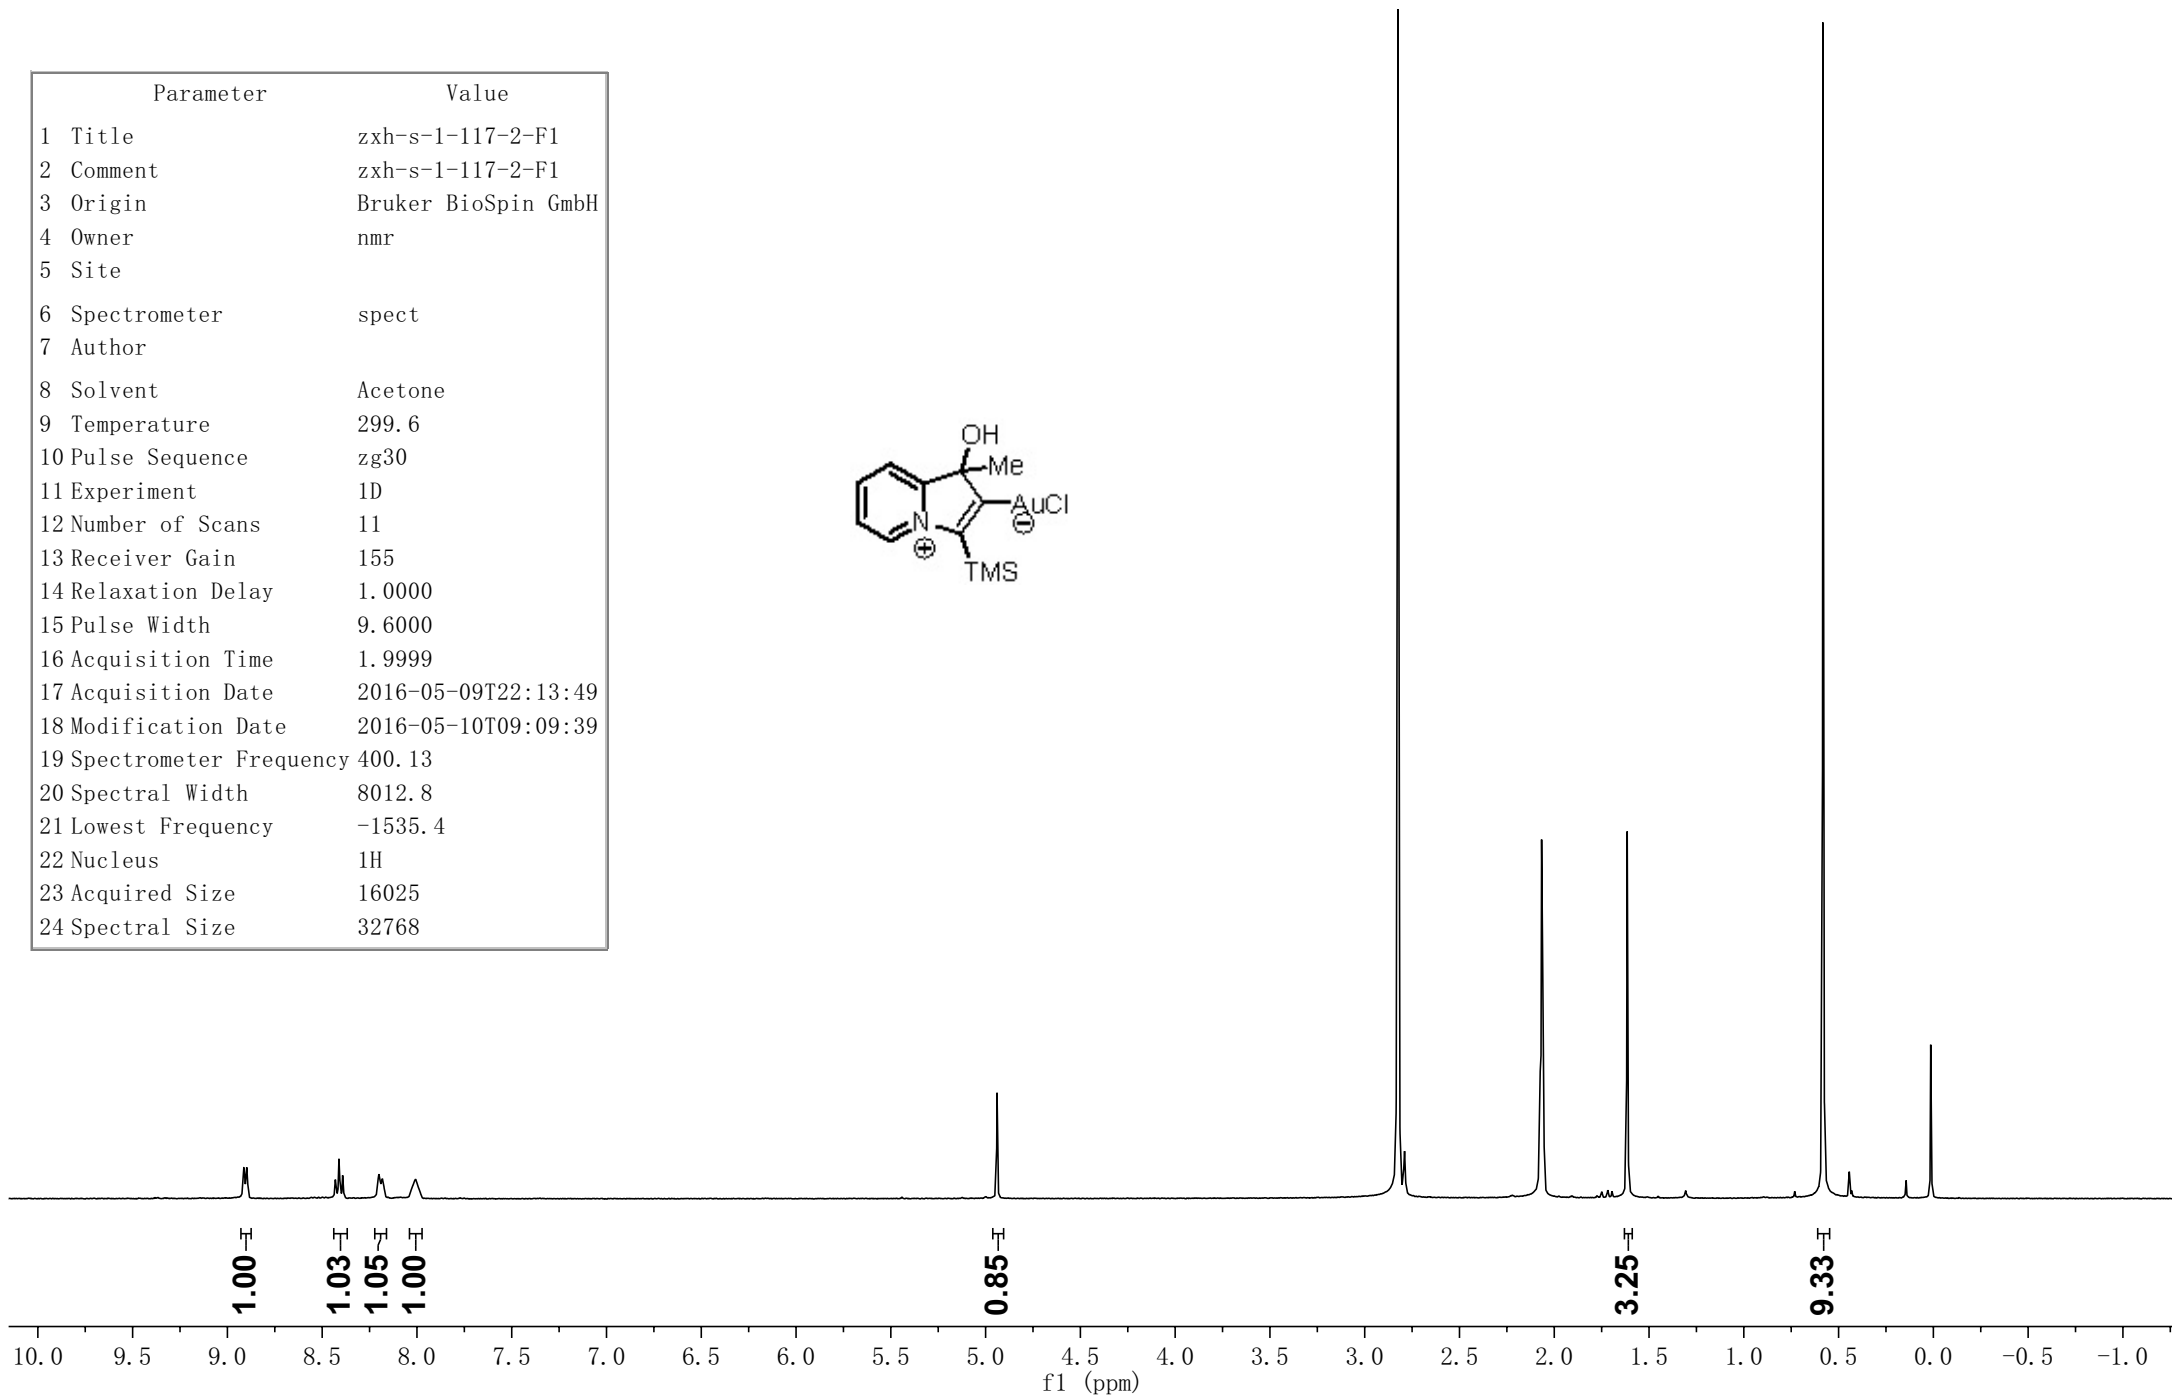

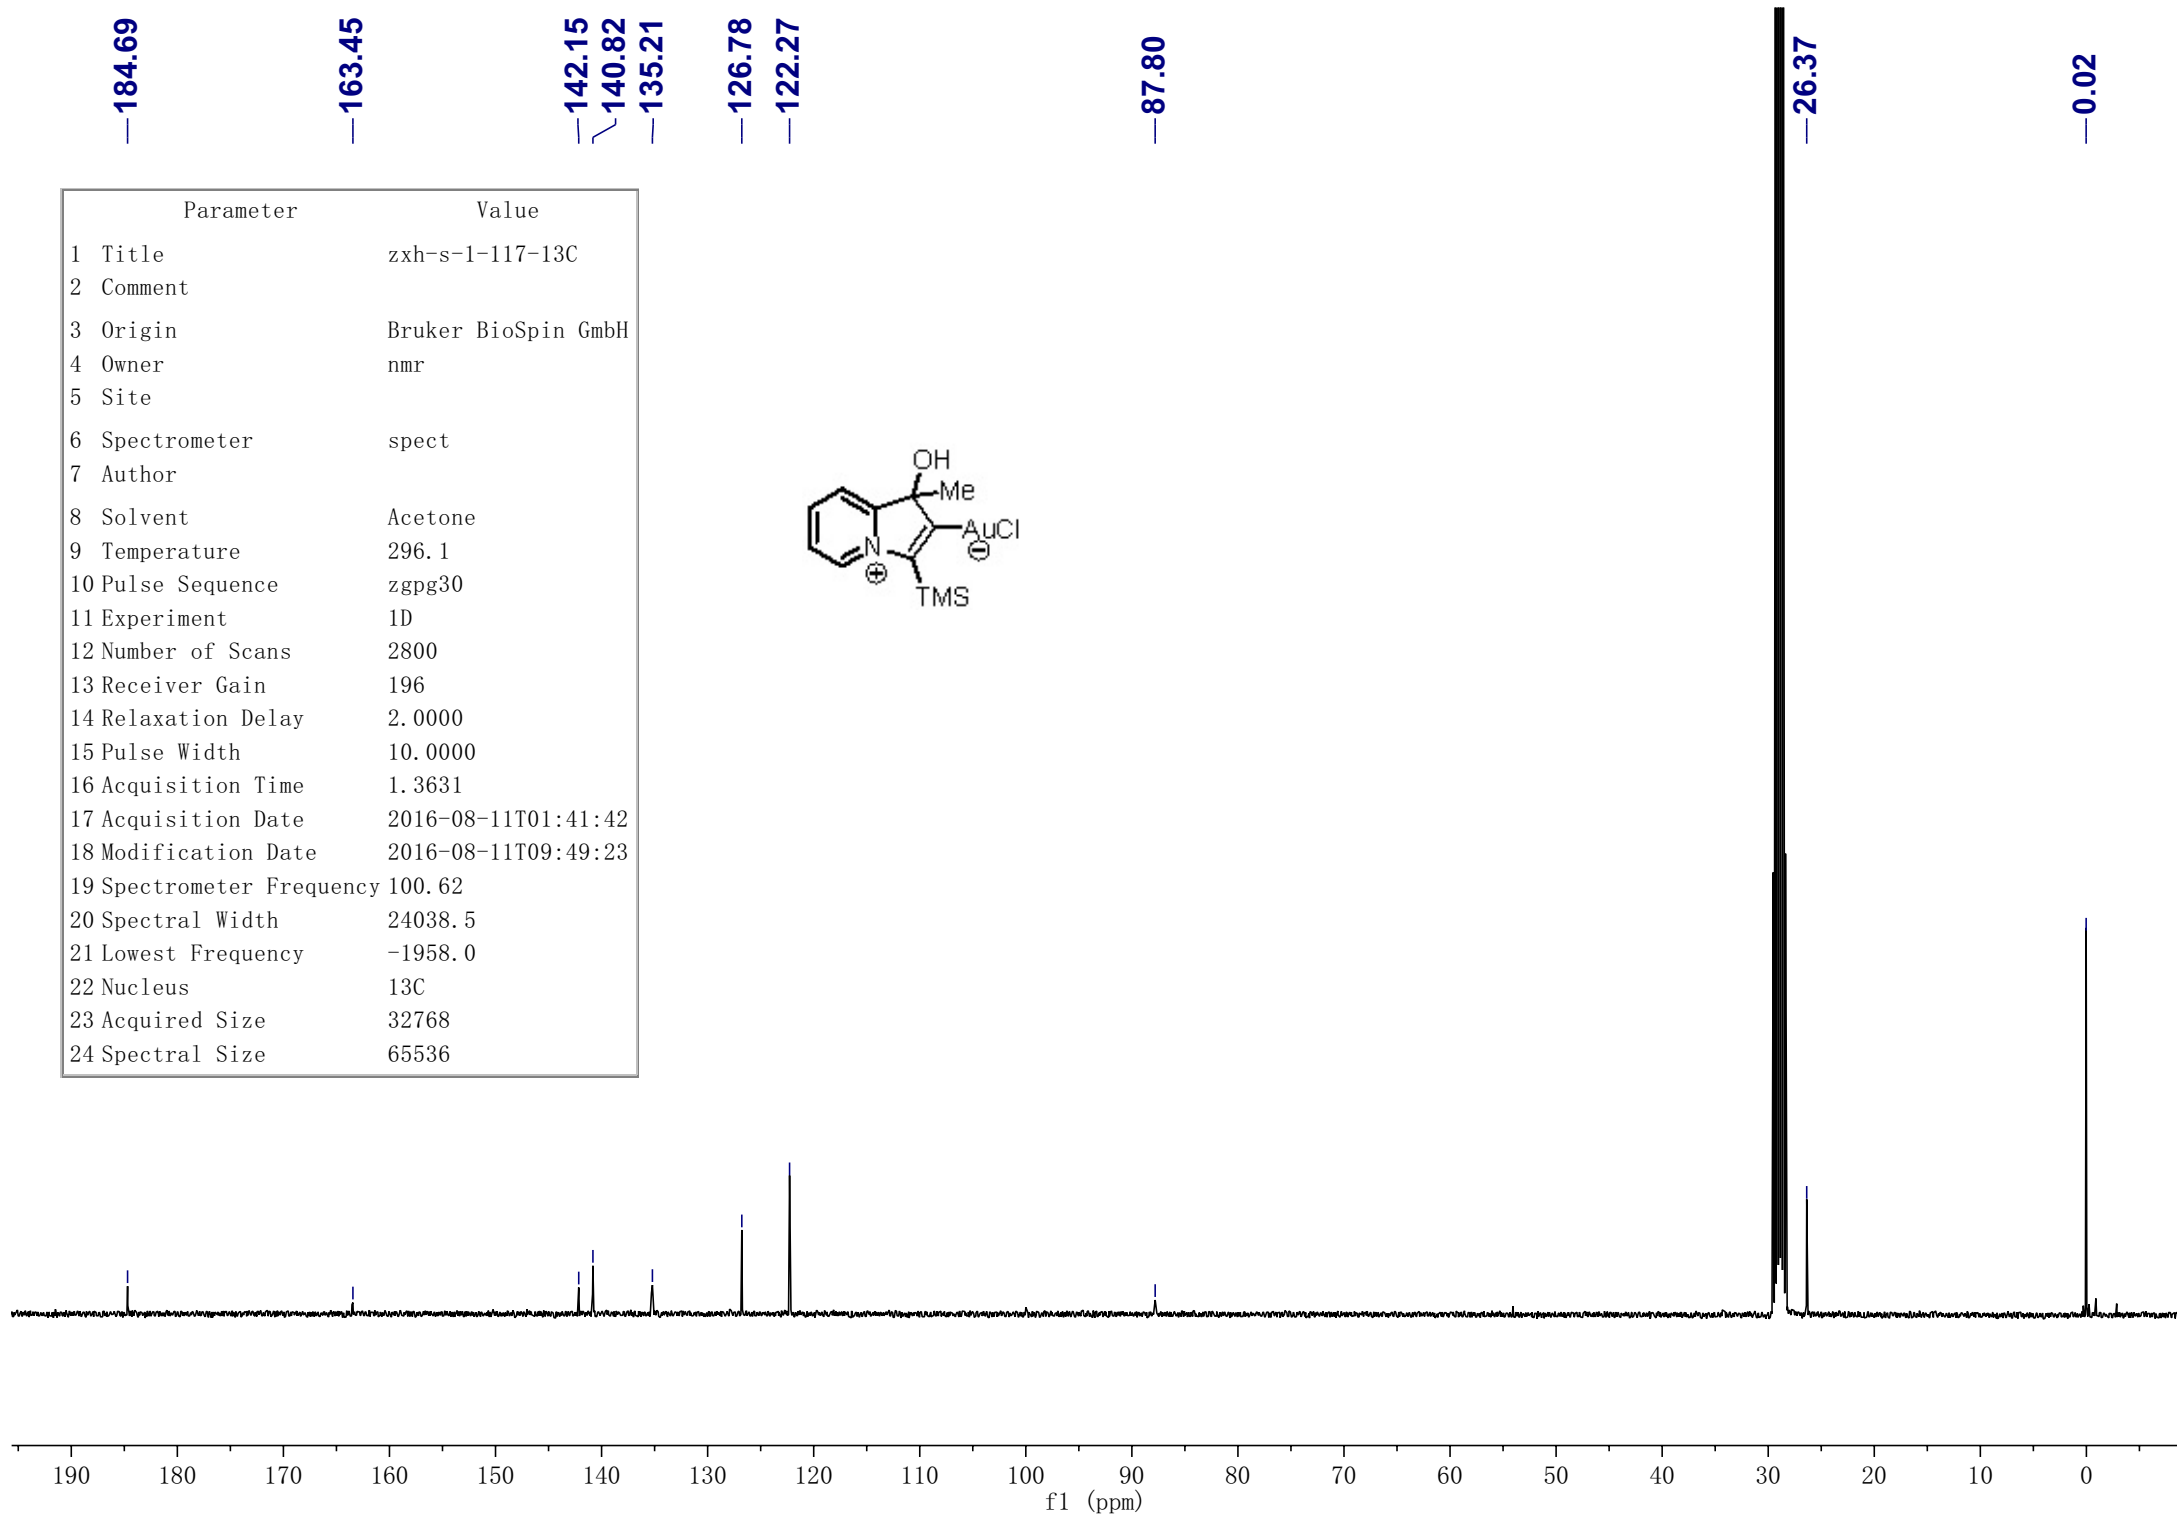

| Parameter                 | Value               |
|---------------------------|---------------------|
| 1 Title                   | YJ-01-130-ACETONE   |
| 2 Comment                 |                     |
| 3 Origin                  | Bruker BioSpin GmbH |
| 4 Owner                   | nmr                 |
| 5 Site                    |                     |
| 6 Spectrometer            | spect               |
| 7 Author                  |                     |
| 8 Solvent                 | Acetone             |
| 9 Temperature             | 295.6               |
| 10 Pulse Sequence         | zg30                |
| 11 Experiment             | 1D                  |
| 12 Number of Scans        | 32                  |
| 13 Receiver Gain          | 174                 |
| 14 Relaxation Delay       | 1.0000              |
| 15 Pulse Width            | 8.7300              |
| 16 Acquisition Time       | 1.9999              |
| 17 Acquisition Date       | 2018-07-02T17:36:07 |
| 18 Modification Date      | 2018-07-03T14:42:49 |
| 19 Spectrometer Frequency | 400.13              |
| 20 Spectral Width         | 8012.8              |
| 21 Lowest Frequency       | -1535.4             |
| 22 Nucleus                | <sup>1</sup> H      |
| 23 Acquired Size          | 16025               |
| 24 Spectral Size          | 32768               |

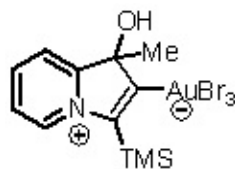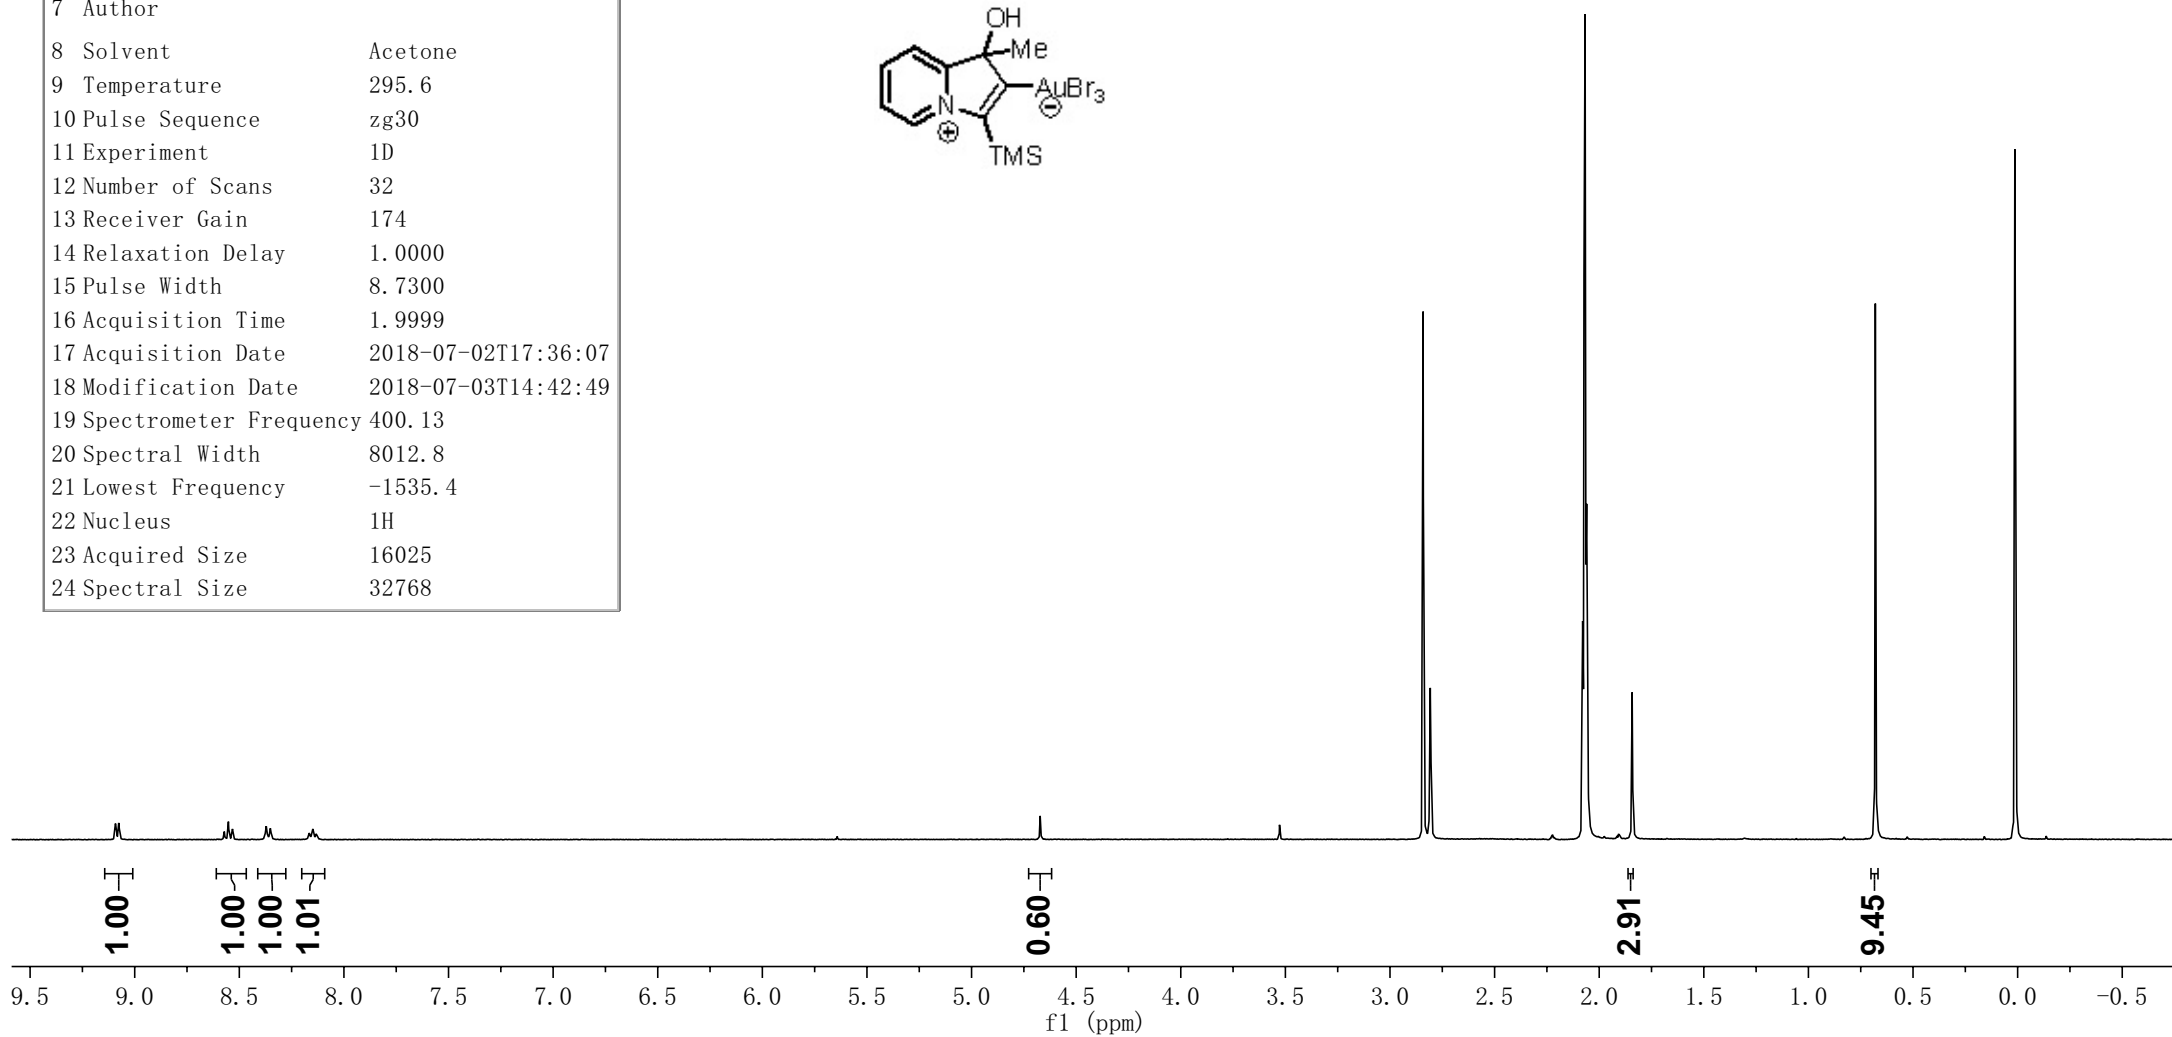

—159.80

~143.07

~139.53

~136.81

—127.30

—122.73

—84.34

—26.74

—0.74

| Parameter                 | Value               |
|---------------------------|---------------------|
| 1 Title                   | zxx-1-59_13C        |
| 2 Comment                 |                     |
| 3 Origin                  | Bruker BioSpin GmbH |
| 4 Owner                   | nmr                 |
| 5 Site                    |                     |
| 6 Spectrometer            | spect               |
| 7 Author                  |                     |
| 8 Solvent                 | Acetone             |
| 9 Temperature             | 296.2               |
| 10 Pulse Sequence         | zgpg30              |
| 11 Experiment             | 1D                  |
| 12 Number of Scans        | 500                 |
| 13 Receiver Gain          | 193                 |
| 14 Relaxation Delay       | 2.0000              |
| 15 Pulse Width            | 10.0000             |
| 16 Acquisition Time       | 1.0486              |
| 17 Acquisition Date       | 2016-01-19T05:49:37 |
| 18 Modification Date      | 2016-01-19T10:53:47 |
| 19 Spectrometer Frequency | 125.77              |
| 20 Spectral Width         | 31250.0             |
| 21 Lowest Frequency       | -3049.8             |
| 22 Nucleus                | 13C                 |
| 23 Acquired Size          | 32768               |
| 24 Spectral Size          | 65536               |

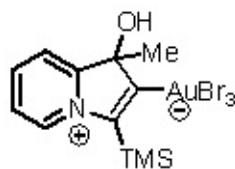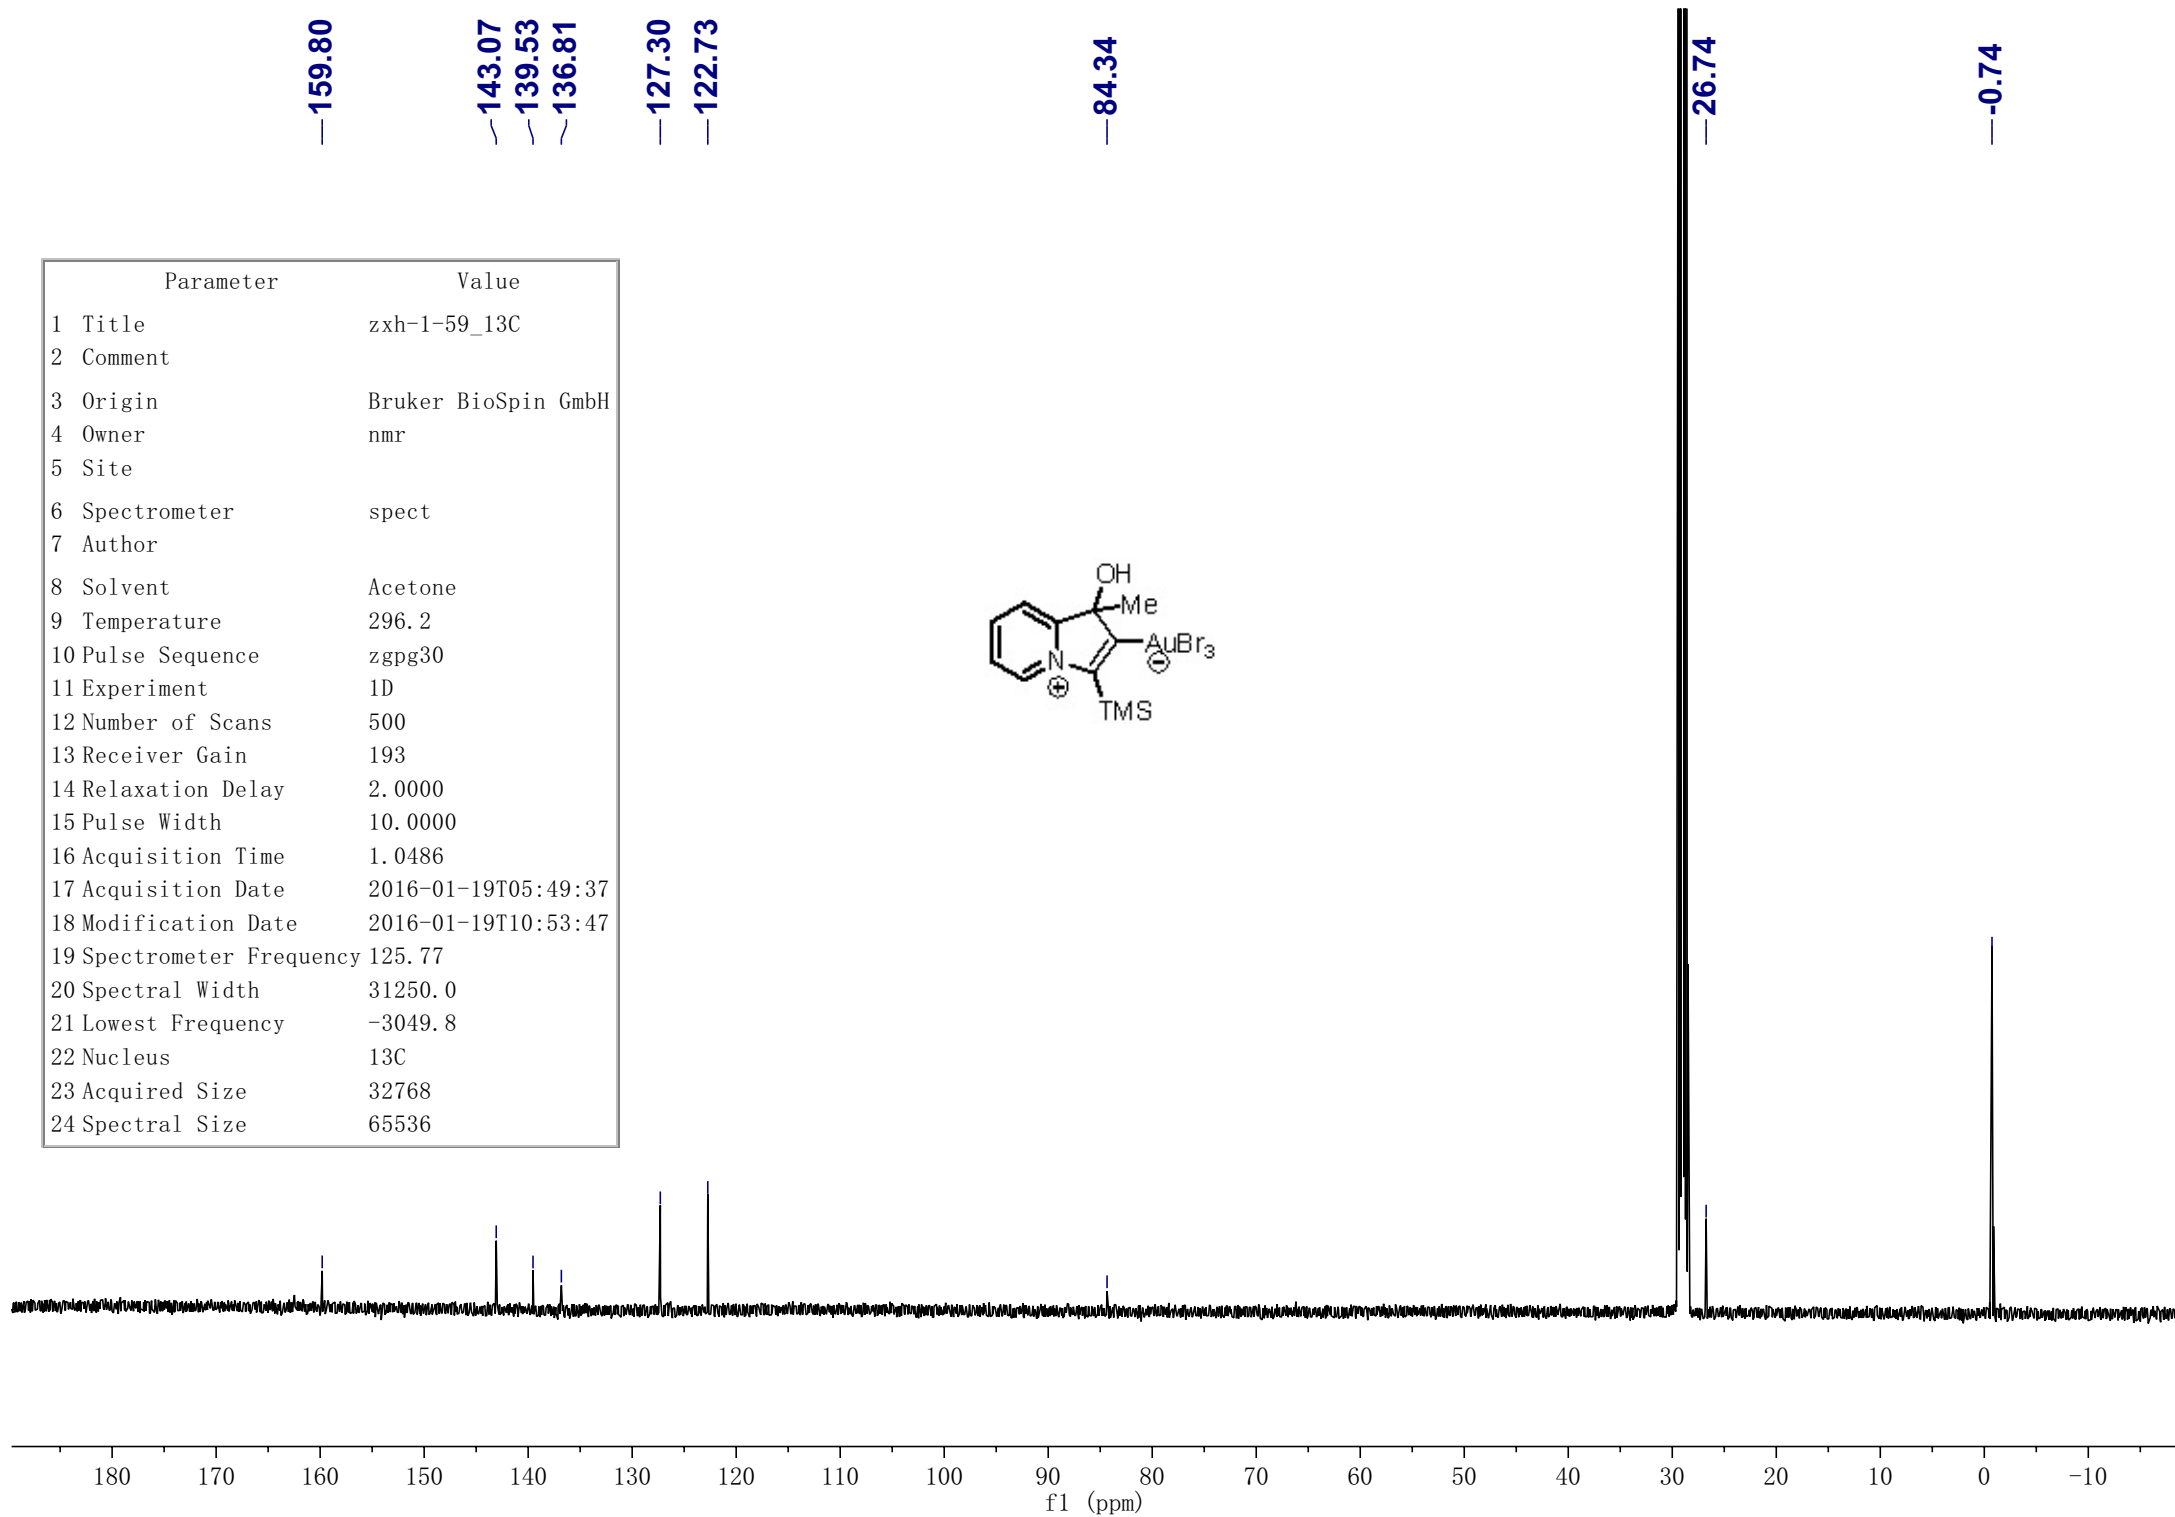

| Parameter                 | Value               |
|---------------------------|---------------------|
| 1 Title                   | YJ-01-101-F1-DMSO   |
| 2 Comment                 | YJ-01-101-F1-DMSO   |
| 3 Origin                  | Bruker BioSpin GmbH |
| 4 Owner                   | nmr                 |
| 5 Site                    |                     |
| 6 Spectrometer            | spect               |
| 7 Author                  |                     |
| 8 Solvent                 | DMSO                |
| 9 Temperature             | 293.1               |
| 10 Pulse Sequence         | zg30                |
| 11 Experiment             | 1D                  |
| 12 Number of Scans        | 32                  |
| 13 Receiver Gain          | 142                 |
| 14 Relaxation Delay       | 1.0000              |
| 15 Pulse Width            | 8.7300              |
| 16 Acquisition Time       | 1.9999              |
| 17 Acquisition Date       | 2018-02-24T12:46:40 |
| 18 Modification Date      | 2018-02-26T09:37:06 |
| 19 Spectrometer Frequency | 400.13              |
| 20 Spectral Width         | 8012.8              |
| 21 Lowest Frequency       | -1535.4             |
| 22 Nucleus                | <sup>1</sup> H      |
| 23 Acquired Size          | 16025               |
| 24 Spectral Size          | 32768               |

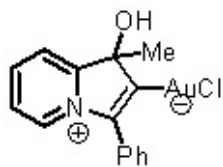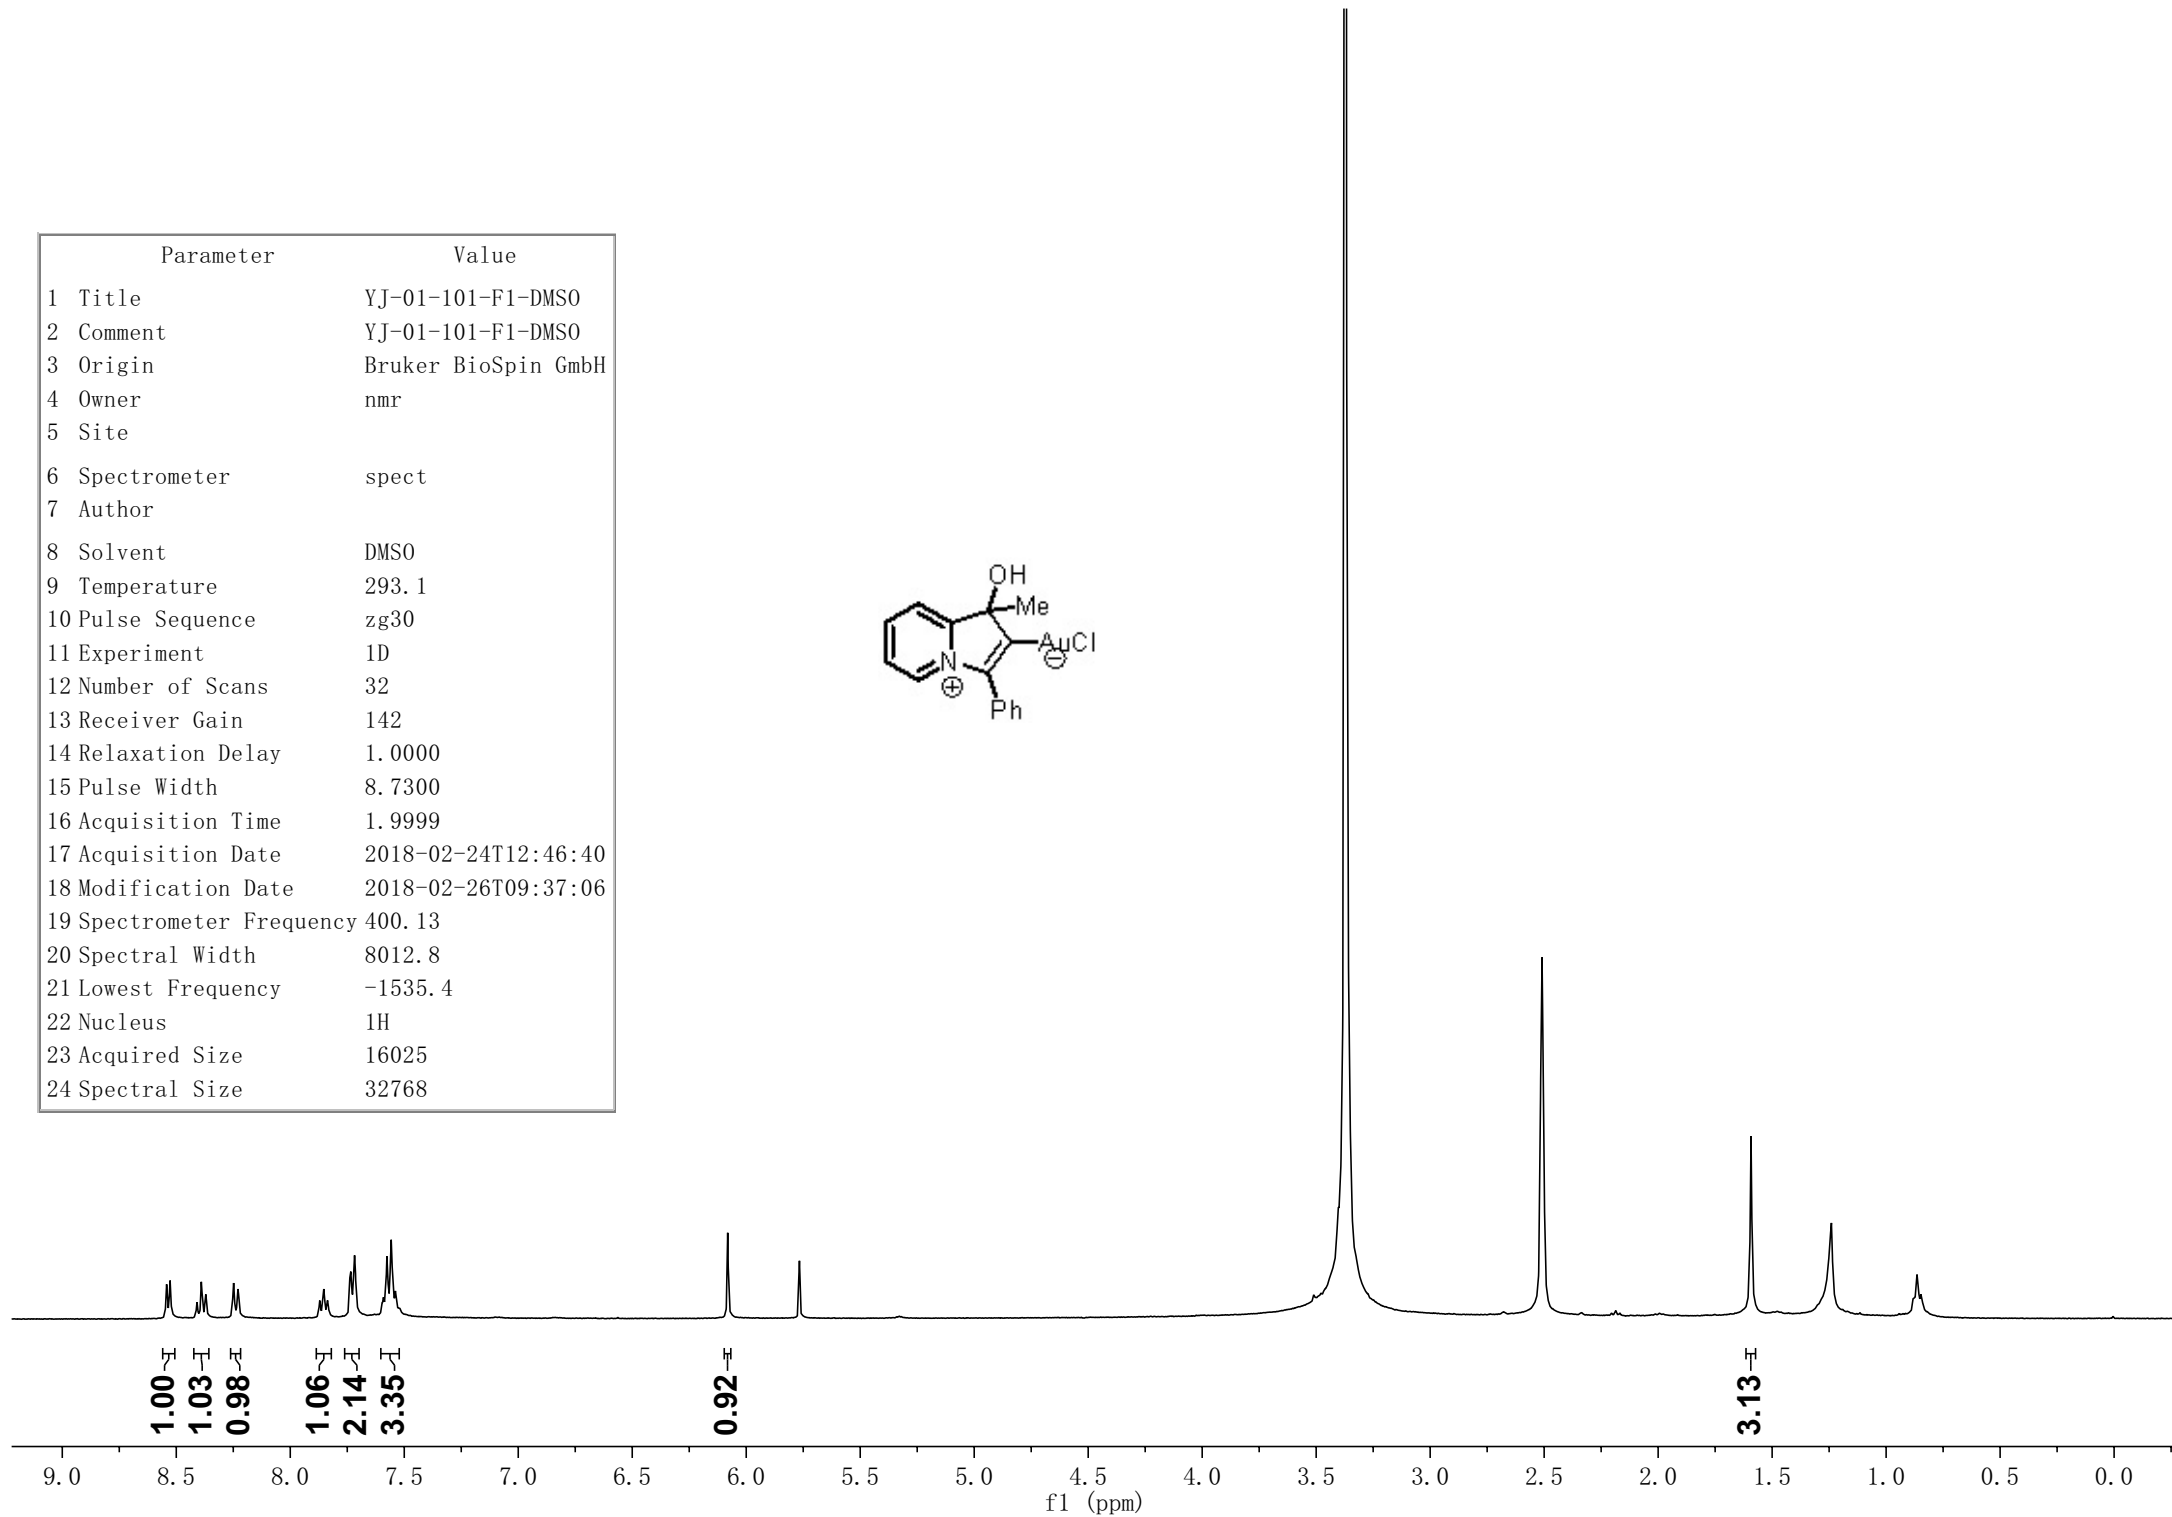

—168.64

—163.40

—142.12

—140.17

—133.51

—131.16

—130.42

—129.63

—129.36

—127.11

—122.54

—85.22

—26.59

| Parameter                 | Value               |
|---------------------------|---------------------|
| 1 Title                   | YJ-01-101-F1-DMSO   |
| 2 Comment                 |                     |
| 3 Origin                  | Bruker BioSpin GmbH |
| 4 Owner                   | nmr                 |
| 5 Site                    |                     |
| 6 Spectrometer            | spect               |
| 7 Author                  |                     |
| 8 Solvent                 | DMSO                |
| 9 Temperature             | 294.0               |
| 10 Pulse Sequence         | zgpg30              |
| 11 Experiment             | 1D                  |
| 12 Number of Scans        | 5632                |
| 13 Receiver Gain          | 196                 |
| 14 Relaxation Delay       | 2.0000              |
| 15 Pulse Width            | 10.0000             |
| 16 Acquisition Time       | 1.3631              |
| 17 Acquisition Date       | 2018-01-29T22:41:07 |
| 18 Modification Date      | 2018-01-30T11:17:31 |
| 19 Spectrometer Frequency | 100.61              |
| 20 Spectral Width         | 24038.5             |
| 21 Lowest Frequency       | -1956.8             |
| 22 Nucleus                | <sup>13</sup> C     |
| 23 Acquired Size          | 32768               |
| 24 Spectral Size          | 65536               |

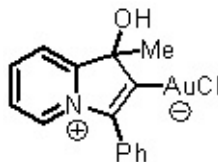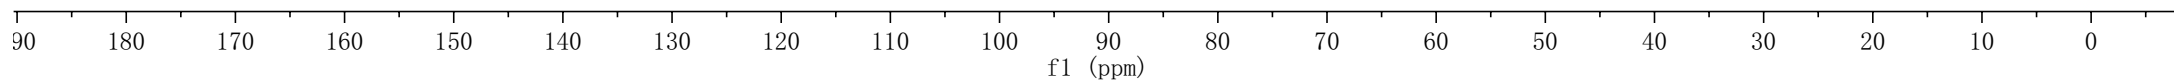

| Parameter                 | Value               |
|---------------------------|---------------------|
| 1 Title                   | YJ-01-08-DMSO       |
| 2 Comment                 | YJ-01-08-DMSO       |
| 3 Origin                  | Bruker BioSpin GmbH |
| 4 Owner                   | nmr                 |
| 5 Site                    |                     |
| 6 Spectrometer            | spect               |
| 7 Author                  |                     |
| 8 Solvent                 | DMSO                |
| 9 Temperature             | 295.3               |
| 10 Pulse Sequence         | zg30                |
| 11 Experiment             | 1D                  |
| 12 Number of Scans        | 32                  |
| 13 Receiver Gain          | 155                 |
| 14 Relaxation Delay       | 1.0000              |
| 15 Pulse Width            | 9.6000              |
| 16 Acquisition Time       | 1.9999              |
| 17 Acquisition Date       | 2016-08-03T23:34:00 |
| 18 Modification Date      | 2017-07-25T20:00:07 |
| 19 Spectrometer Frequency | 400.13              |
| 20 Spectral Width         | 8012.8              |
| 21 Lowest Frequency       | -1535.4             |
| 22 Nucleus                | <sup>1</sup> H      |
| 23 Acquired Size          | 16025               |
| 24 Spectral Size          | 32768               |

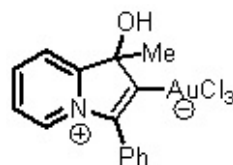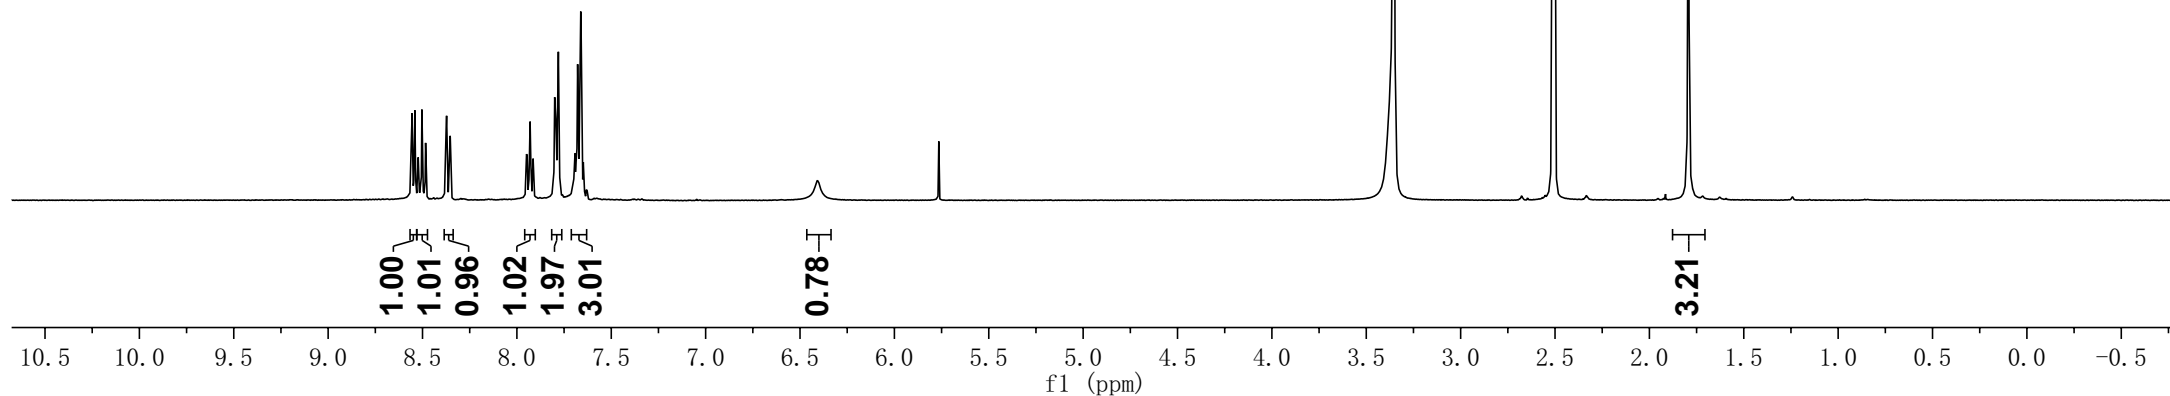

161.51  
145.71  
144.31  
136.02  
135.21  
131.02  
130.87  
129.82  
127.56  
127.46  
122.96

82.74

26.16

| Parameter                 | Value               |
|---------------------------|---------------------|
| 1 Title                   | YJ-01-08-DMSO-C     |
| 2 Comment                 |                     |
| 3 Origin                  | Bruker BioSpin GmbH |
| 4 Owner                   | nmr                 |
| 5 Site                    |                     |
| 6 Spectrometer            | spect               |
| 7 Author                  |                     |
| 8 Solvent                 | DMSO                |
| 9 Temperature             | 295.1               |
| 10 Pulse Sequence         | zgpg30              |
| 11 Experiment             | 1D                  |
| 12 Number of Scans        | 1024                |
| 13 Receiver Gain          | 196                 |
| 14 Relaxation Delay       | 2.0000              |
| 15 Pulse Width            | 10.0000             |
| 16 Acquisition Time       | 1.3631              |
| 17 Acquisition Date       | 2016-08-04T07:18:23 |
| 18 Modification Date      | 2017-07-25T20:00:08 |
| 19 Spectrometer Frequency | 100.62              |
| 20 Spectral Width         | 24038.5             |
| 21 Lowest Frequency       | -1958.0             |
| 22 Nucleus                | <sup>13</sup> C     |
| 23 Acquired Size          | 32768               |
| 24 Spectral Size          | 65536               |

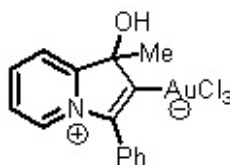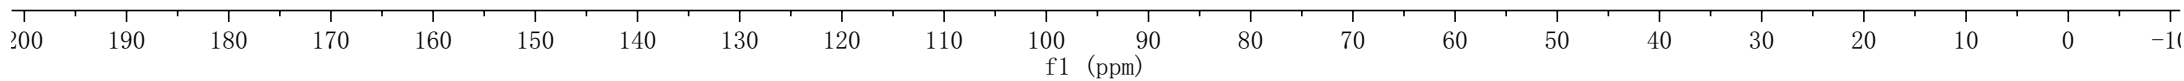

| Parameter                 | Value               |
|---------------------------|---------------------|
| 1 Title                   | YJ-01-89-H          |
| 2 Comment                 |                     |
| 3 Origin                  | Bruker BioSpin GmbH |
| 4 Owner                   | nmr                 |
| 5 Site                    |                     |
| 6 Spectrometer            | spect               |
| 7 Author                  |                     |
| 8 Solvent                 | DMSO                |
| 9 Temperature             | 296.1               |
| 10 Pulse Sequence         | zg30                |
| 11 Experiment             | 1D                  |
| 12 Number of Scans        | 18                  |
| 13 Receiver Gain          | 95                  |
| 14 Relaxation Delay       | 1.0000              |
| 15 Pulse Width            | 11.2900             |
| 16 Acquisition Time       | 3.2768              |
| 17 Acquisition Date       | 2017-11-08T13:27:37 |
| 18 Modification Date      | 2017-11-08T14:24:49 |
| 19 Spectrometer Frequency | 500.13              |
| 20 Spectral Width         | 10000.0             |
| 21 Lowest Frequency       | -1911.5             |
| 22 Nucleus                | <sup>1</sup> H      |
| 23 Acquired Size          | 32768               |
| 24 Spectral Size          | 65536               |

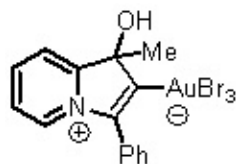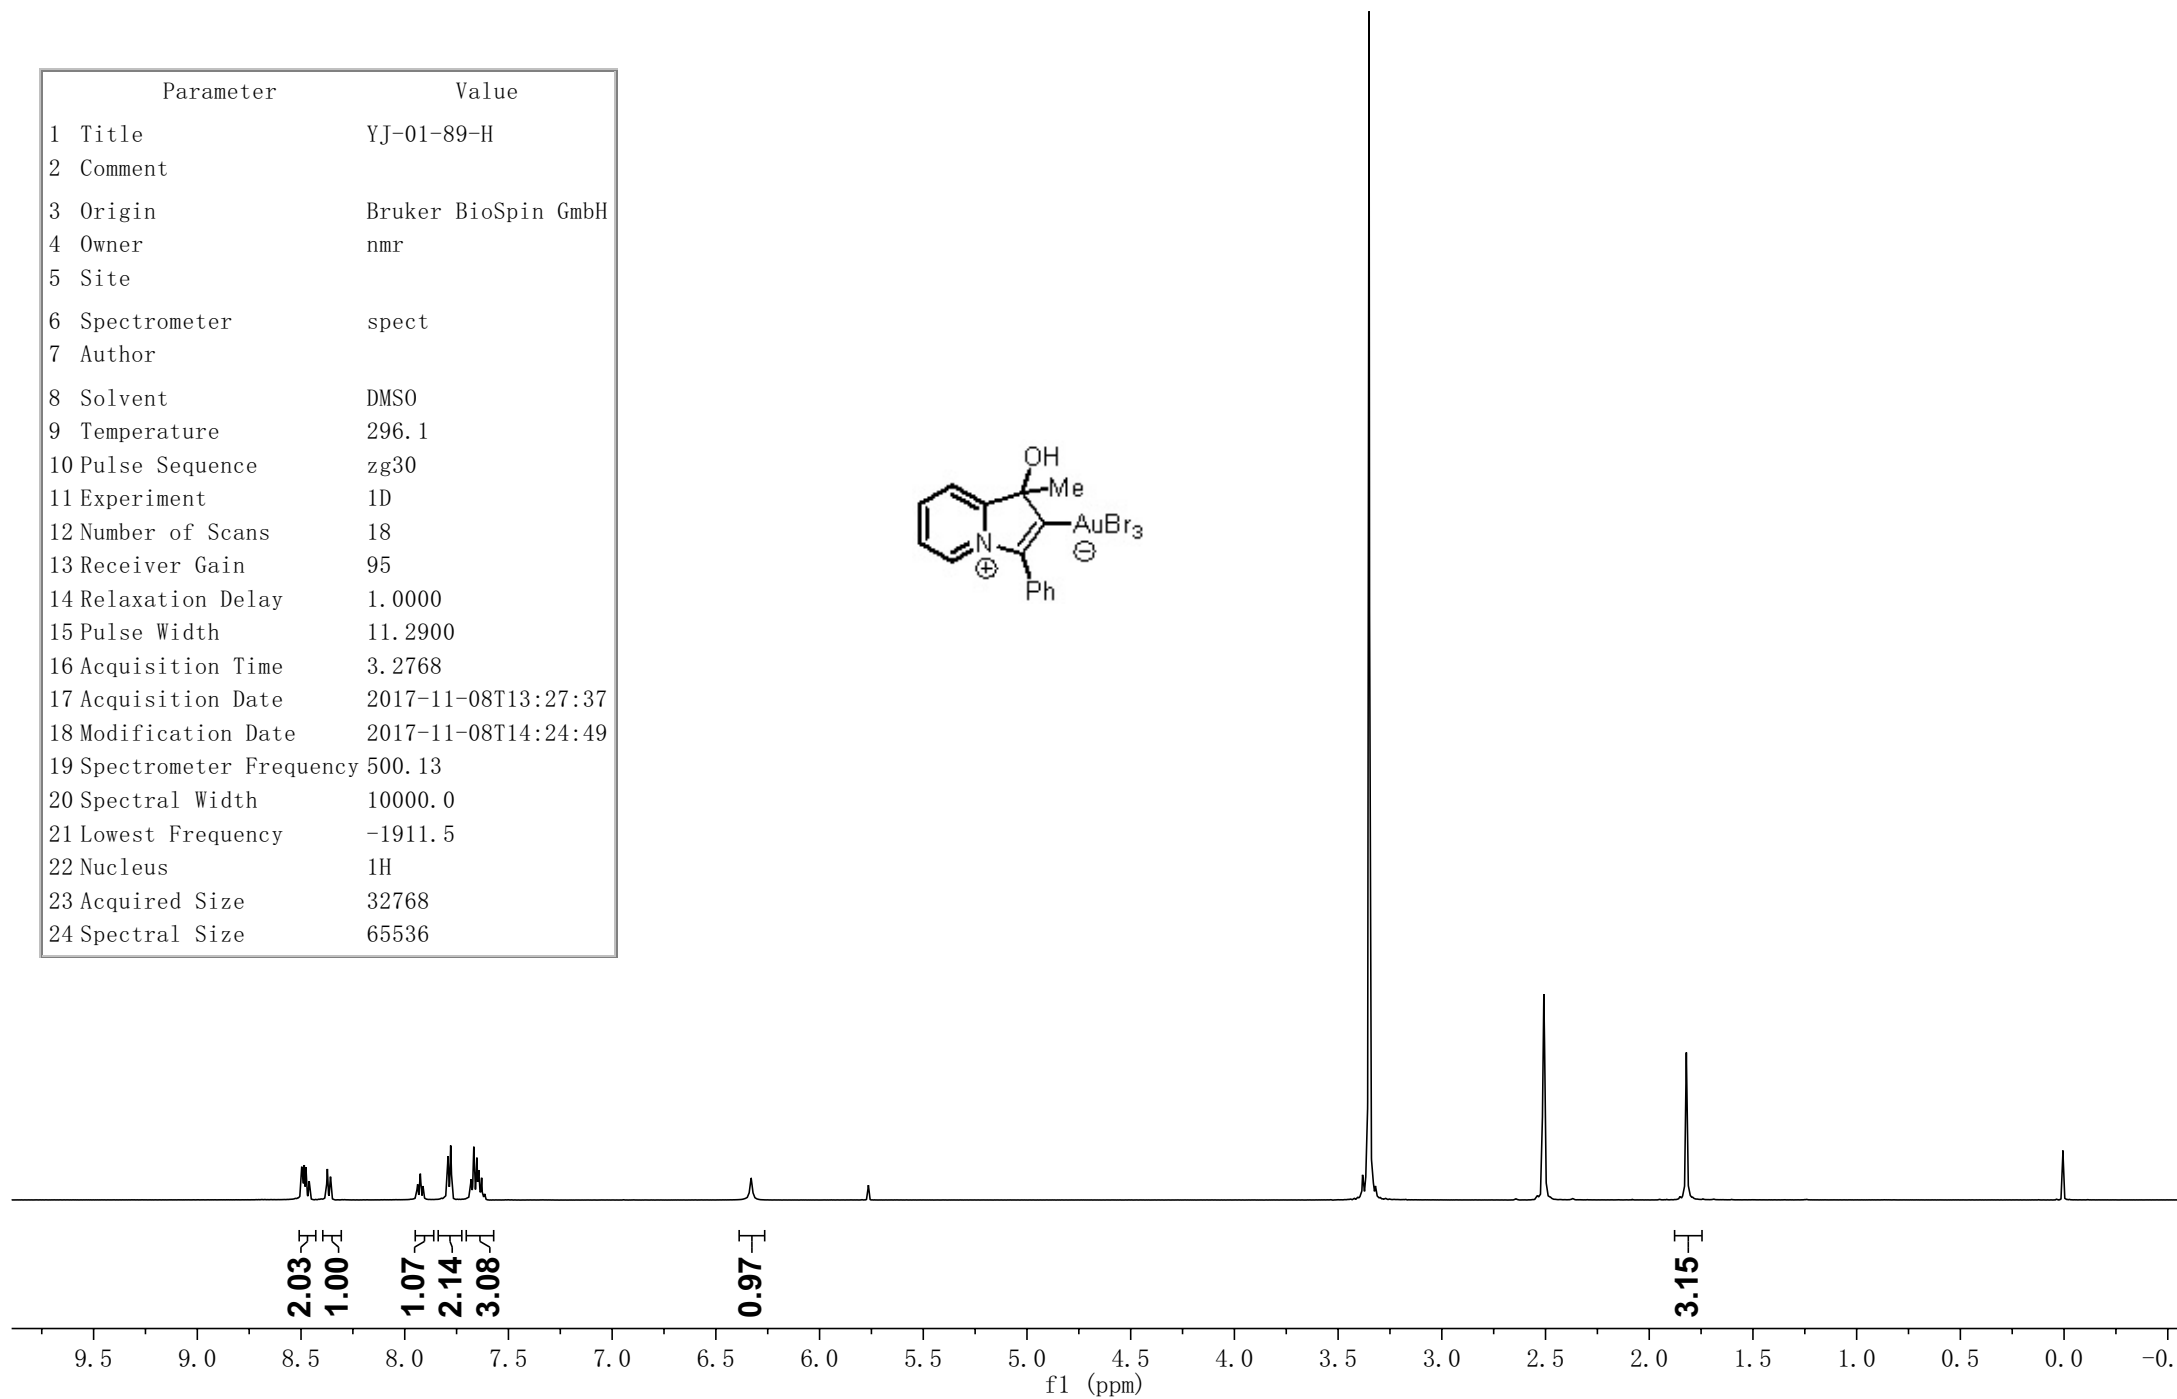

—161.69

—145.52

—144.11

—135.82

—134.99

—130.94

—129.73

—127.77

—127.38

—122.99

—82.59

—27.31

| Parameter                 | Value               |
|---------------------------|---------------------|
| 1 Title                   | YJ-01-89-13C        |
| 2 Comment                 |                     |
| 3 Origin                  | Bruker BioSpin GmbH |
| 4 Owner                   | nmr                 |
| 5 Site                    |                     |
| 6 Spectrometer            | spect               |
| 7 Author                  |                     |
| 8 Solvent                 | DMSO                |
| 9 Temperature             | 296.1               |
| 10 Pulse Sequence         | zgpg30              |
| 11 Experiment             | 1D                  |
| 12 Number of Scans        | 400                 |
| 13 Receiver Gain          | 193                 |
| 14 Relaxation Delay       | 2.0000              |
| 15 Pulse Width            | 9.6000              |
| 16 Acquisition Time       | 1.1010              |
| 17 Acquisition Date       | 2017-11-08T13:30:28 |
| 18 Modification Date      | 2017-11-08T14:24:48 |
| 19 Spectrometer Frequency | 125.76              |
| 20 Spectral Width         | 29761.9             |
| 21 Lowest Frequency       | -2305.8             |
| 22 Nucleus                | <sup>13</sup> C     |
| 23 Acquired Size          | 32768               |
| 24 Spectral Size          | 65536               |

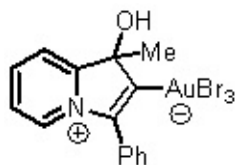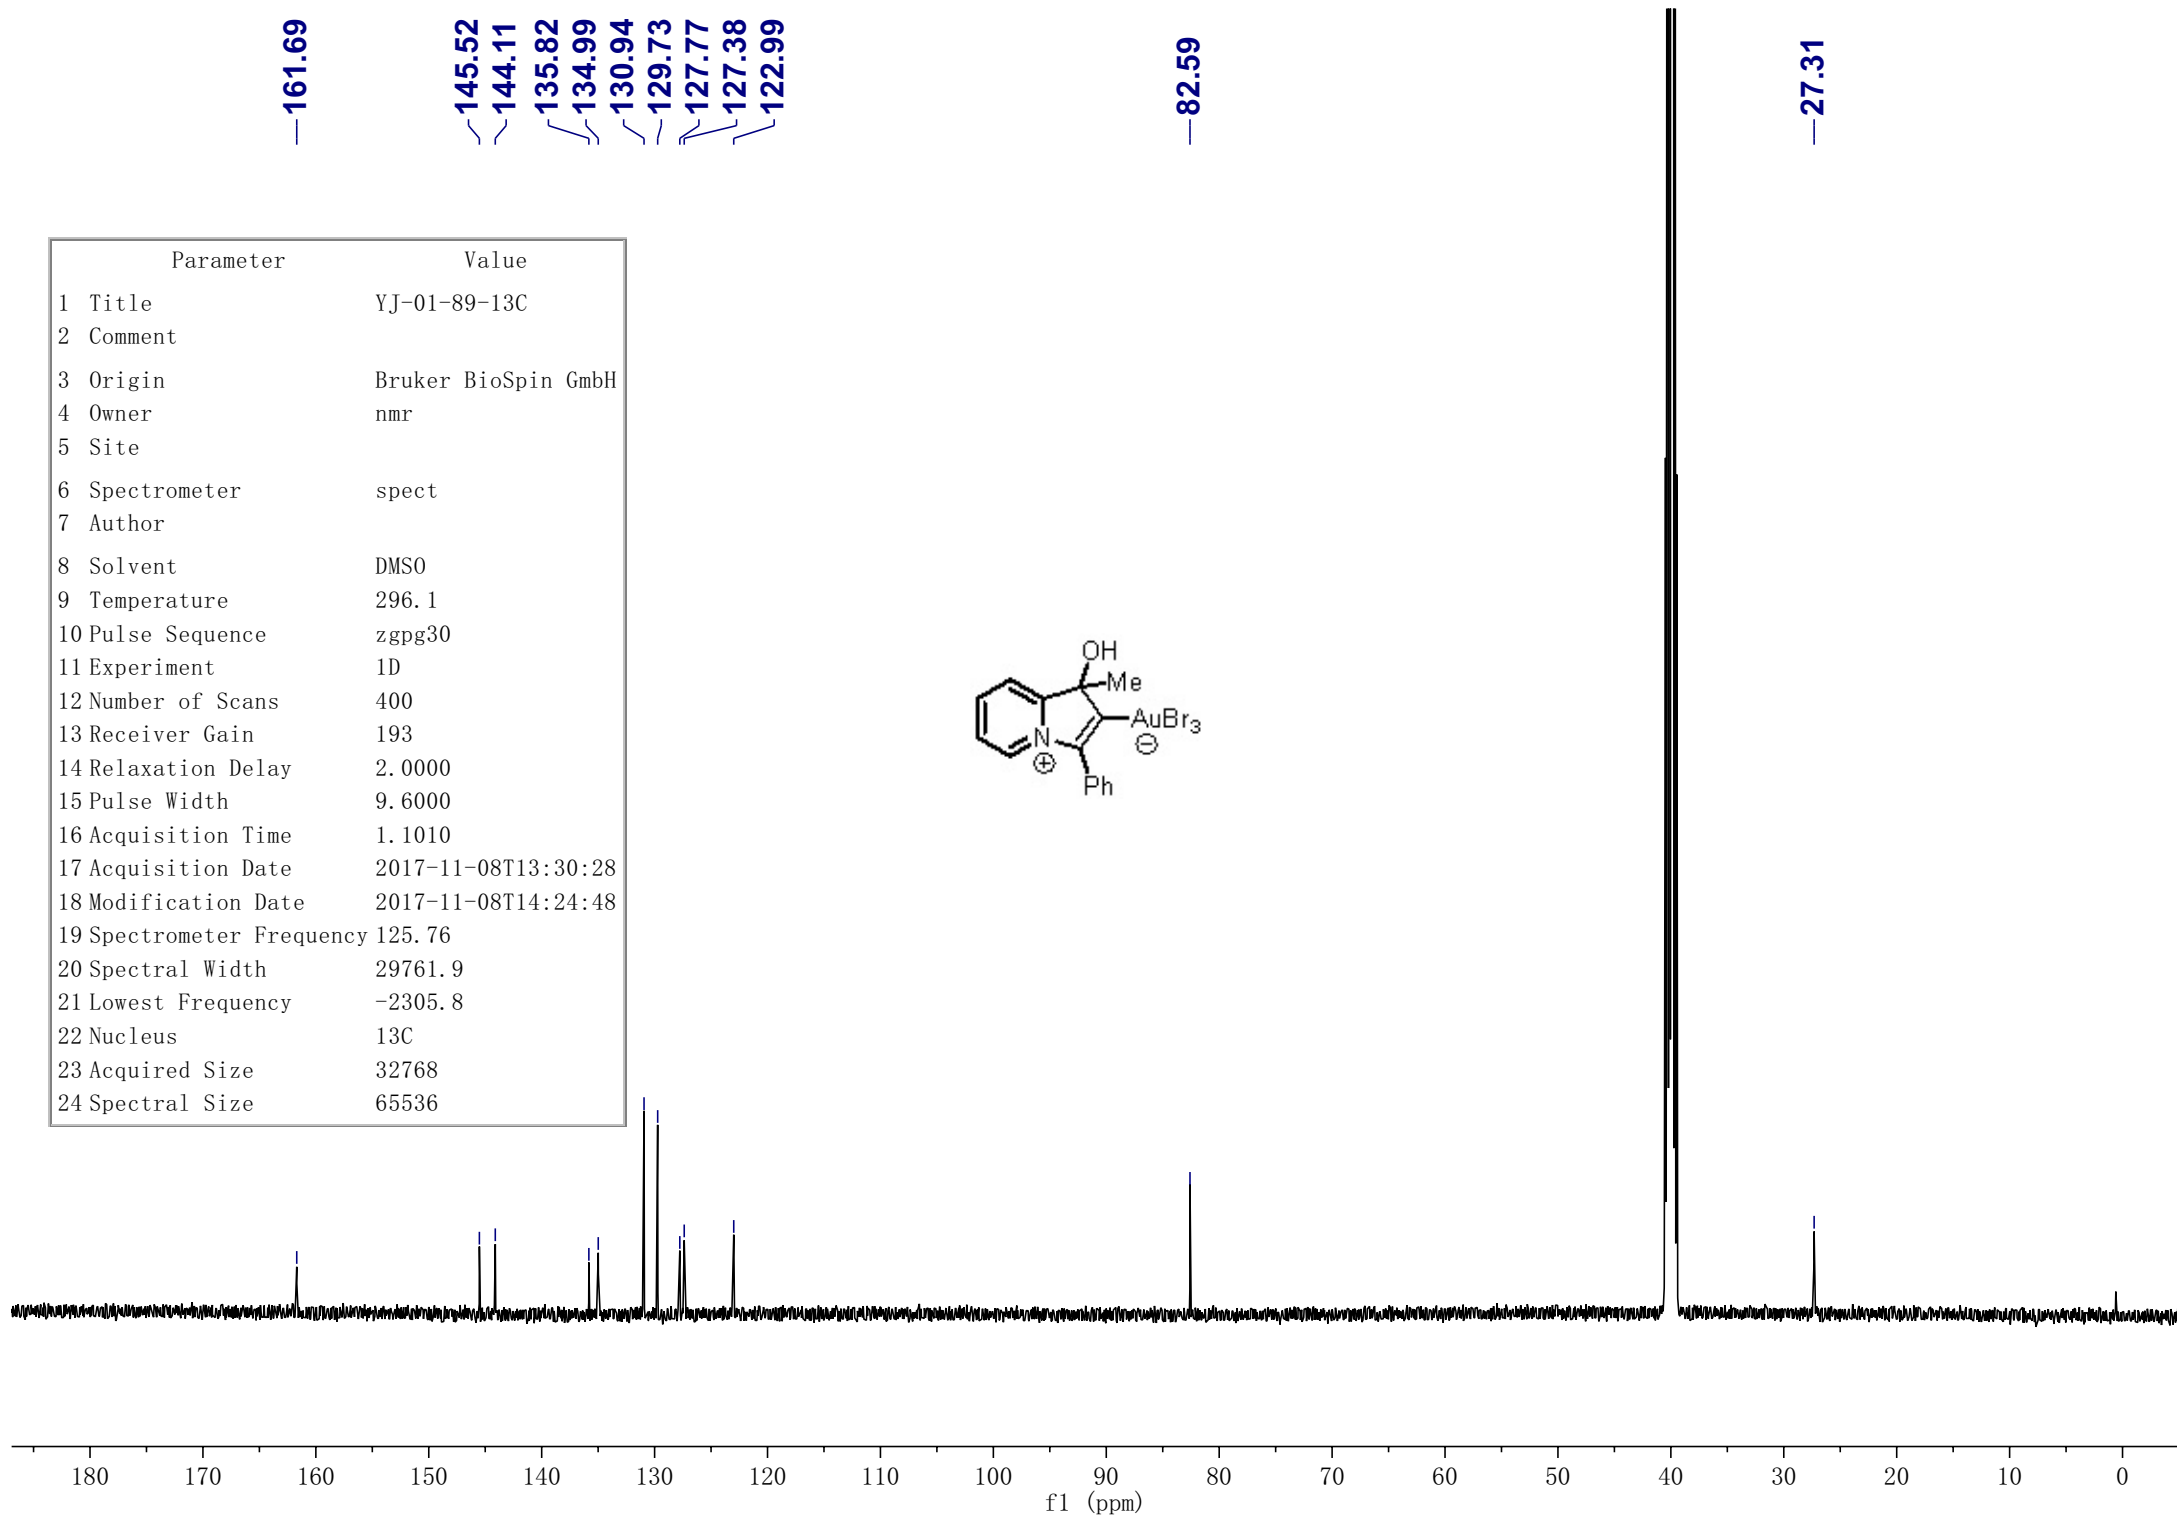

| Parameter                 | Value               |
|---------------------------|---------------------|
| 1 Title                   | YJ-01-40-1          |
| 2 Comment                 | YJ-01-40-1          |
| 3 Origin                  | Bruker BioSpin GmbH |
| 4 Owner                   | nmr                 |
| 5 Site                    |                     |
| 6 Spectrometer            | spect               |
| 7 Author                  |                     |
| 8 Solvent                 | DMSO                |
| 9 Temperature             | 295.0               |
| 10 Pulse Sequence         | zg30                |
| 11 Experiment             | 1D                  |
| 12 Number of Scans        | 16                  |
| 13 Receiver Gain          | 155                 |
| 14 Relaxation Delay       | 1.0000              |
| 15 Pulse Width            | 9.6000              |
| 16 Acquisition Time       | 1.9999              |
| 17 Acquisition Date       | 2016-11-08T13:08:31 |
| 18 Modification Date      | 2017-07-25T19:59:27 |
| 19 Spectrometer Frequency | 400.13              |
| 20 Spectral Width         | 8012.8              |
| 21 Lowest Frequency       | -1535.4             |
| 22 Nucleus                | <sup>1</sup> H      |
| 23 Acquired Size          | 16025               |
| 24 Spectral Size          | 32768               |

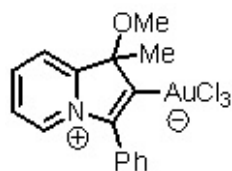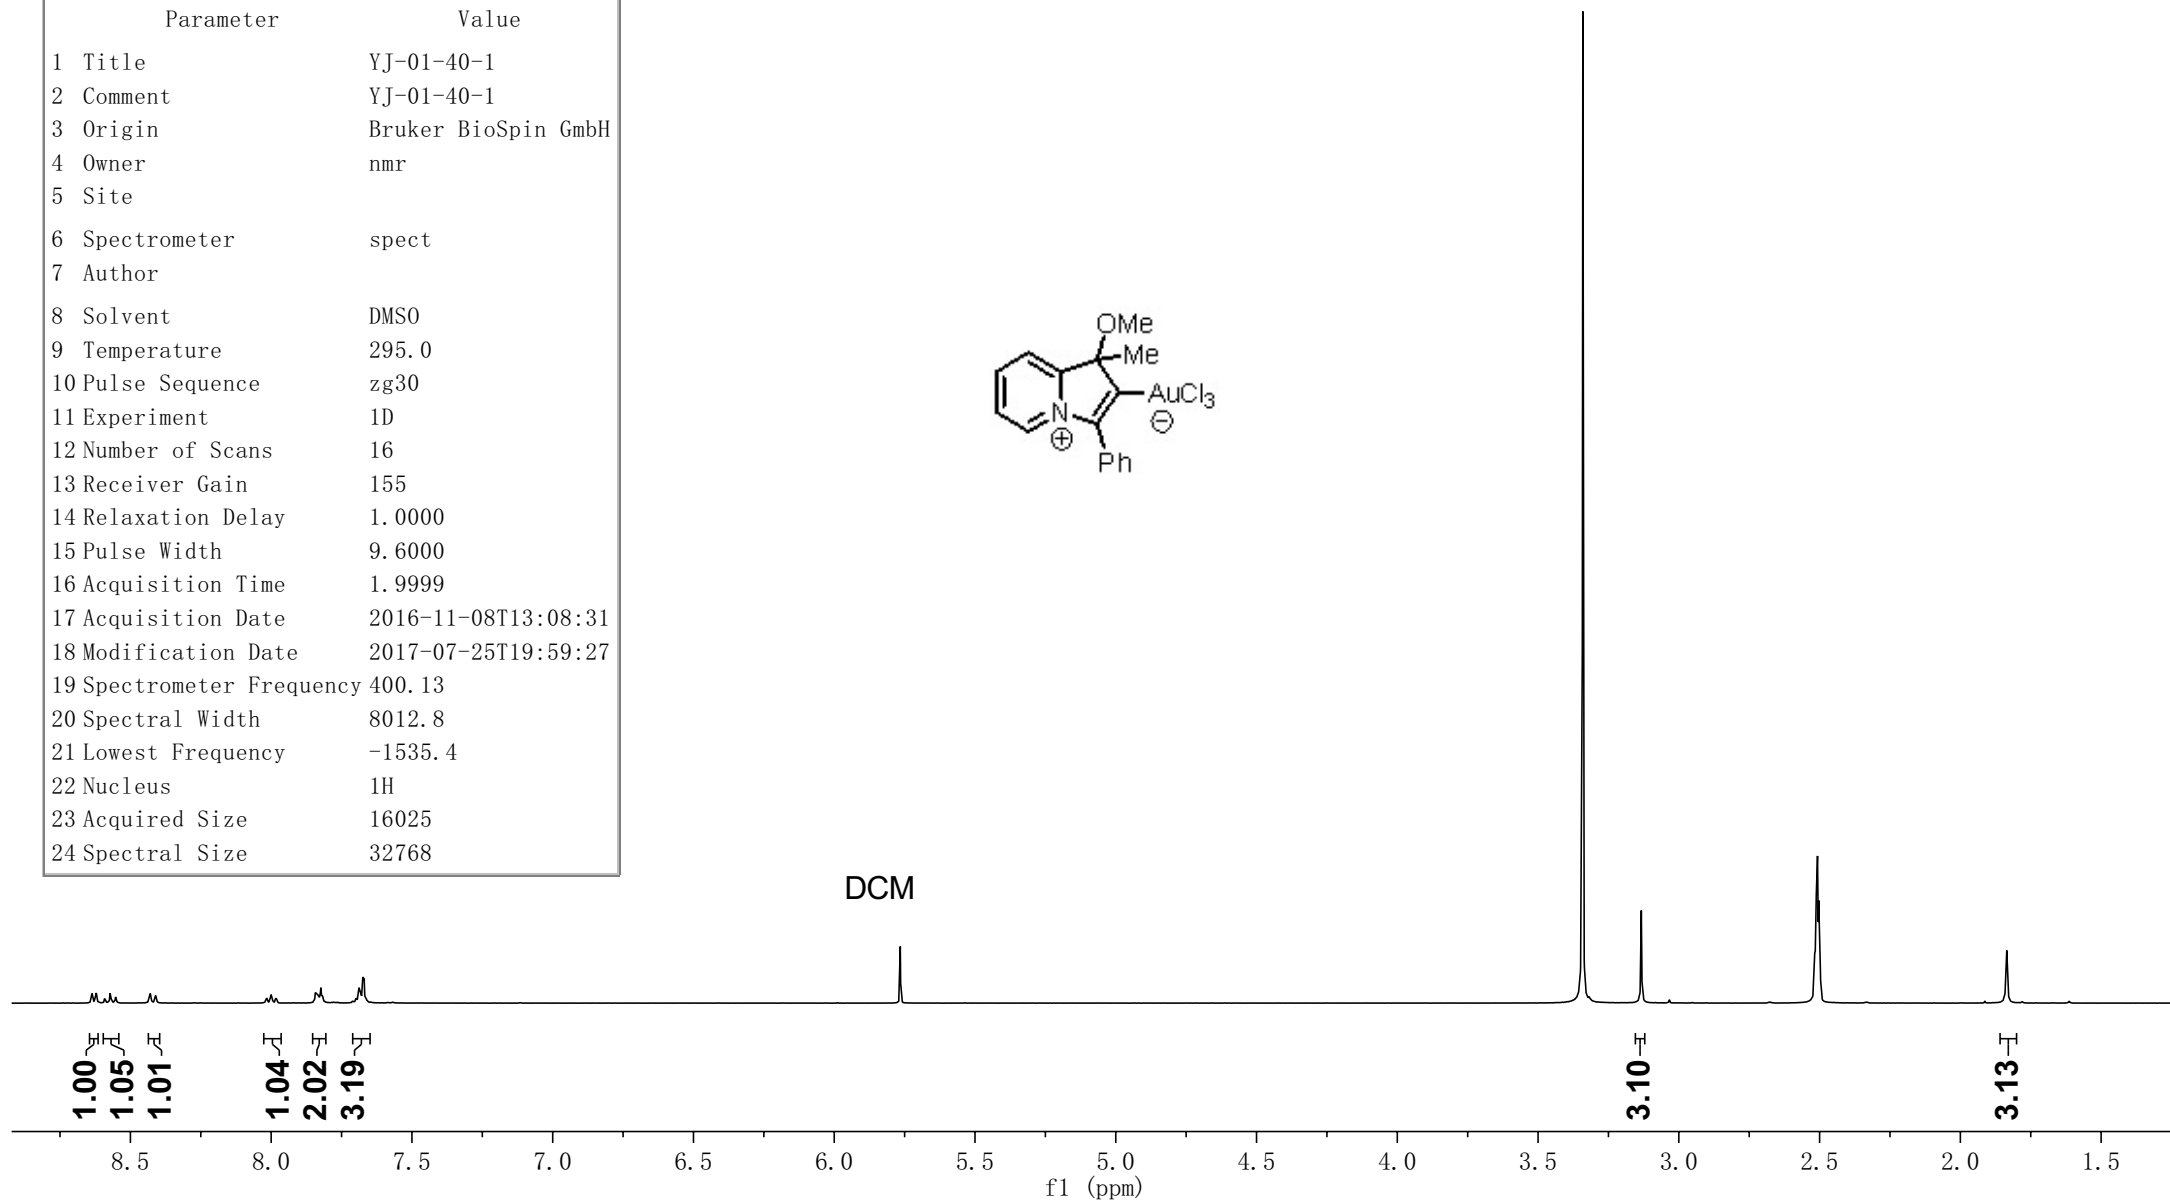

—157.38

—144.54

—141.94

—139.45

—136.88

—131.24

—131.09

—129.77

—128.14

—127.43

—123.46

—88.87

—54.66

—25.63

| Parameter                 | Value               |
|---------------------------|---------------------|
| 1 Title                   | YJ-01-40-C          |
| 2 Comment                 | YJ-01-40-C          |
| 3 Origin                  | Bruker BioSpin GmbH |
| 4 Owner                   | nmr                 |
| 5 Site                    |                     |
| 6 Spectrometer            | spect               |
| 7 Author                  |                     |
| 8 Solvent                 | DMSO                |
| 9 Temperature             | 296.2               |
| 10 Pulse Sequence         | zgpg30              |
| 11 Experiment             | 1D                  |
| 12 Number of Scans        | 569                 |
| 13 Receiver Gain          | 193                 |
| 14 Relaxation Delay       | 2.0000              |
| 15 Pulse Width            | 9.6000              |
| 16 Acquisition Time       | 1.1010              |
| 17 Acquisition Date       | 2016-11-08T13:26:29 |
| 18 Modification Date      | 2016-11-29T20:44:30 |
| 19 Spectrometer Frequency | 125.76              |
| 20 Spectral Width         | 29761.9             |
| 21 Lowest Frequency       | -2305.8             |
| 22 Nucleus                | <sup>13</sup> C     |
| 23 Acquired Size          | 32768               |
| 24 Spectral Size          | 65536               |

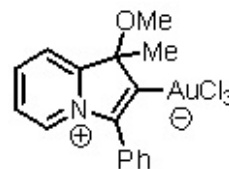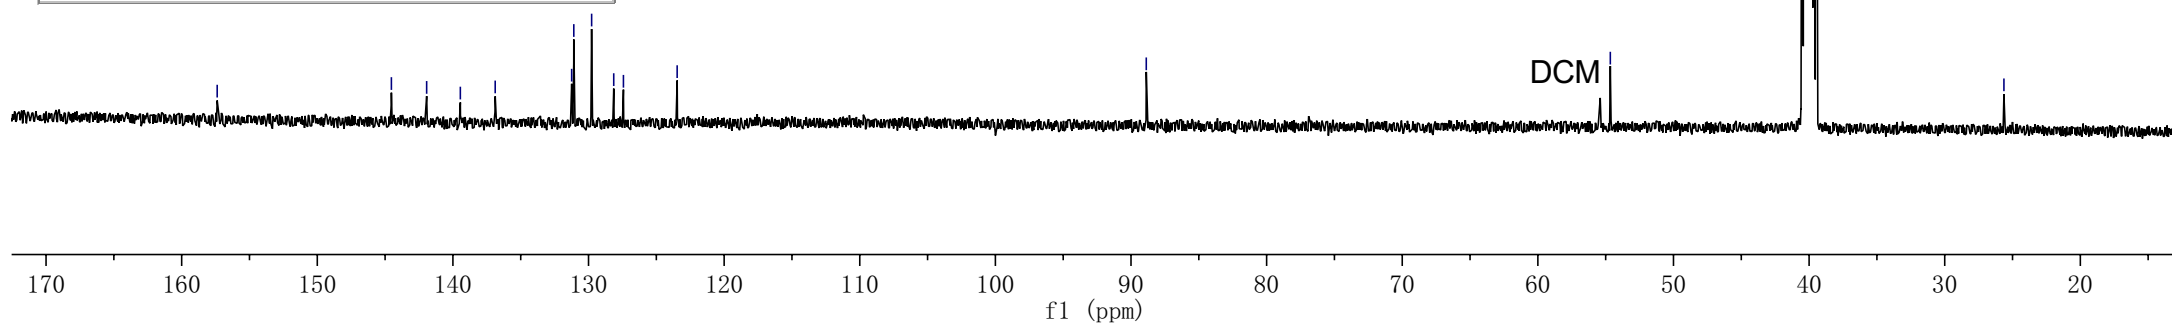

| Parameter                 | Value               |
|---------------------------|---------------------|
| 1 Title                   | YJ-01-82-DMSO       |
| 2 Comment                 |                     |
| 3 Origin                  | Bruker BioSpin GmbH |
| 4 Owner                   | nmr                 |
| 5 Site                    |                     |
| 6 Spectrometer            | spect               |
| 7 Author                  |                     |
| 8 Solvent                 | DMSO                |
| 9 Temperature             | 296.2               |
| 10 Pulse Sequence         | zg30                |
| 11 Experiment             | 1D                  |
| 12 Number of Scans        | 16                  |
| 13 Receiver Gain          | 95                  |
| 14 Relaxation Delay       | 1.0000              |
| 15 Pulse Width            | 10.7100             |
| 16 Acquisition Time       | 3.2768              |
| 17 Acquisition Date       | 2018-02-27T09:55:50 |
| 18 Modification Date      | 2018-02-27T10:30:04 |
| 19 Spectrometer Frequency | 500.13              |
| 20 Spectral Width         | 10000.0             |
| 21 Lowest Frequency       | -1911.5             |
| 22 Nucleus                | <sup>1</sup> H      |
| 23 Acquired Size          | 32768               |
| 24 Spectral Size          | 65536               |

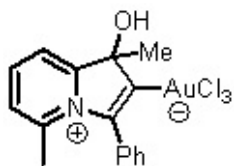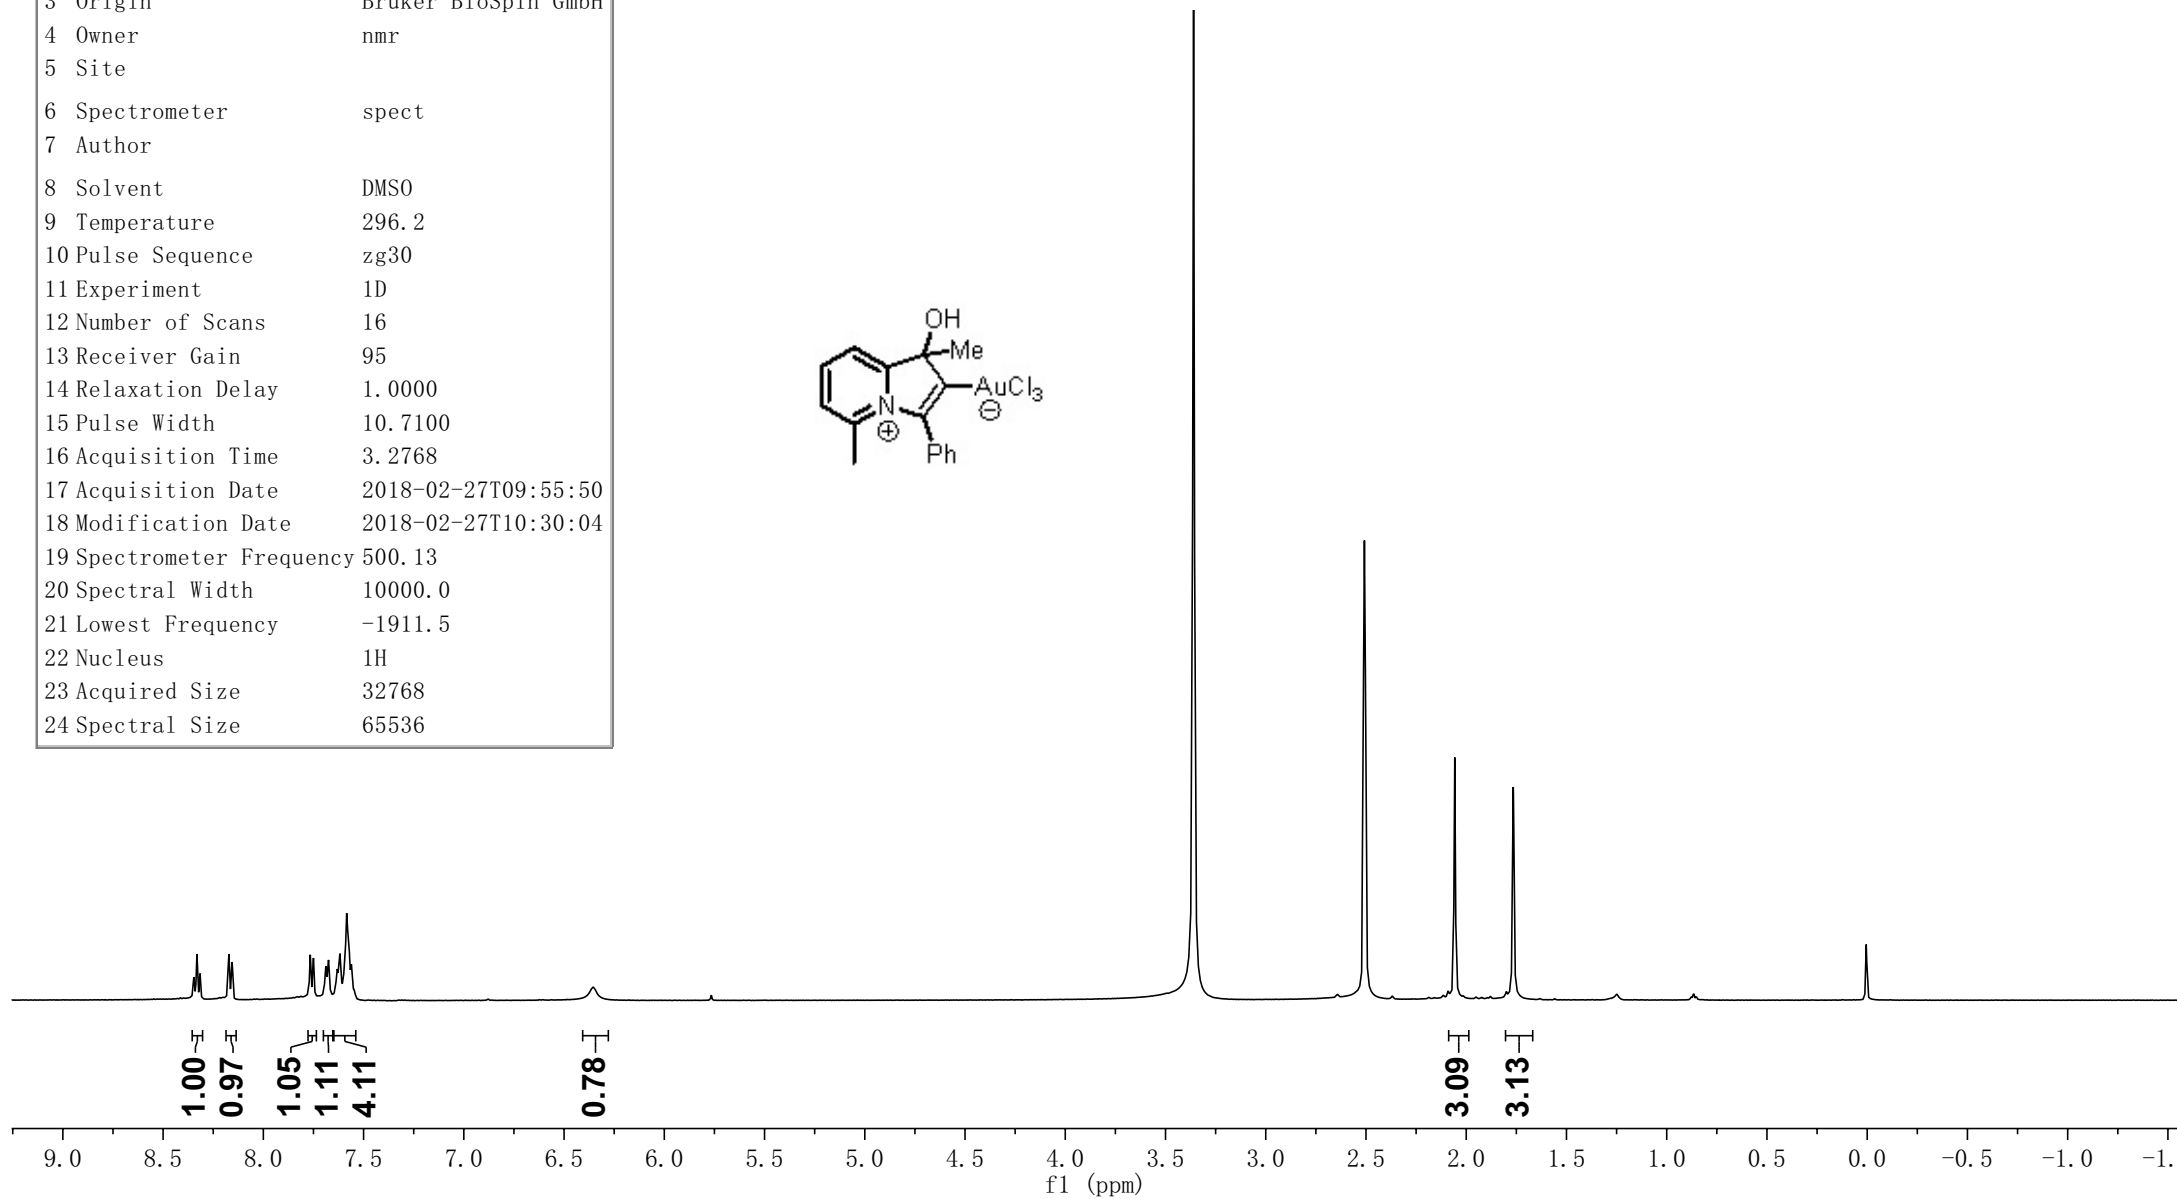

—163.25  
—150.22  
—147.13  
—143.47  
—137.39  
—132.24  
—131.96  
—131.77  
—130.75  
—130.51  
—129.15  
—129.00  
—120.78

—81.71

—26.81

—21.95

| Parameter                 | Value               |
|---------------------------|---------------------|
| 1 Title                   | YJ-01-82-C          |
| 2 Comment                 |                     |
| 3 Origin                  | Bruker BioSpin GmbH |
| 4 Owner                   | nmr                 |
| 5 Site                    |                     |
| 6 Spectrometer            | spect               |
| 7 Author                  |                     |
| 8 Solvent                 | DMSO                |
| 9 Temperature             | 296.2               |
| 10 Pulse Sequence         | zgpg30              |
| 11 Experiment             | 1D                  |
| 12 Number of Scans        | 319                 |
| 13 Receiver Gain          | 193                 |
| 14 Relaxation Delay       | 2.0000              |
| 15 Pulse Width            | 9.6000              |
| 16 Acquisition Time       | 1.1010              |
| 17 Acquisition Date       | 2017-09-26T17:41:20 |
| 18 Modification Date      | 2017-09-26T19:32:22 |
| 19 Spectrometer Frequency | 125.76              |
| 20 Spectral Width         | 29761.9             |
| 21 Lowest Frequency       | -2305.8             |
| 22 Nucleus                | <sup>13</sup> C     |
| 23 Acquired Size          | 32768               |
| 24 Spectral Size          | 65536               |

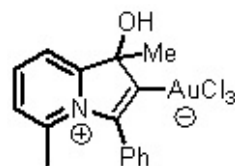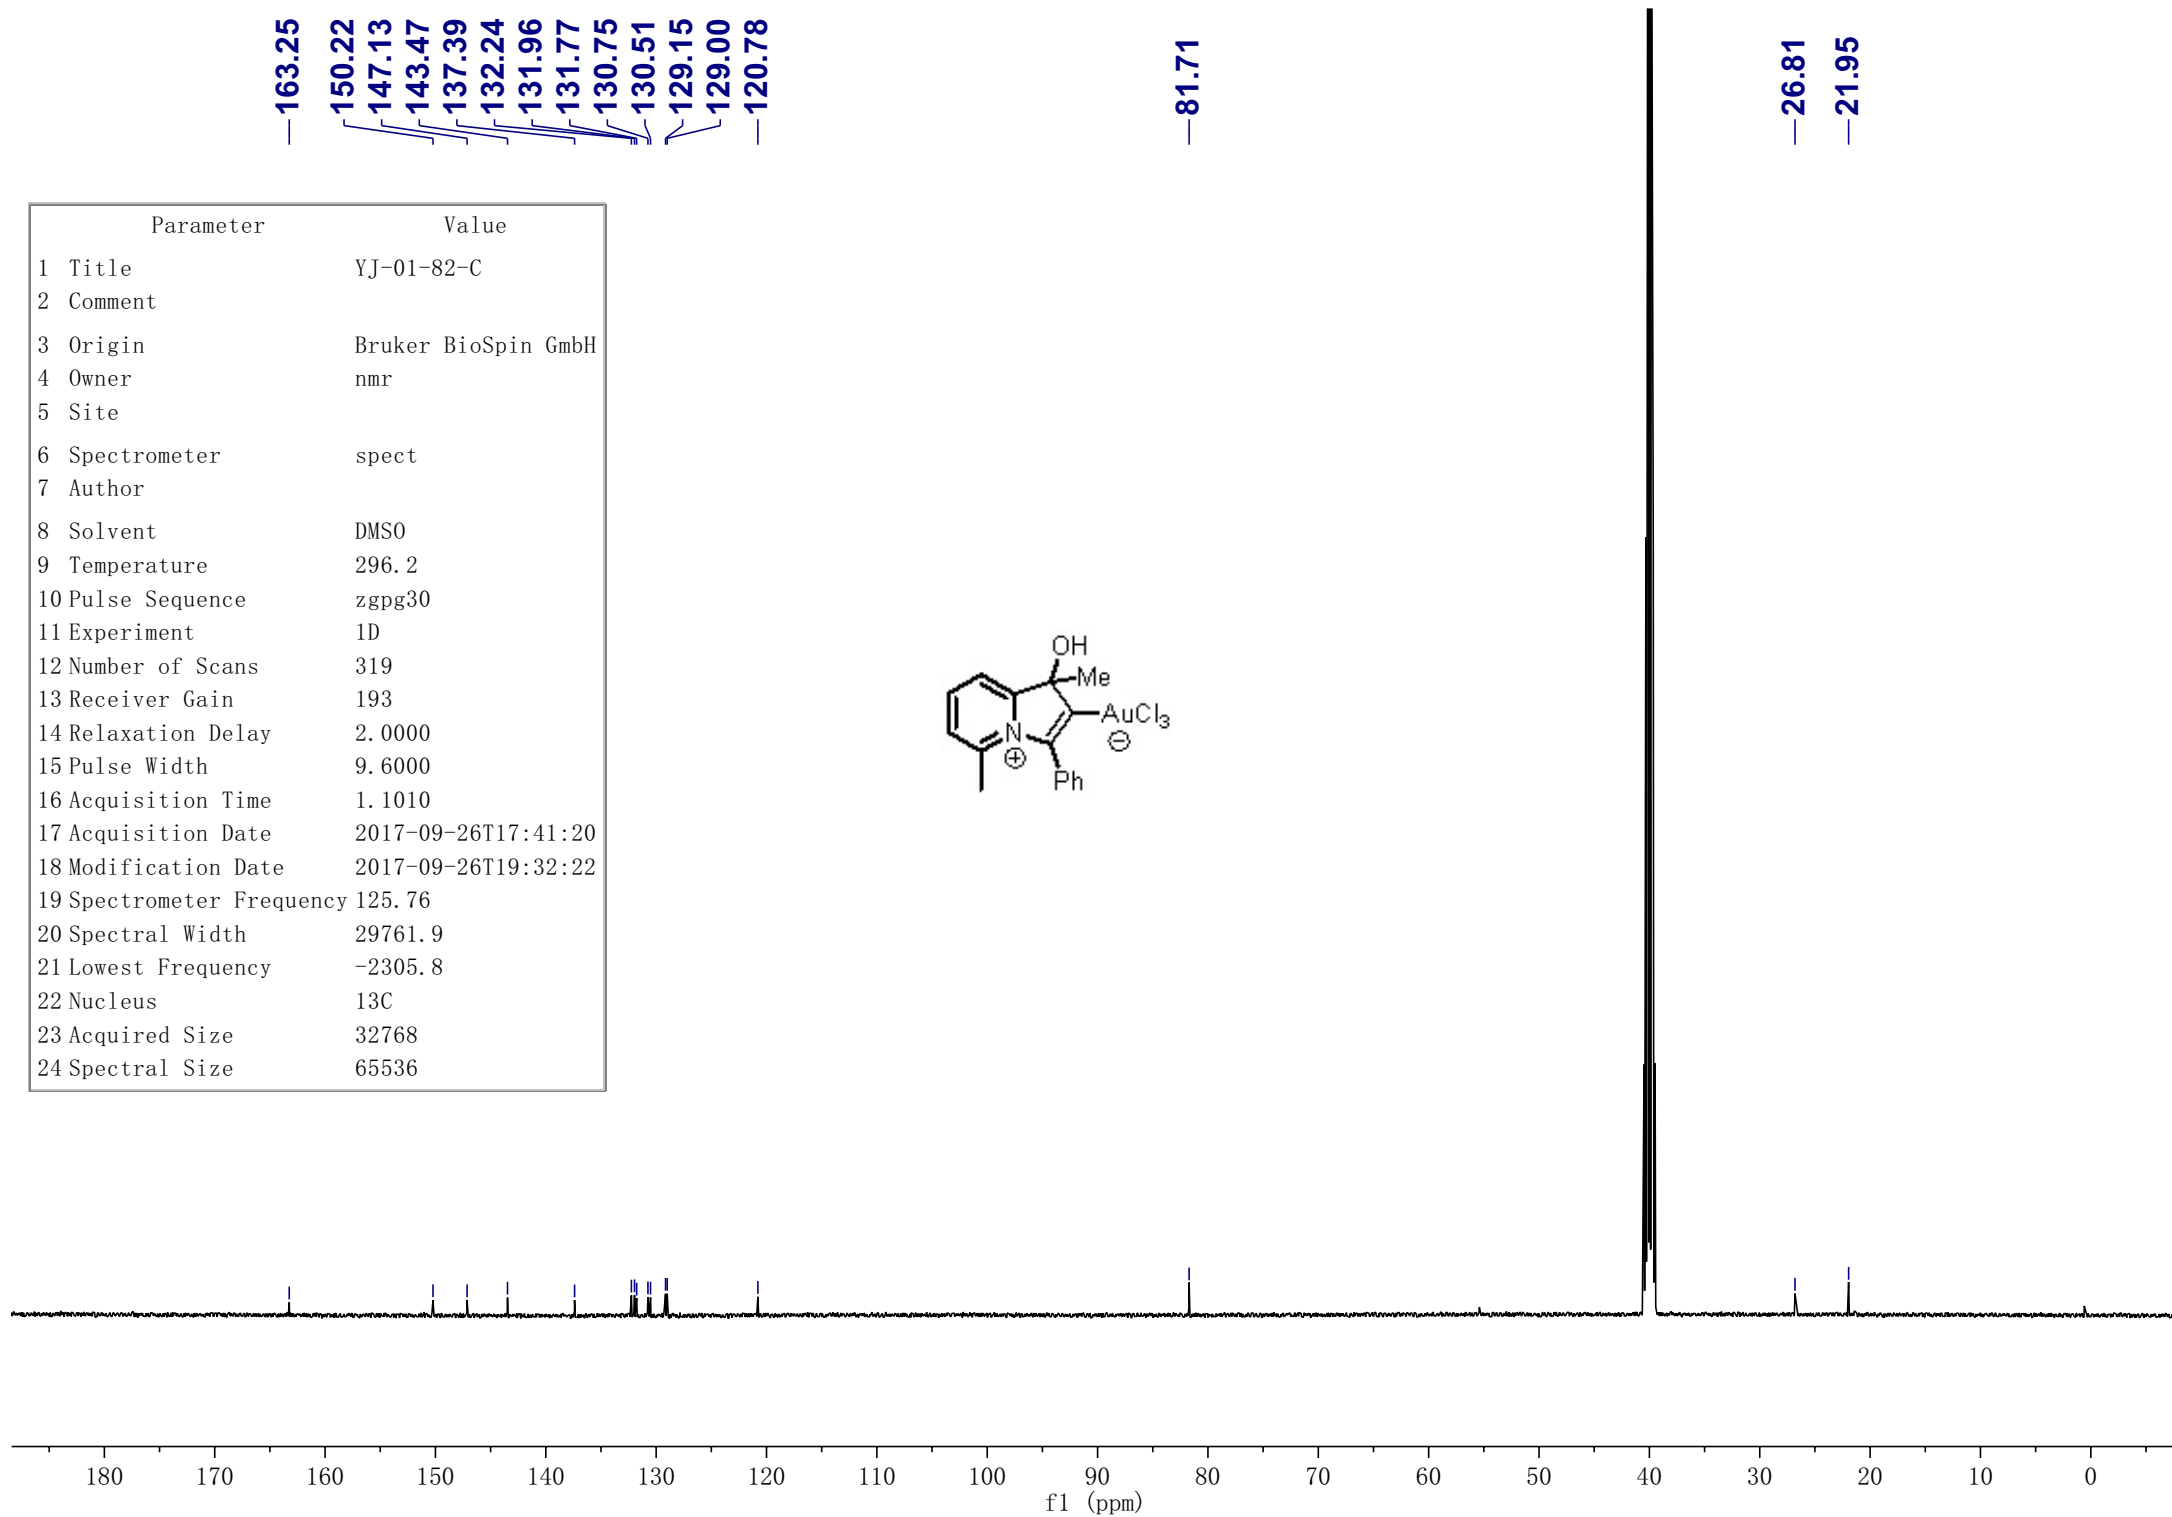

|    | Parameter              | Value               |
|----|------------------------|---------------------|
| 1  | Title                  | YJ-01-25-DMSO       |
| 2  | Comment                | YJ-01-25-DMSO       |
| 3  | Origin                 | Bruker BioSpin GmbH |
| 4  | Owner                  | nmr                 |
| 5  | Site                   |                     |
| 6  | Spectrometer           | spect               |
| 7  | Author                 |                     |
| 8  | Solvent                | DMSO                |
| 9  | Temperature            | 296.7               |
| 10 | Pulse Sequence         | zg30                |
| 11 | Experiment             | 1D                  |
| 12 | Number of Scans        | 32                  |
| 13 | Receiver Gain          | 98                  |
| 14 | Relaxation Delay       | 1.0000              |
| 15 | Pulse Width            | 9.6000              |
| 16 | Acquisition Time       | 1.9999              |
| 17 | Acquisition Date       | 2016-07-24T18:36:38 |
| 18 | Modification Date      | 2017-07-25T20:00:00 |
| 19 | Spectrometer Frequency | 400.13              |
| 20 | Spectral Width         | 8012.8              |
| 21 | Lowest Frequency       | -1535.4             |
| 22 | Nucleus                | 1H                  |
| 23 | Acquired Size          | 16025               |
| 24 | Spectral Size          | 32768               |

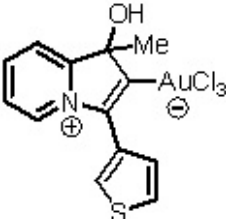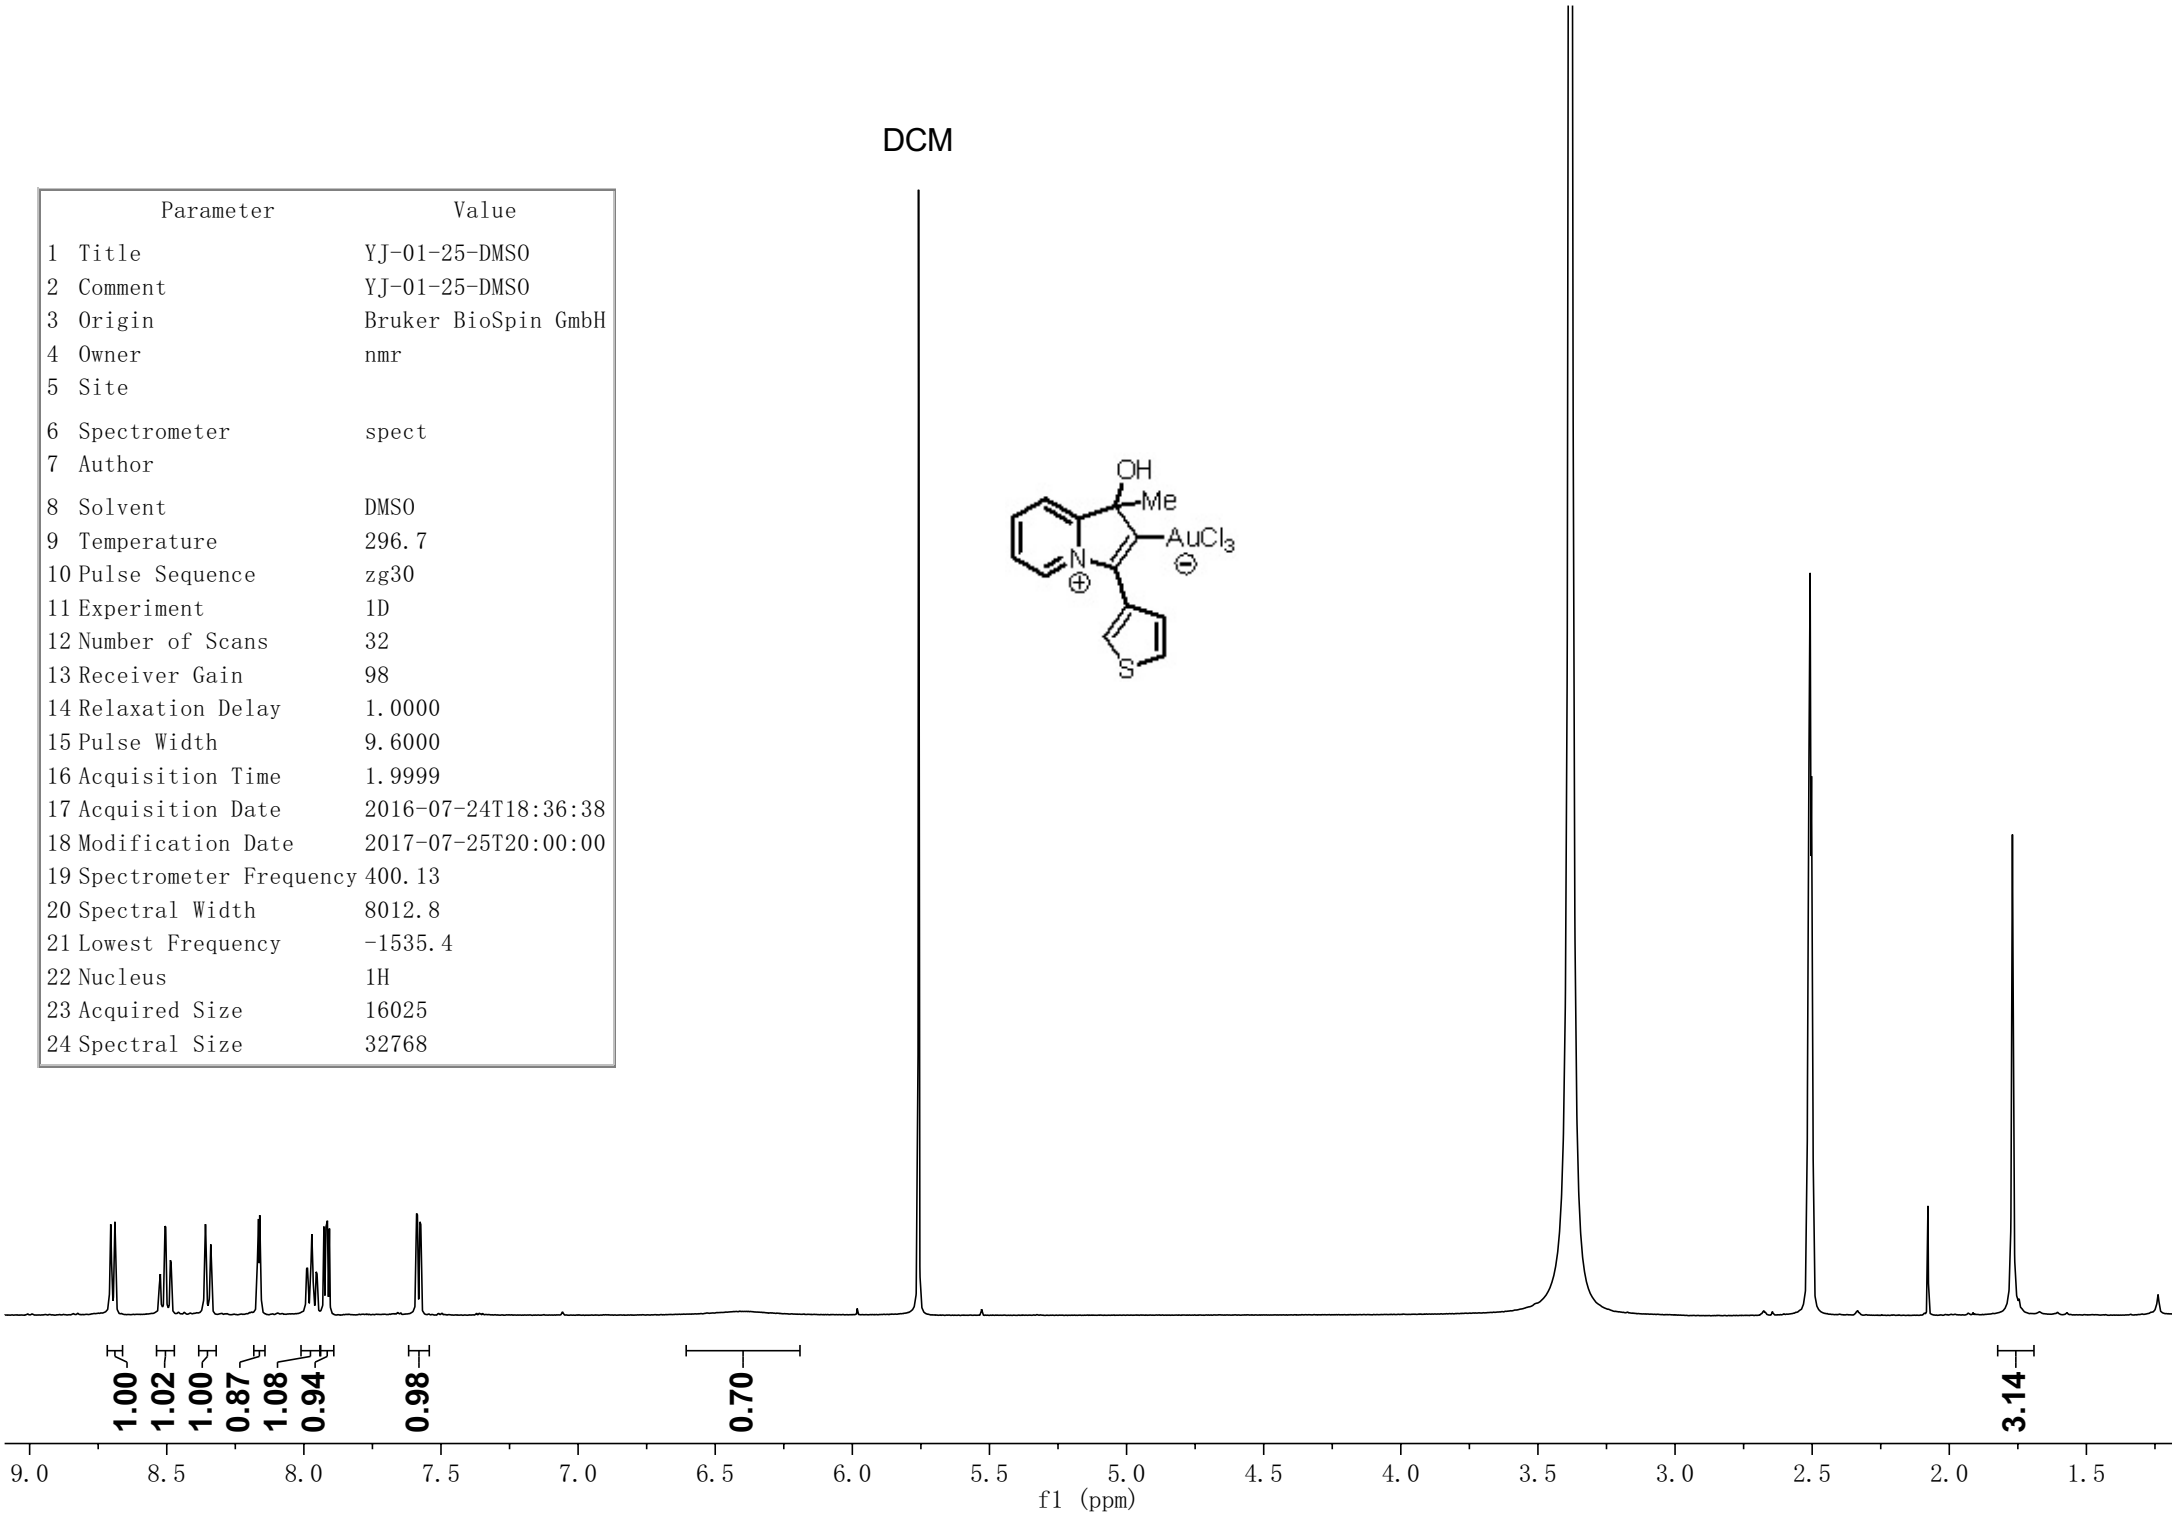

|    | Parameter              | Value               |
|----|------------------------|---------------------|
| 1  | Title                  | YJ-01-25-DMSO       |
| 2  | Comment                | YJ-01-25-DMSO       |
| 3  | Origin                 | Bruker BioSpin GmbH |
| 4  | Owner                  | nmr                 |
| 5  | Site                   |                     |
| 6  | Spectrometer           | spect               |
| 7  | Author                 |                     |
| 8  | Solvent                | DMSO                |
| 9  | Temperature            | 296.7               |
| 10 | Pulse Sequence         | zgpg30              |
| 11 | Experiment             | 1D                  |
| 12 | Number of Scans        | 1086                |
| 13 | Receiver Gain          | 196                 |
| 14 | Relaxation Delay       | 2.0000              |
| 15 | Pulse Width            | 10.0000             |
| 16 | Acquisition Time       | 1.3631              |
| 17 | Acquisition Date       | 2016-07-24T18:41:01 |
| 18 | Modification Date      | 2017-07-25T20:00:01 |
| 19 | Spectrometer Frequency | 100.61              |
| 20 | Spectral Width         | 24038.5             |
| 21 | Lowest Frequency       | -1958.0             |
| 22 | Nucleus                | <sup>13</sup> C     |
| 23 | Acquired Size          | 32768               |
| 24 | Spectral Size          | 65536               |

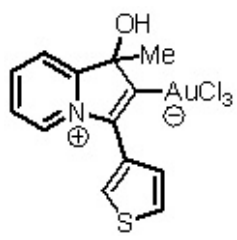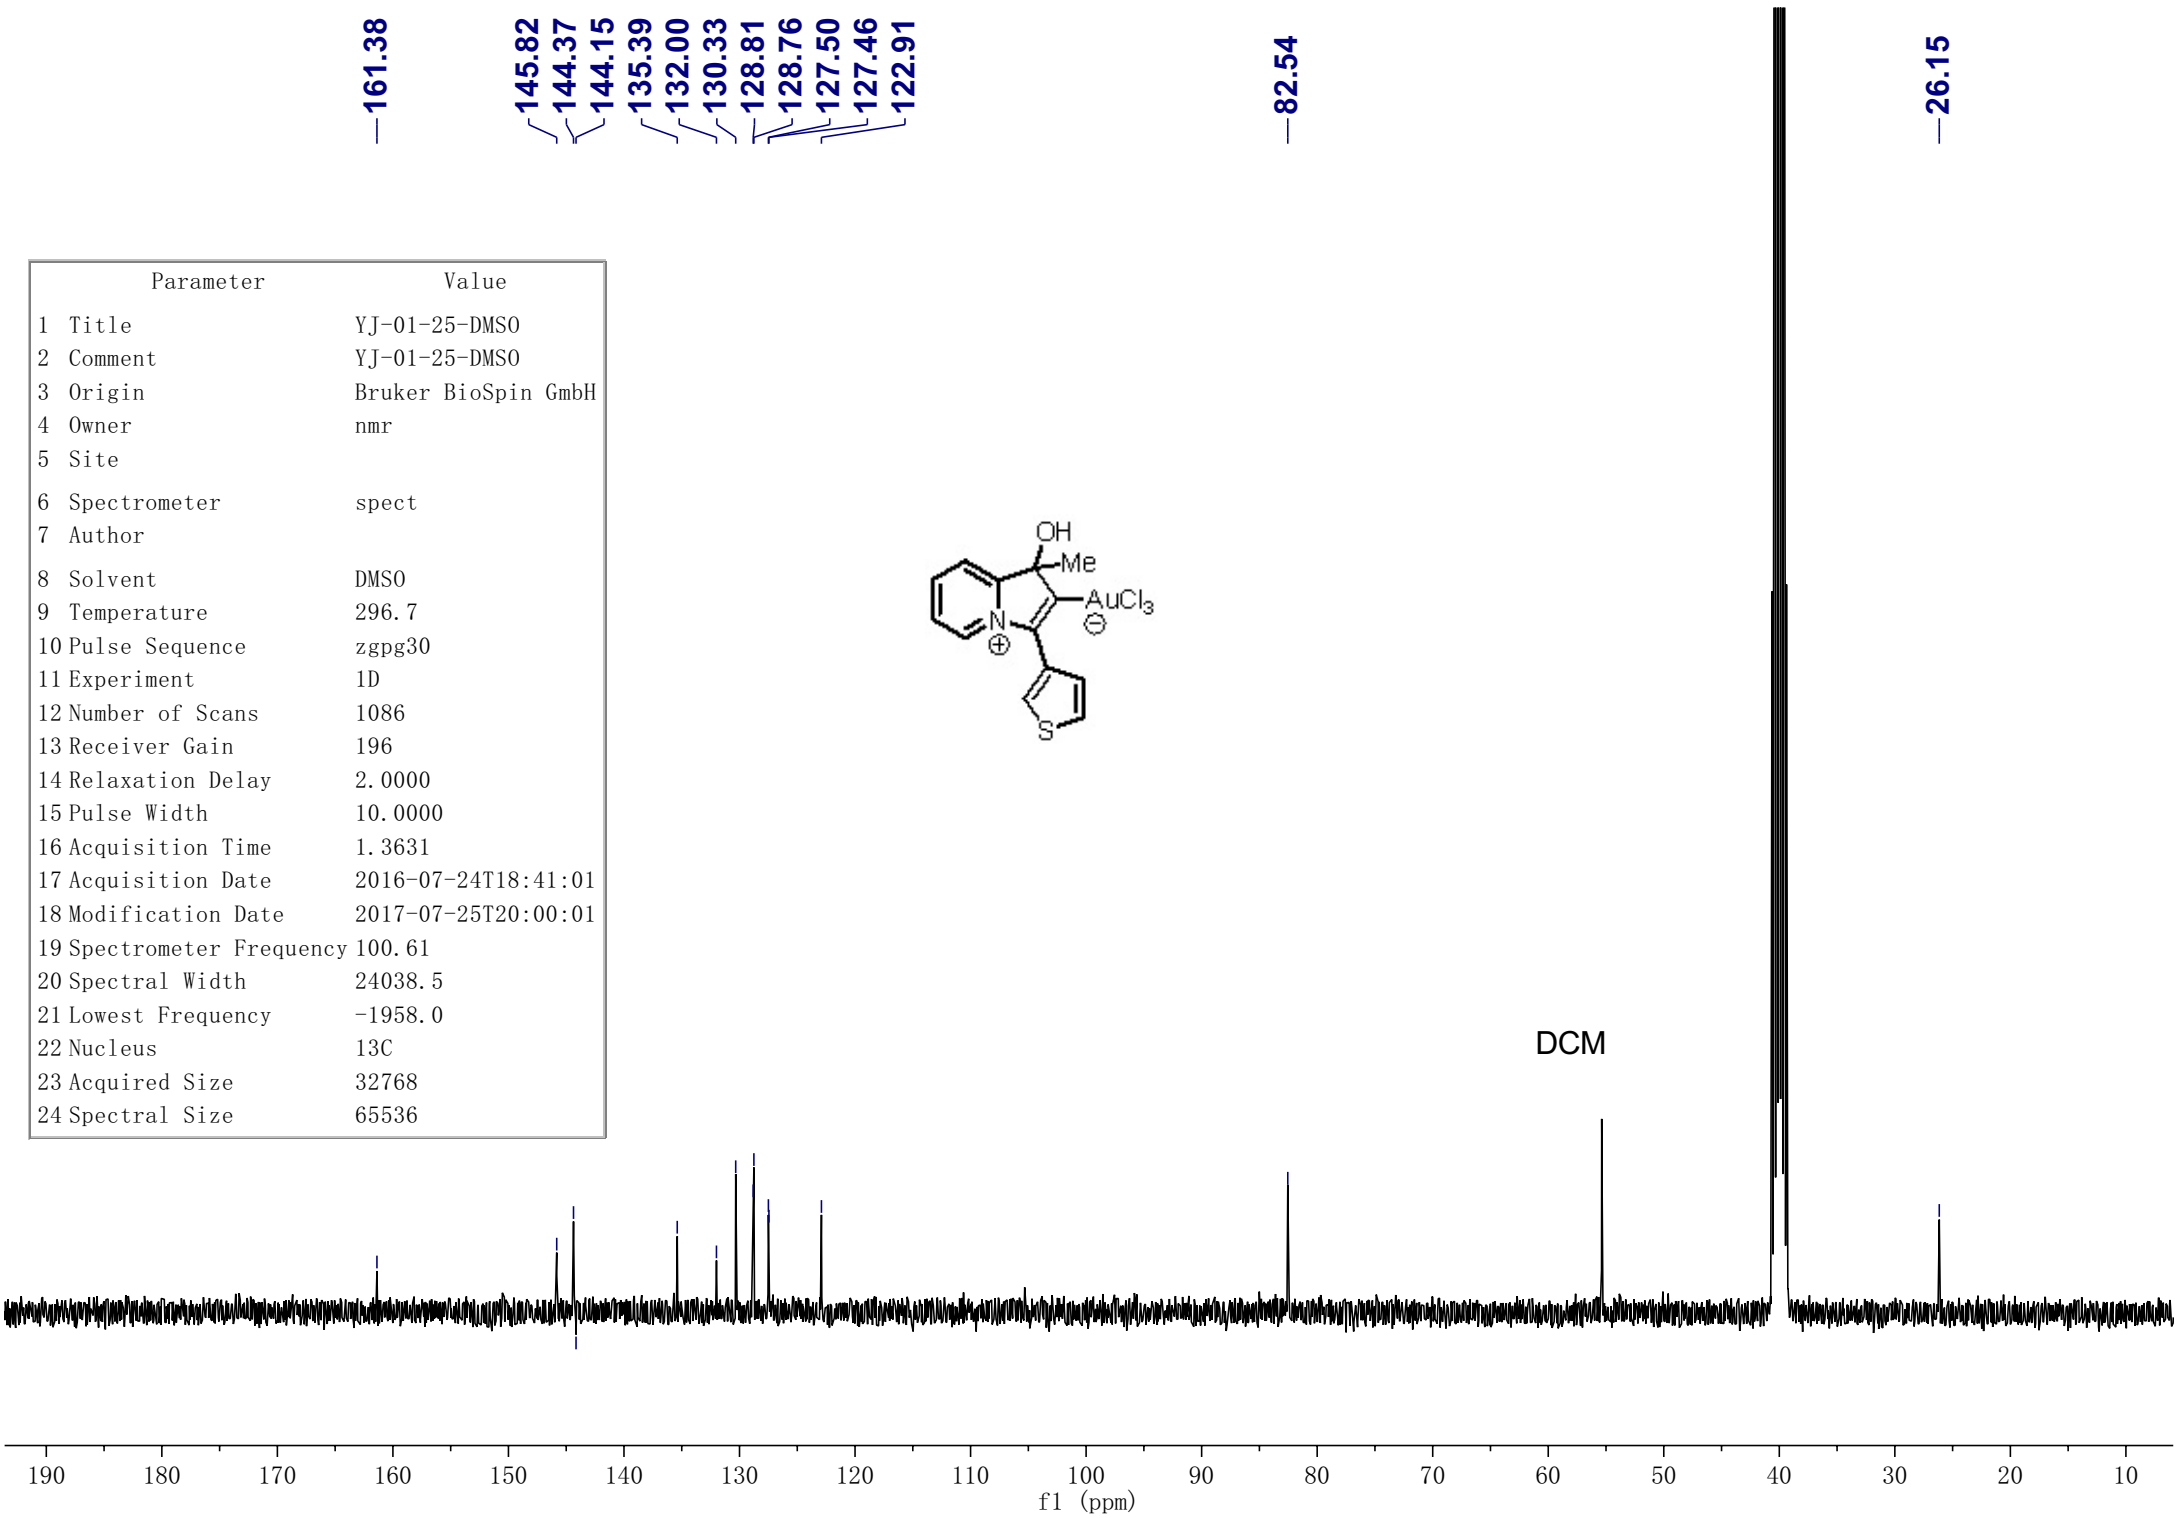

| Parameter                 | Value               |
|---------------------------|---------------------|
| 1 Title                   | YJ-01-127-2         |
| 2 Comment                 | YJ-01-127-2         |
| 3 Origin                  | Bruker BioSpin GmbH |
| 4 Owner                   | nmr                 |
| 5 Site                    |                     |
| 6 Spectrometer            | spect               |
| 7 Author                  |                     |
| 8 Solvent                 | DMSO                |
| 9 Temperature             | 299.1               |
| 10 Pulse Sequence         | zg30                |
| 11 Experiment             | 1D                  |
| 12 Number of Scans        | 84                  |
| 13 Receiver Gain          | 174                 |
| 14 Relaxation Delay       | 1.0000              |
| 15 Pulse Width            | 8.7300              |
| 16 Acquisition Time       | 1.9999              |
| 17 Acquisition Date       | 2018-05-07T18:30:11 |
| 18 Modification Date      | 2018-05-07T18:48:41 |
| 19 Spectrometer Frequency | 400.13              |
| 20 Spectral Width         | 8012.8              |
| 21 Lowest Frequency       | -1535.4             |
| 22 Nucleus                | <sup>1</sup> H      |
| 23 Acquired Size          | 16025               |
| 24 Spectral Size          | 32768               |

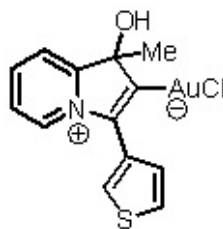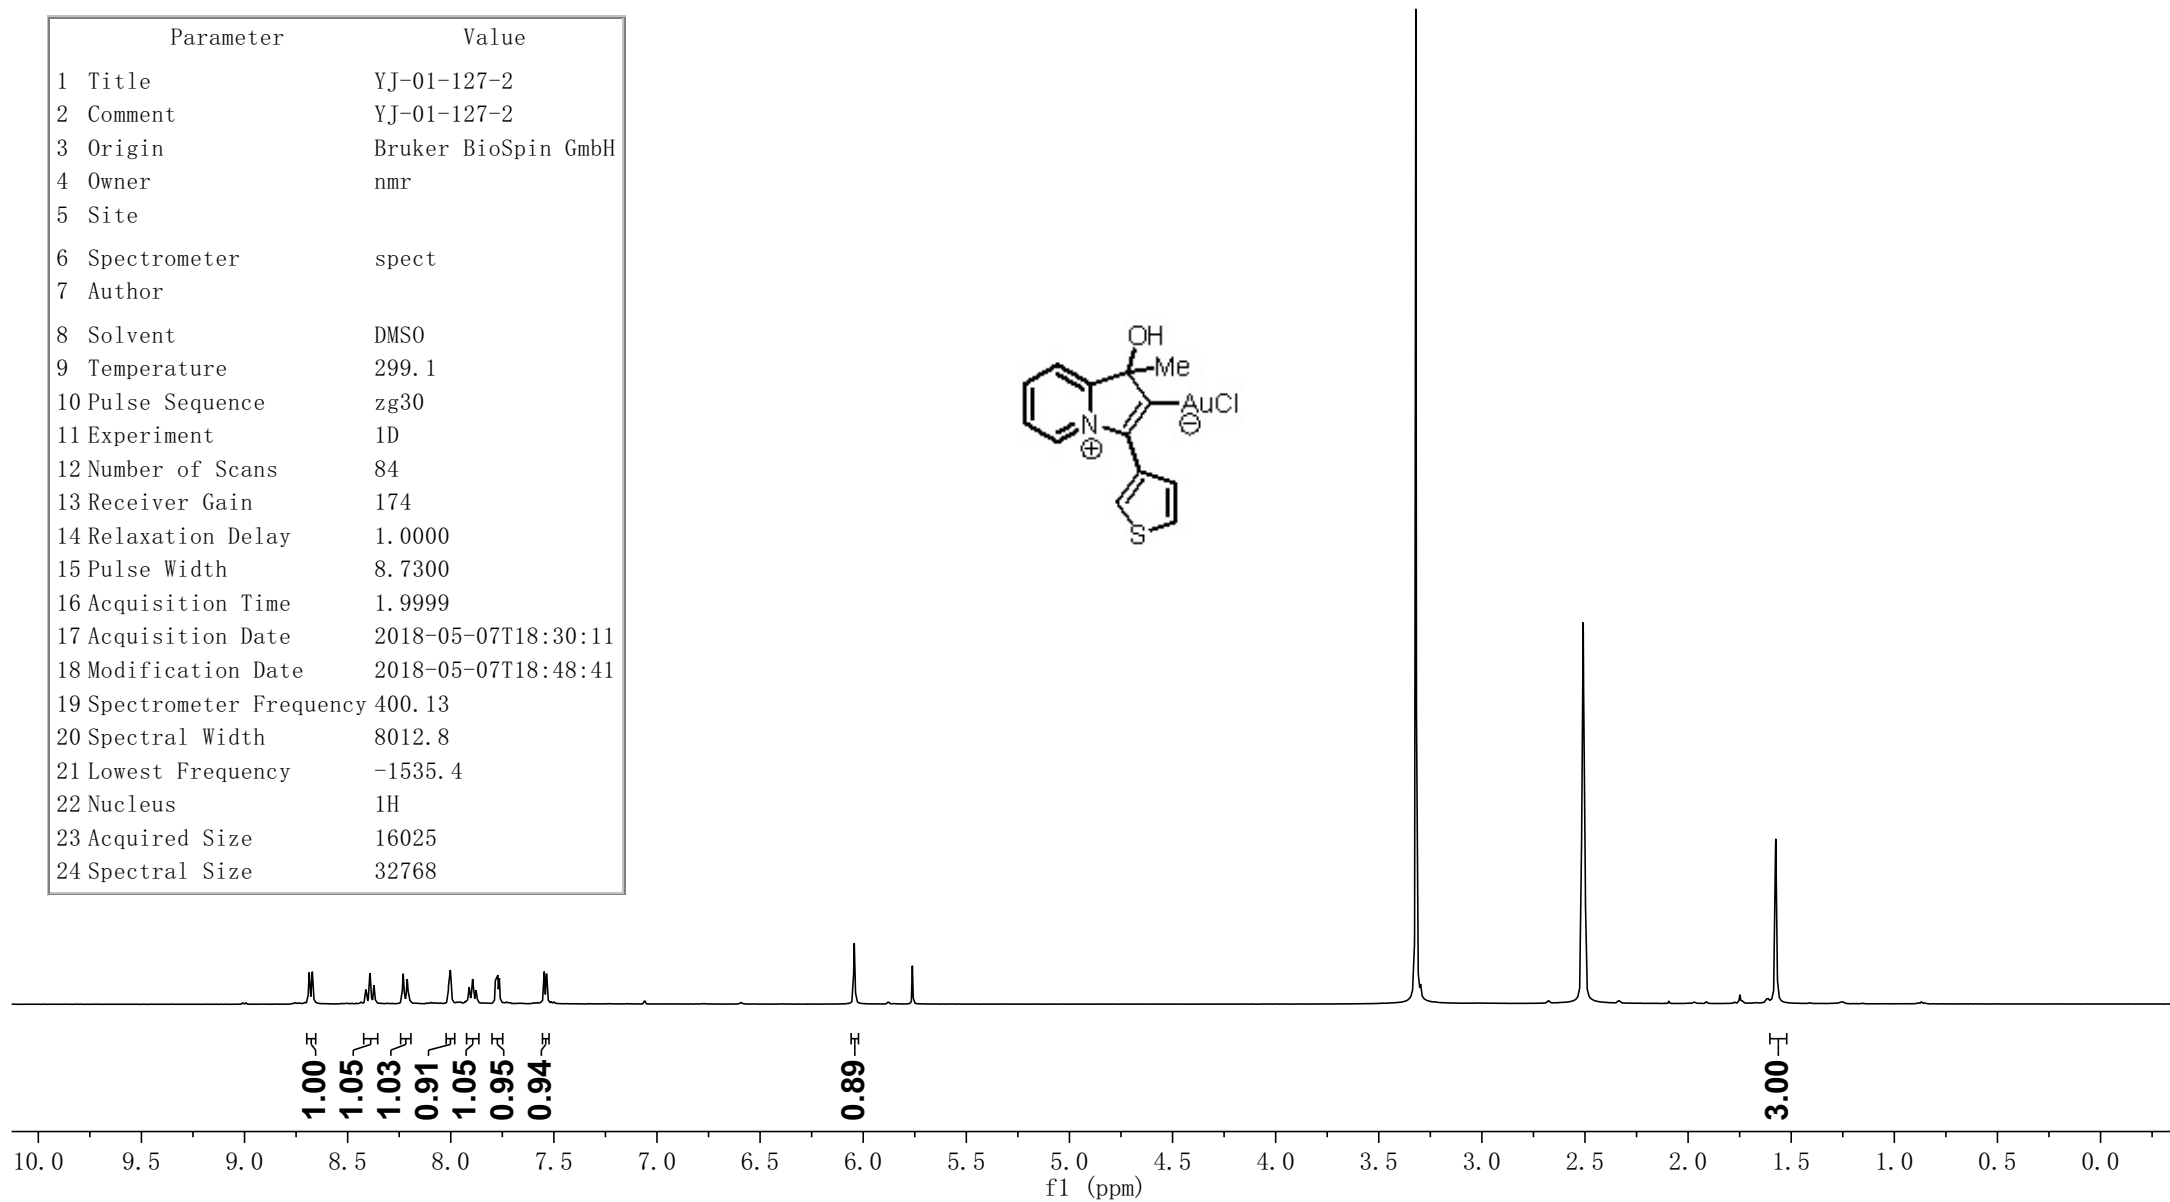

—168.71

—163.20

—142.17

—135.79

—133.70

—131.28

—129.29

—127.41

—127.15

—122.43

—85.00

—26.56

| Parameter                 | Value               |
|---------------------------|---------------------|
| 1 Title                   | YJ-01-122-F1        |
| 2 Comment                 |                     |
| 3 Origin                  | Bruker BioSpin GmbH |
| 4 Owner                   | nmr                 |
| 5 Site                    |                     |
| 6 Spectrometer            | spect               |
| 7 Author                  |                     |
| 8 Solvent                 | DMSO                |
| 9 Temperature             | 296.2               |
| 10 Pulse Sequence         | zgpg30              |
| 11 Experiment             | 1D                  |
| 12 Number of Scans        | 307                 |
| 13 Receiver Gain          | 193                 |
| 14 Relaxation Delay       | 2.0000              |
| 15 Pulse Width            | 9.6000              |
| 16 Acquisition Time       | 1.1010              |
| 17 Acquisition Date       | 2018-04-25T18:26:29 |
| 18 Modification Date      | 2018-04-25T19:17:05 |
| 19 Spectrometer Frequency | 125.76              |
| 20 Spectral Width         | 29761.9             |
| 21 Lowest Frequency       | -2305.8             |
| 22 Nucleus                | <sup>13</sup> C     |
| 23 Acquired Size          | 32768               |
| 24 Spectral Size          | 65536               |

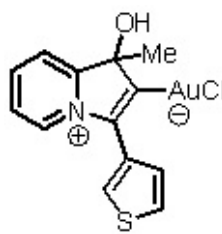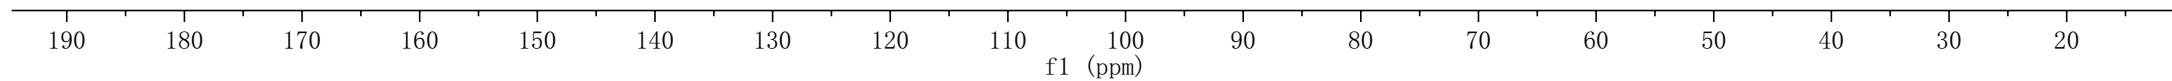

| Parameter                 | Value               |
|---------------------------|---------------------|
| 1 Title                   | zxb-s-1-137-H       |
| 2 Comment                 |                     |
| 3 Origin                  | Bruker BioSpin GmbH |
| 4 Owner                   | nmr                 |
| 5 Site                    |                     |
| 6 Spectrometer            | spect               |
| 7 Author                  |                     |
| 8 Solvent                 | Acetone             |
| 9 Temperature             | 296.1               |
| 10 Pulse Sequence         | zg30                |
| 11 Experiment             | 1D                  |
| 12 Number of Scans        | 16                  |
| 13 Receiver Gain          | 125                 |
| 14 Relaxation Delay       | 1.0000              |
| 15 Pulse Width            | 12.0000             |
| 16 Acquisition Time       | 3.2768              |
| 17 Acquisition Date       | 2016-06-13T17:40:15 |
| 18 Modification Date      | 2016-06-13T19:05:59 |
| 19 Spectrometer Frequency | 500.13              |
| 20 Spectral Width         | 10000.0             |
| 21 Lowest Frequency       | -1911.5             |
| 22 Nucleus                | <sup>1</sup> H      |
| 23 Acquired Size          | 32768               |
| 24 Spectral Size          | 65536               |

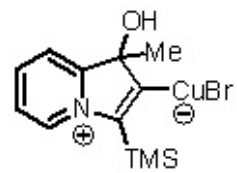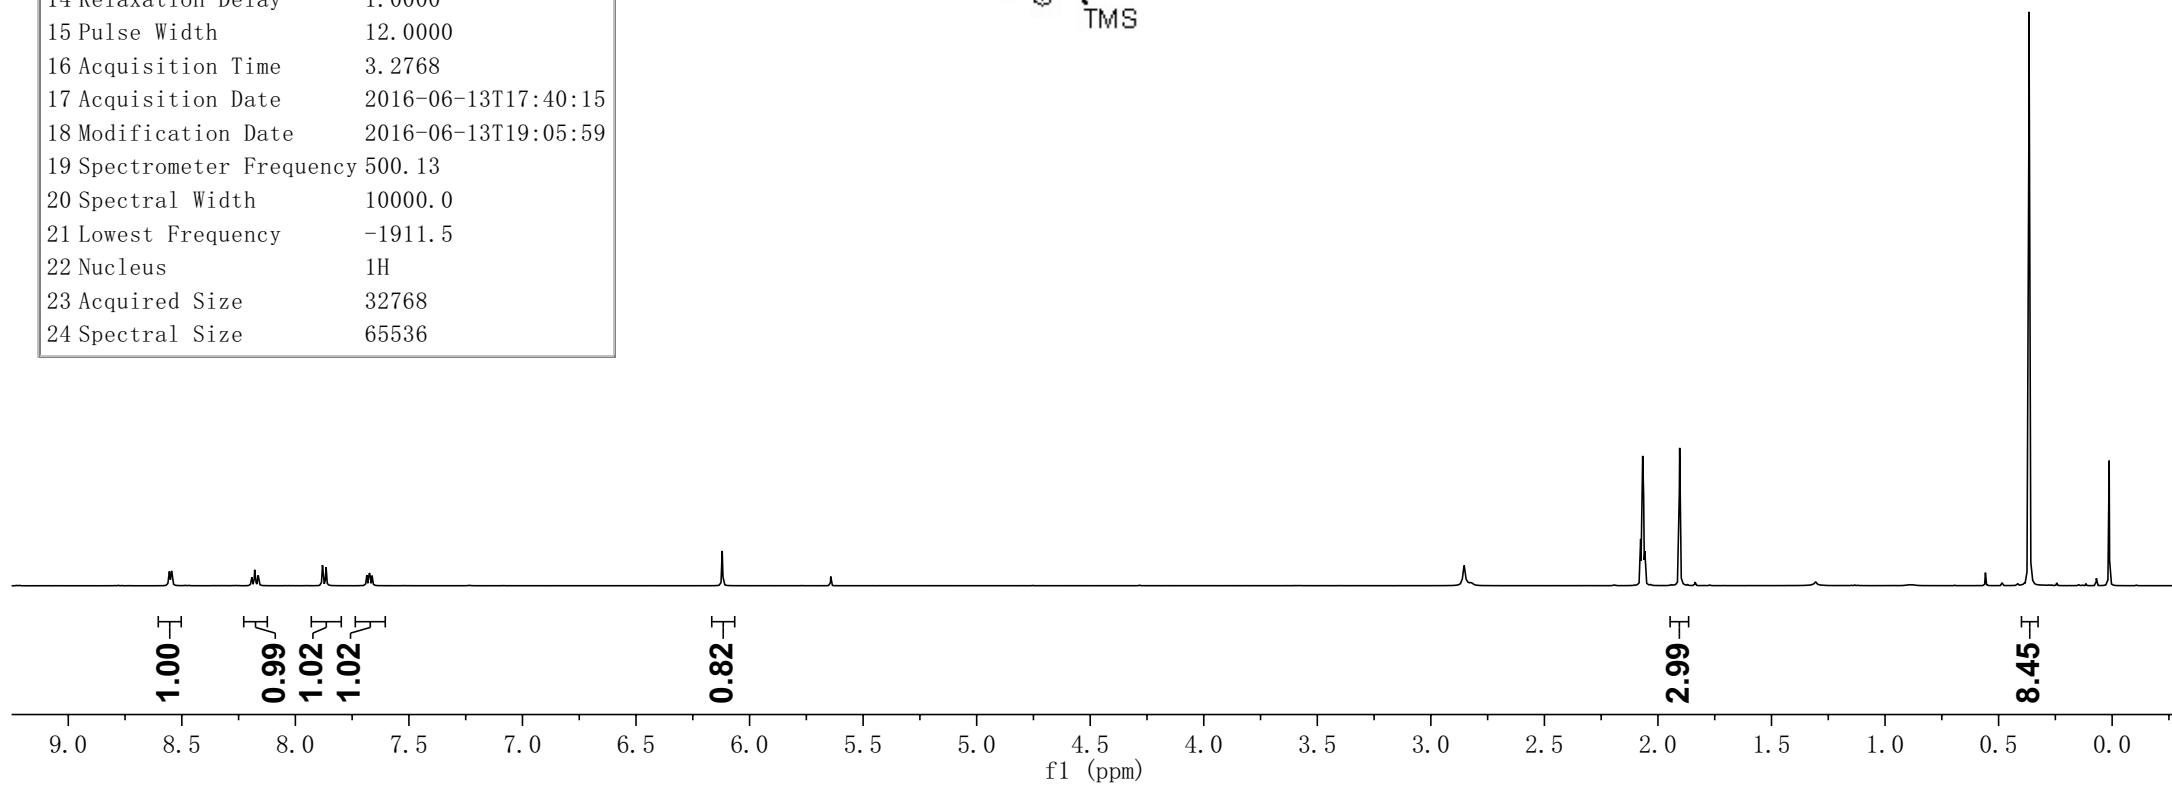



| Parameter                 | Value               |
|---------------------------|---------------------|
| 1 Title                   | YJ-01-124-2         |
| 2 Comment                 |                     |
| 3 Origin                  | Bruker BioSpin GmbH |
| 4 Owner                   | nmr                 |
| 5 Site                    |                     |
| 6 Spectrometer            | spect               |
| 7 Author                  |                     |
| 8 Solvent                 | Acetone             |
| 9 Temperature             | 296.1               |
| 10 Pulse Sequence         | zg30                |
| 11 Experiment             | 1D                  |
| 12 Number of Scans        | 12                  |
| 13 Receiver Gain          | 31                  |
| 14 Relaxation Delay       | 1.0000              |
| 15 Pulse Width            | 10.7100             |
| 16 Acquisition Time       | 3.2768              |
| 17 Acquisition Date       | 2018-04-28T15:18:00 |
| 18 Modification Date      | 2018-05-03T12:17:46 |
| 19 Spectrometer Frequency | 500.13              |
| 20 Spectral Width         | 10000.0             |
| 21 Lowest Frequency       | -1917.7             |
| 22 Nucleus                | <sup>1</sup> H      |
| 23 Acquired Size          | 32768               |
| 24 Spectral Size          | 65536               |

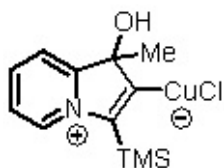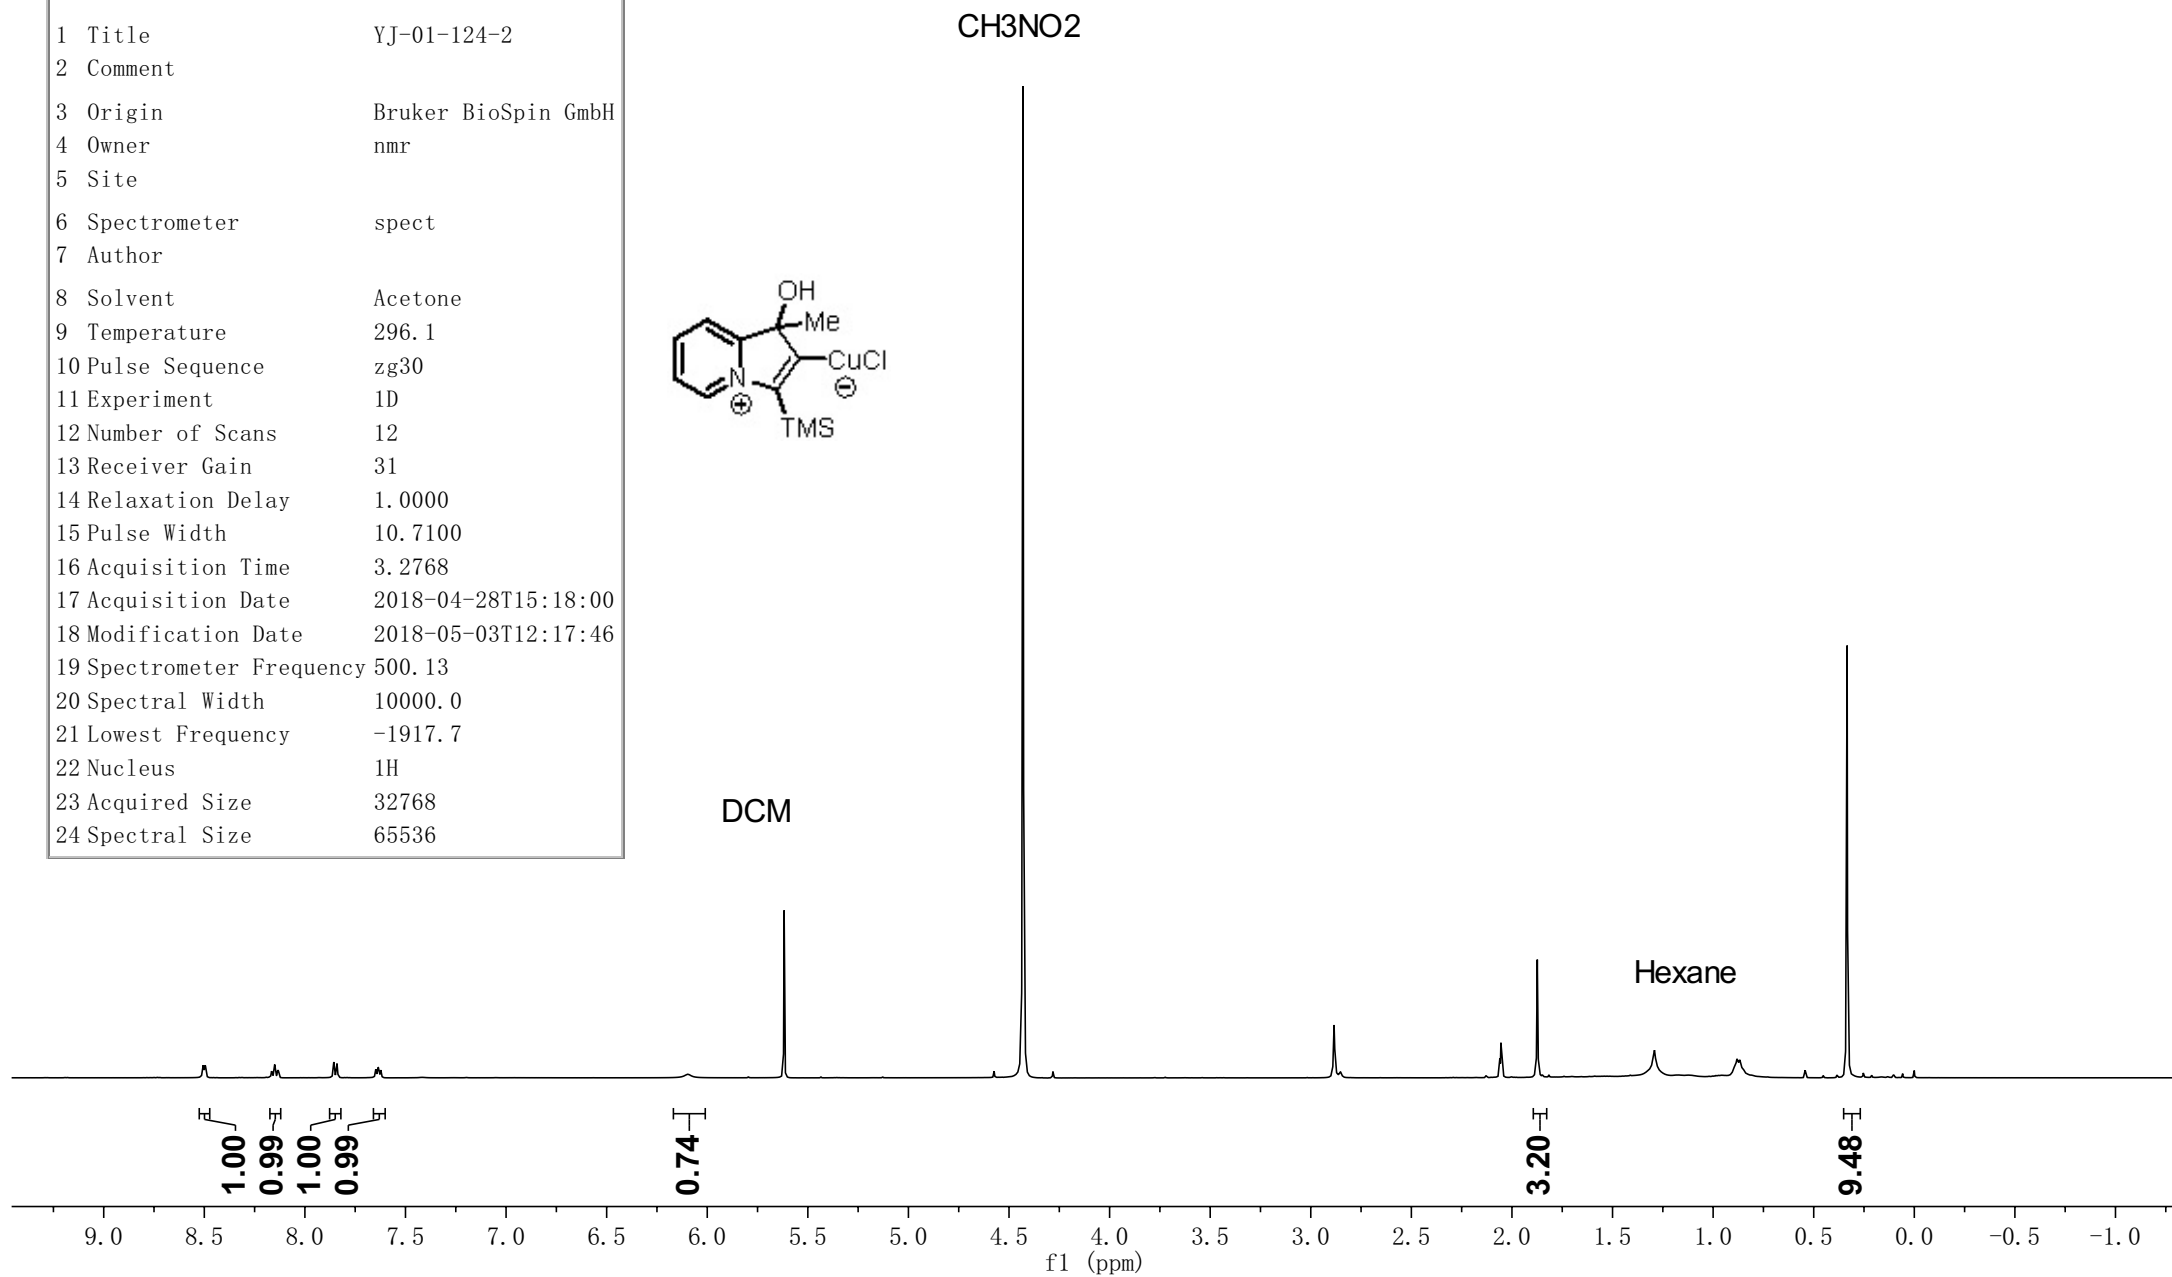

168.97

149.17

142.01

126.83

123.50

112.90

97.55

78.85

33.28

0.90

| Parameter |                        | Value               |
|-----------|------------------------|---------------------|
| 1         | Title                  | YJ-01-124-2         |
| 2         | Comment                |                     |
| 3         | Origin                 | Bruker BioSpin GmbH |
| 4         | Owner                  | nmr                 |
| 5         | Site                   |                     |
| 6         | Spectrometer           | spect               |
| 7         | Author                 |                     |
| 8         | Solvent                | Acetone             |
| 9         | Temperature            | 296.2               |
| 10        | Pulse Sequence         | zgpg30              |
| 11        | Experiment             | 1D                  |
| 12        | Number of Scans        | 49                  |
| 13        | Receiver Gain          | 193                 |
| 14        | Relaxation Delay       | 2.0000              |
| 15        | Pulse Width            | 9.6000              |
| 16        | Acquisition Time       | 1.1010              |
| 17        | Acquisition Date       | 2018-04-28T15:20:00 |
| 18        | Modification Date      | 2018-05-03T12:17:46 |
| 19        | Spectrometer Frequency | 125.76              |
| 20        | Spectral Width         | 29761.9             |
| 21        | Lowest Frequency       | -2069.5             |
| 22        | Nucleus                | 13C                 |
| 23        | Acquired Size          | 32768               |
| 24        | Spectral Size          | 65536               |

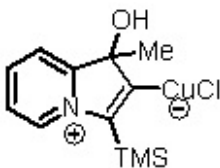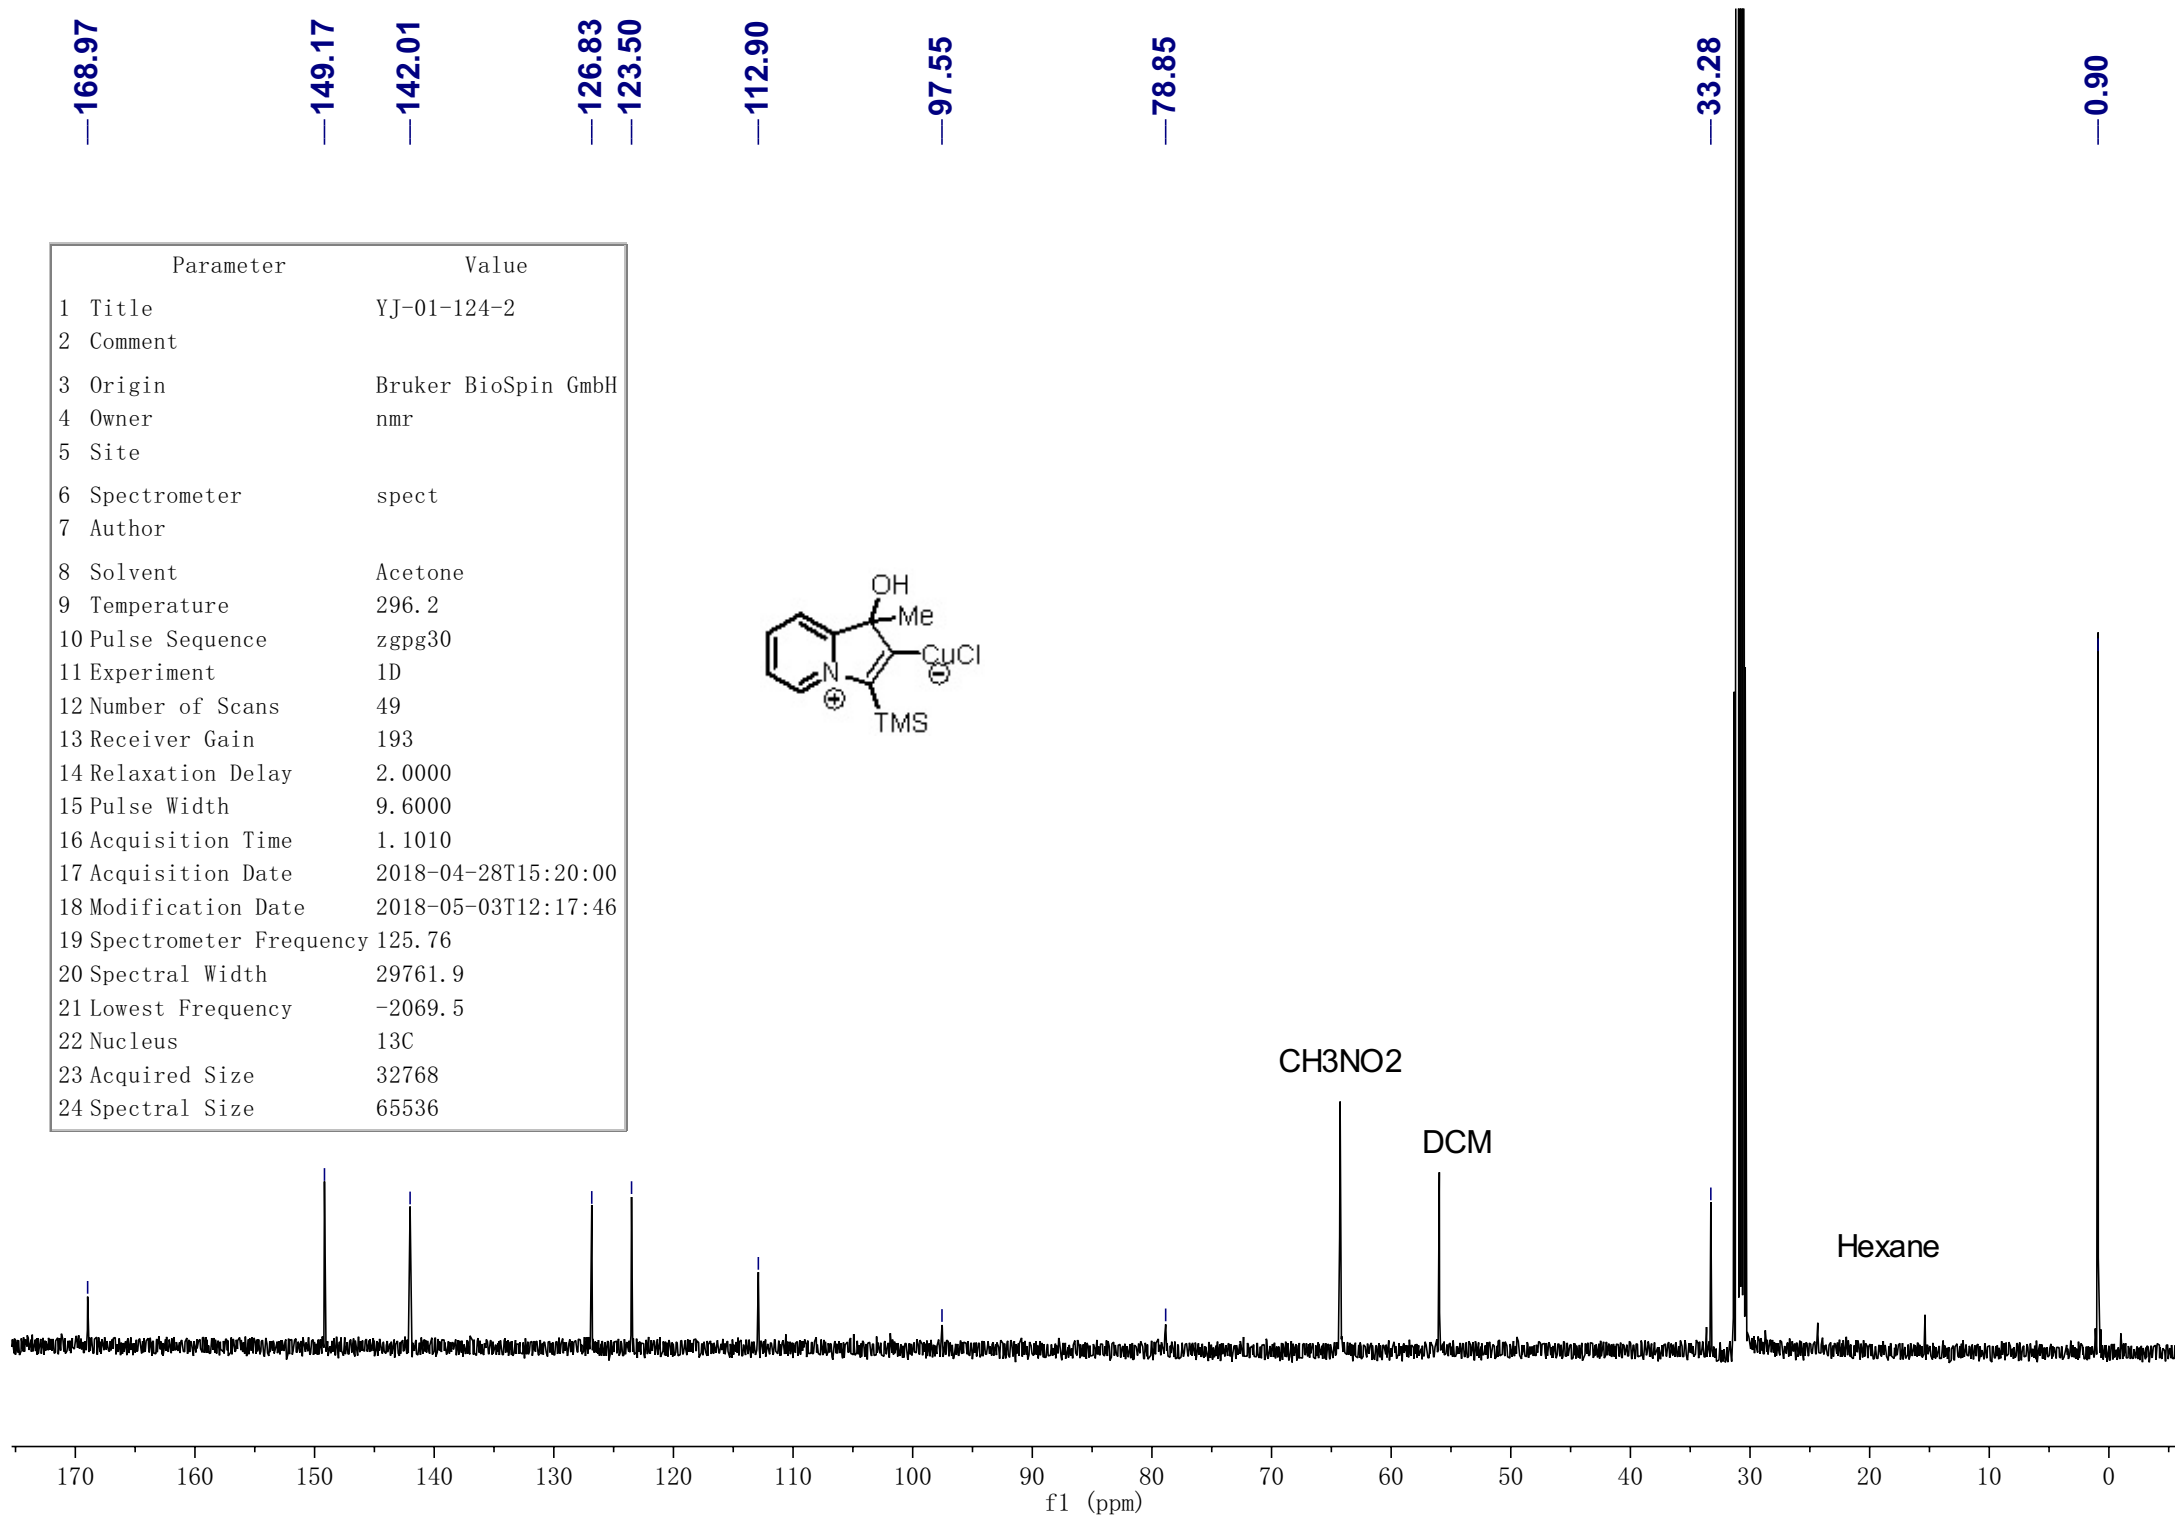

| Parameter                 | Value               |
|---------------------------|---------------------|
| 1 Title                   | YJ-01-67-IR-DMSO    |
| 2 Comment                 |                     |
| 3 Origin                  | Bruker BioSpin GmbH |
| 4 Owner                   | nmr                 |
| 5 Site                    |                     |
| 6 Spectrometer            | spect               |
| 7 Author                  |                     |
| 8 Solvent                 | DMSO                |
| 9 Temperature             | 296.1               |
| 10 Pulse Sequence         | zg30                |
| 11 Experiment             | 1D                  |
| 12 Number of Scans        | 32                  |
| 13 Receiver Gain          | 71                  |
| 14 Relaxation Delay       | 1.0000              |
| 15 Pulse Width            | 10.7100             |
| 16 Acquisition Time       | 3.2768              |
| 17 Acquisition Date       | 2018-03-07T16:12:40 |
| 18 Modification Date      | 2018-03-08T19:40:13 |
| 19 Spectrometer Frequency | 500.13              |
| 20 Spectral Width         | 10000.0             |
| 21 Lowest Frequency       | -1911.5             |
| 22 Nucleus                | <sup>1</sup> H      |
| 23 Acquired Size          | 32768               |
| 24 Spectral Size          | 65536               |

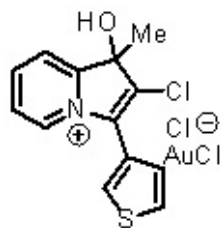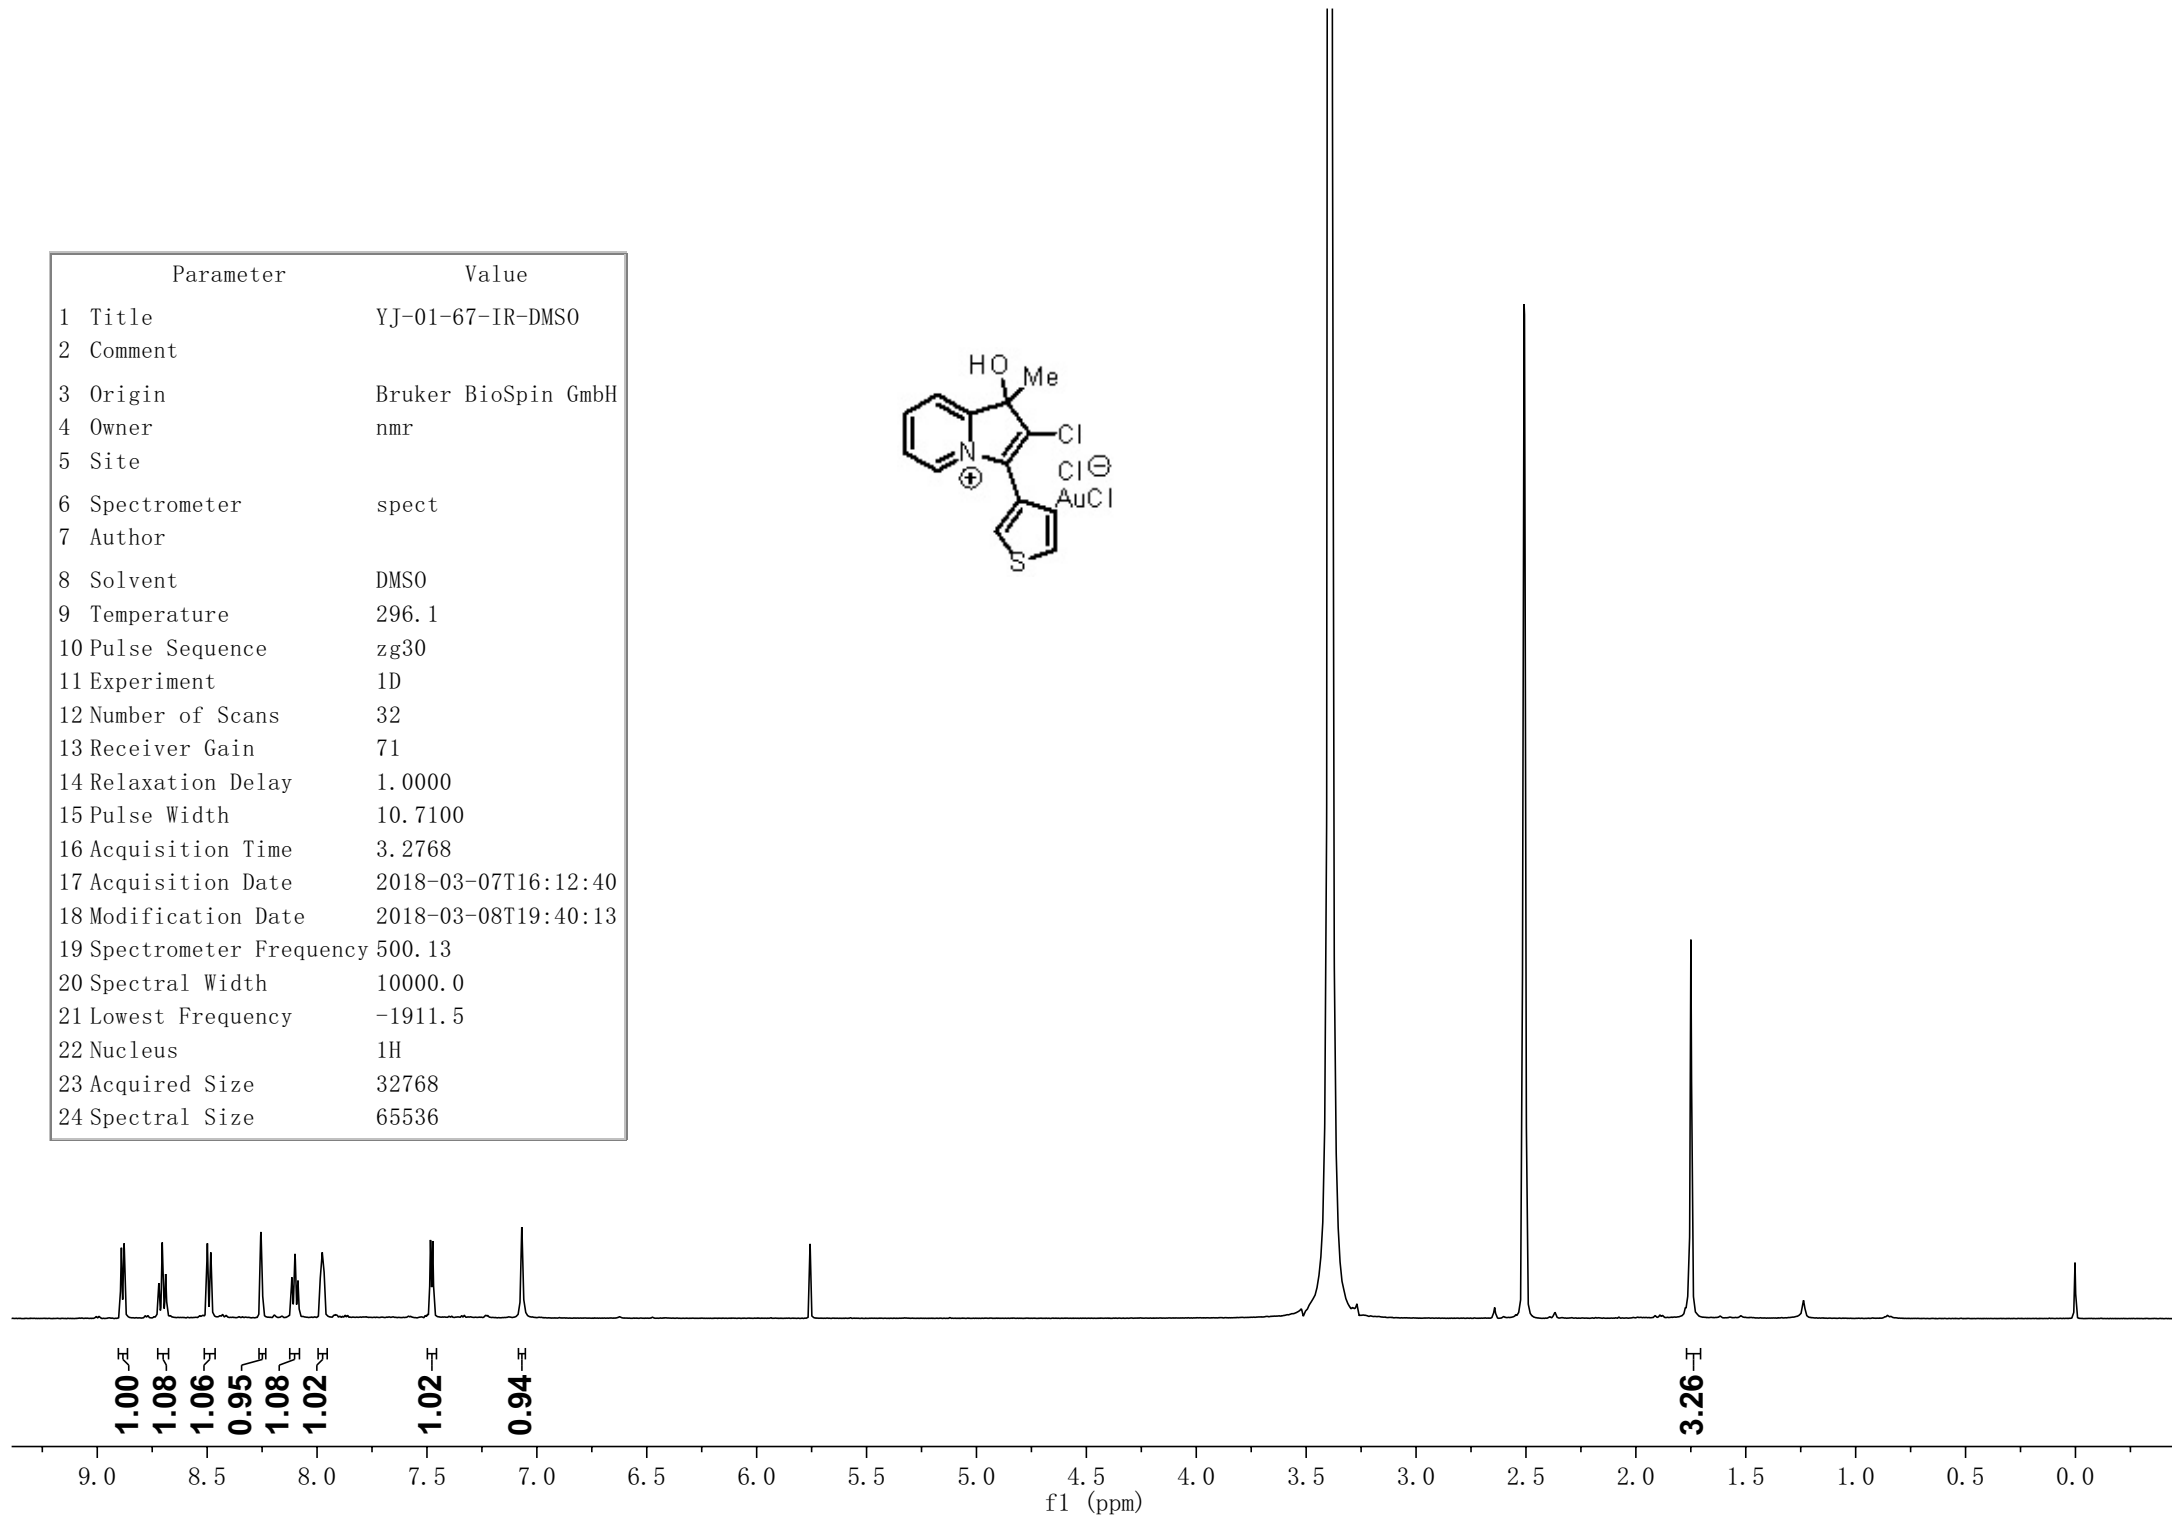

—157.94

—146.31

138.37

137.24

133.23

132.39

129.41

128.29

128.12

123.34

122.80

—79.33

—22.42

| Parameter                 | Value               |
|---------------------------|---------------------|
| 1 Title                   | YJ-01-67-IR-DMSO    |
| 2 Comment                 |                     |
| 3 Origin                  | Bruker BioSpin GmbH |
| 4 Owner                   | nmr                 |
| 5 Site                    |                     |
| 6 Spectrometer            | spect               |
| 7 Author                  |                     |
| 8 Solvent                 | DMSO                |
| 9 Temperature             | 296.2               |
| 10 Pulse Sequence         | zgpg30              |
| 11 Experiment             | 1D                  |
| 12 Number of Scans        | 436                 |
| 13 Receiver Gain          | 193                 |
| 14 Relaxation Delay       | 2.0000              |
| 15 Pulse Width            | 9.6000              |
| 16 Acquisition Time       | 1.1010              |
| 17 Acquisition Date       | 2018-03-07T17:38:00 |
| 18 Modification Date      | 2018-03-08T19:40:13 |
| 19 Spectrometer Frequency | 125.77              |
| 20 Spectral Width         | 29761.9             |
| 21 Lowest Frequency       | -2305.8             |
| 22 Nucleus                | 13C                 |
| 23 Acquired Size          | 32768               |
| 24 Spectral Size          | 65536               |

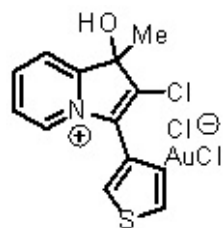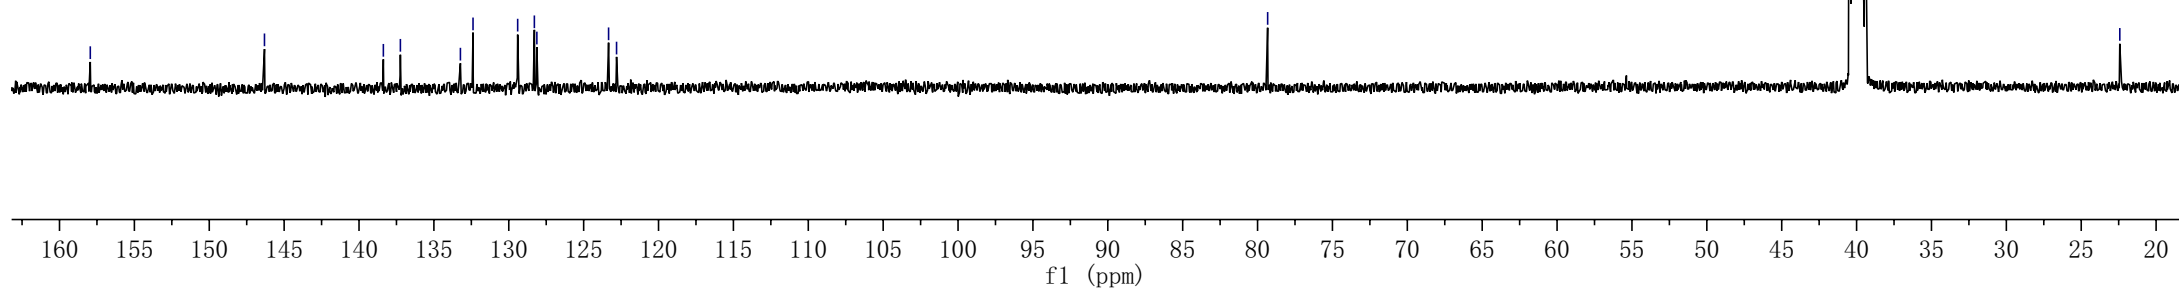

| Parameter                 | Value               |
|---------------------------|---------------------|
| 1 Title                   | YJ-01-93-IR-DMSO    |
| 2 Comment                 |                     |
| 3 Origin                  | Bruker BioSpin GmbH |
| 4 Owner                   | nmr                 |
| 5 Site                    |                     |
| 6 Spectrometer            | spect               |
| 7 Author                  |                     |
| 8 Solvent                 | DMSO                |
| 9 Temperature             | 296.1               |
| 10 Pulse Sequence         | zg30                |
| 11 Experiment             | 1D                  |
| 12 Number of Scans        | 16                  |
| 13 Receiver Gain          | 78                  |
| 14 Relaxation Delay       | 1.0000              |
| 15 Pulse Width            | 10.7100             |
| 16 Acquisition Time       | 3.2768              |
| 17 Acquisition Date       | 2018-01-27T18:44:00 |
| 18 Modification Date      | 2018-01-29T14:09:16 |
| 19 Spectrometer Frequency | 500.13              |
| 20 Spectral Width         | 10000.0             |
| 21 Lowest Frequency       | -1914.6             |
| 22 Nucleus                | <sup>1</sup> H      |
| 23 Acquired Size          | 32768               |
| 24 Spectral Size          | 65536               |

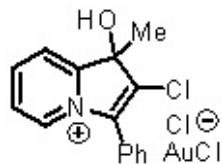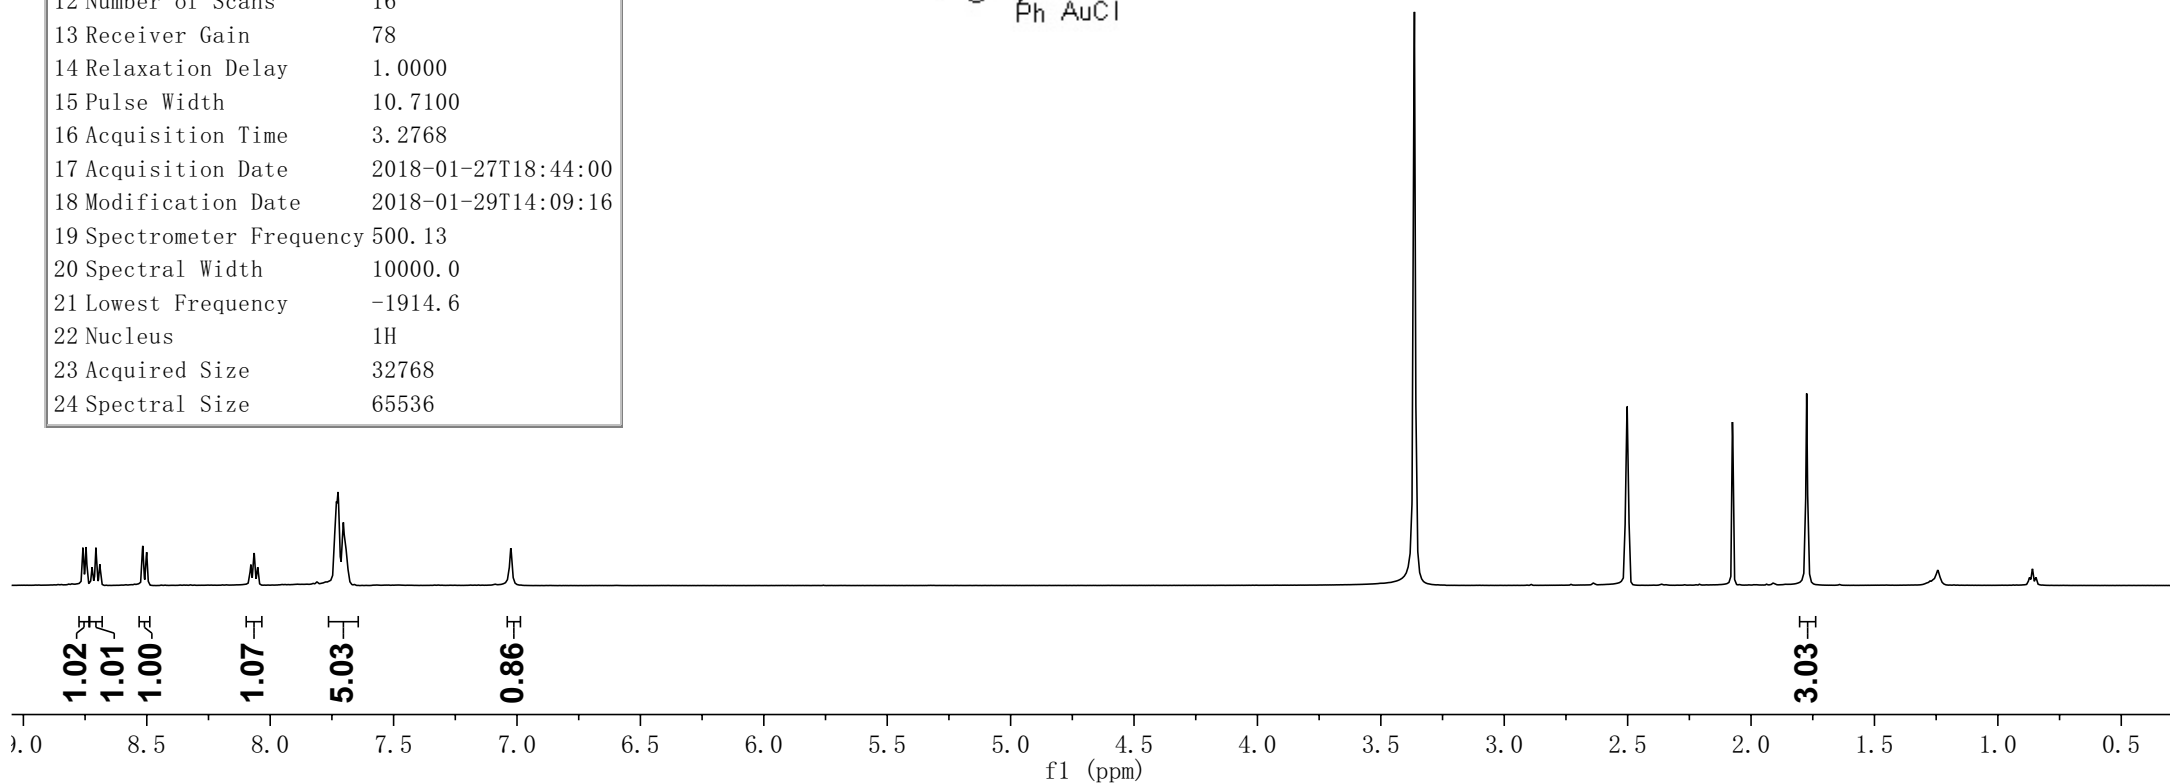

—158.10

—146.38

—138.65 [8]

—137.14

—137.07

—132.24

—130.91

—130.18

—128.18

—123.46

—123.36

—79.53

—22.33

| Parameter                 | Value               |
|---------------------------|---------------------|
| 1 Title                   | YJ-01-93-IR-DMSO    |
| 2 Comment                 |                     |
| 3 Origin                  | Bruker BioSpin GmbH |
| 4 Owner                   | nmr                 |
| 5 Site                    |                     |
| 6 Spectrometer            | spect               |
| 7 Author                  |                     |
| 8 Solvent                 | DMSO                |
| 9 Temperature             | 296.1               |
| 10 Pulse Sequence         | zgpg30              |
| 11 Experiment             | 1D                  |
| 12 Number of Scans        | 821                 |
| 13 Receiver Gain          | 193                 |
| 14 Relaxation Delay       | 2.0000              |
| 15 Pulse Width            | 9.6000              |
| 16 Acquisition Time       | 1.1010              |
| 17 Acquisition Date       | 2018-01-27T18:50:00 |
| 18 Modification Date      | 2018-01-29T14:09:17 |
| 19 Spectrometer Frequency | 125.76              |
| 20 Spectral Width         | 29761.9             |
| 21 Lowest Frequency       | -2302.7             |
| 22 Nucleus                | <sup>13</sup> C     |
| 23 Acquired Size          | 32768               |
| 24 Spectral Size          | 65536               |

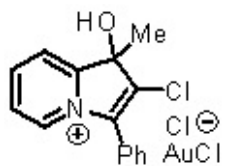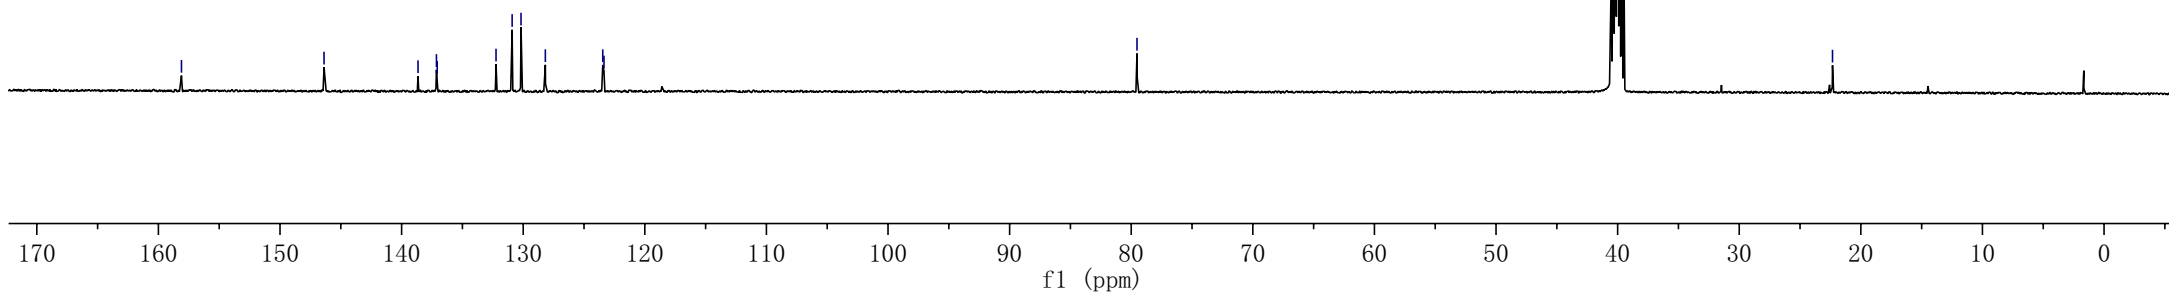

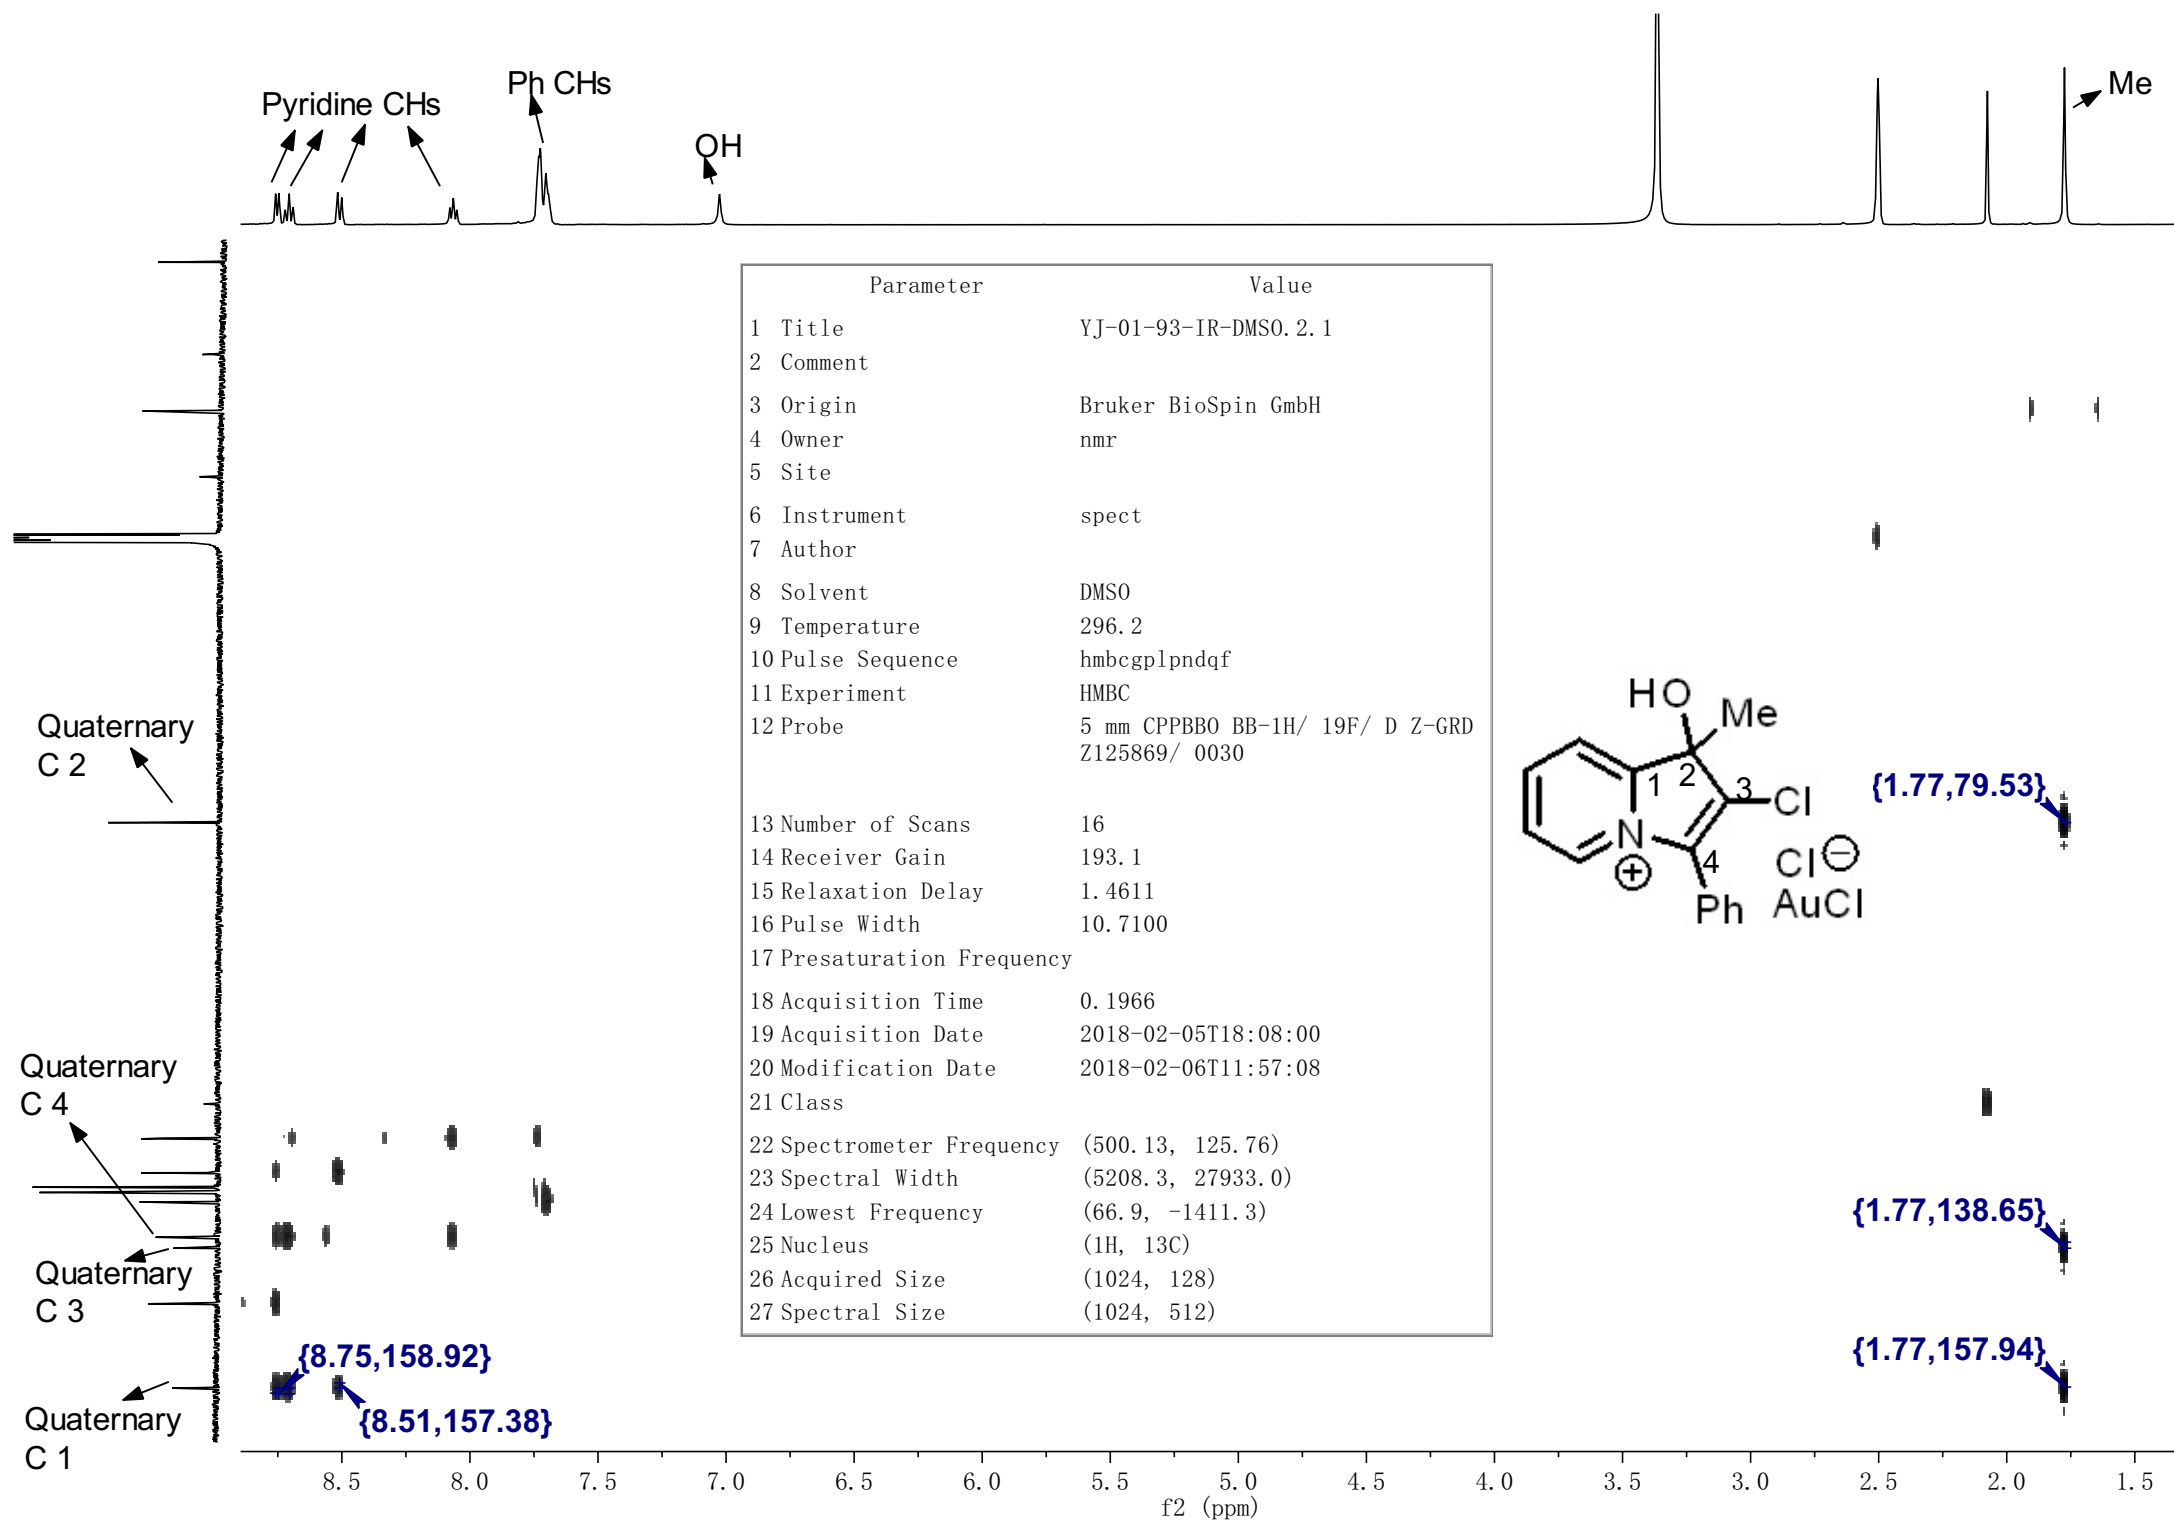

| Parameter                 | Value                   |
|---------------------------|-------------------------|
| 1 Title                   | YJ-01-89-DMSO-CONVERTED |
| 2 Comment                 |                         |
| 3 Origin                  | Bruker BioSpin GmbH     |
| 4 Owner                   | nmr                     |
| 5 Site                    |                         |
| 6 Spectrometer            | spect                   |
| 7 Author                  |                         |
| 8 Solvent                 | DMSO                    |
| 9 Temperature             | 296.1                   |
| 10 Pulse Sequence         | zg30                    |
| 11 Experiment             | 1D                      |
| 12 Number of Scans        | 16                      |
| 13 Receiver Gain          | 88                      |
| 14 Relaxation Delay       | 1.0000                  |
| 15 Pulse Width            | 10.7100                 |
| 16 Acquisition Time       | 3.2768                  |
| 17 Acquisition Date       | 2018-07-20T06:33:07     |
| 18 Modification Date      | 2018-07-23T17:51:42     |
| 19 Spectrometer Frequency | 500.13                  |
| 20 Spectral Width         | 10000.0                 |
| 21 Lowest Frequency       | -1911.5                 |
| 22 Nucleus                | <sup>1</sup> H          |
| 23 Acquired Size          | 32768                   |
| 24 Spectral Size          | 65536                   |

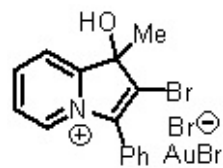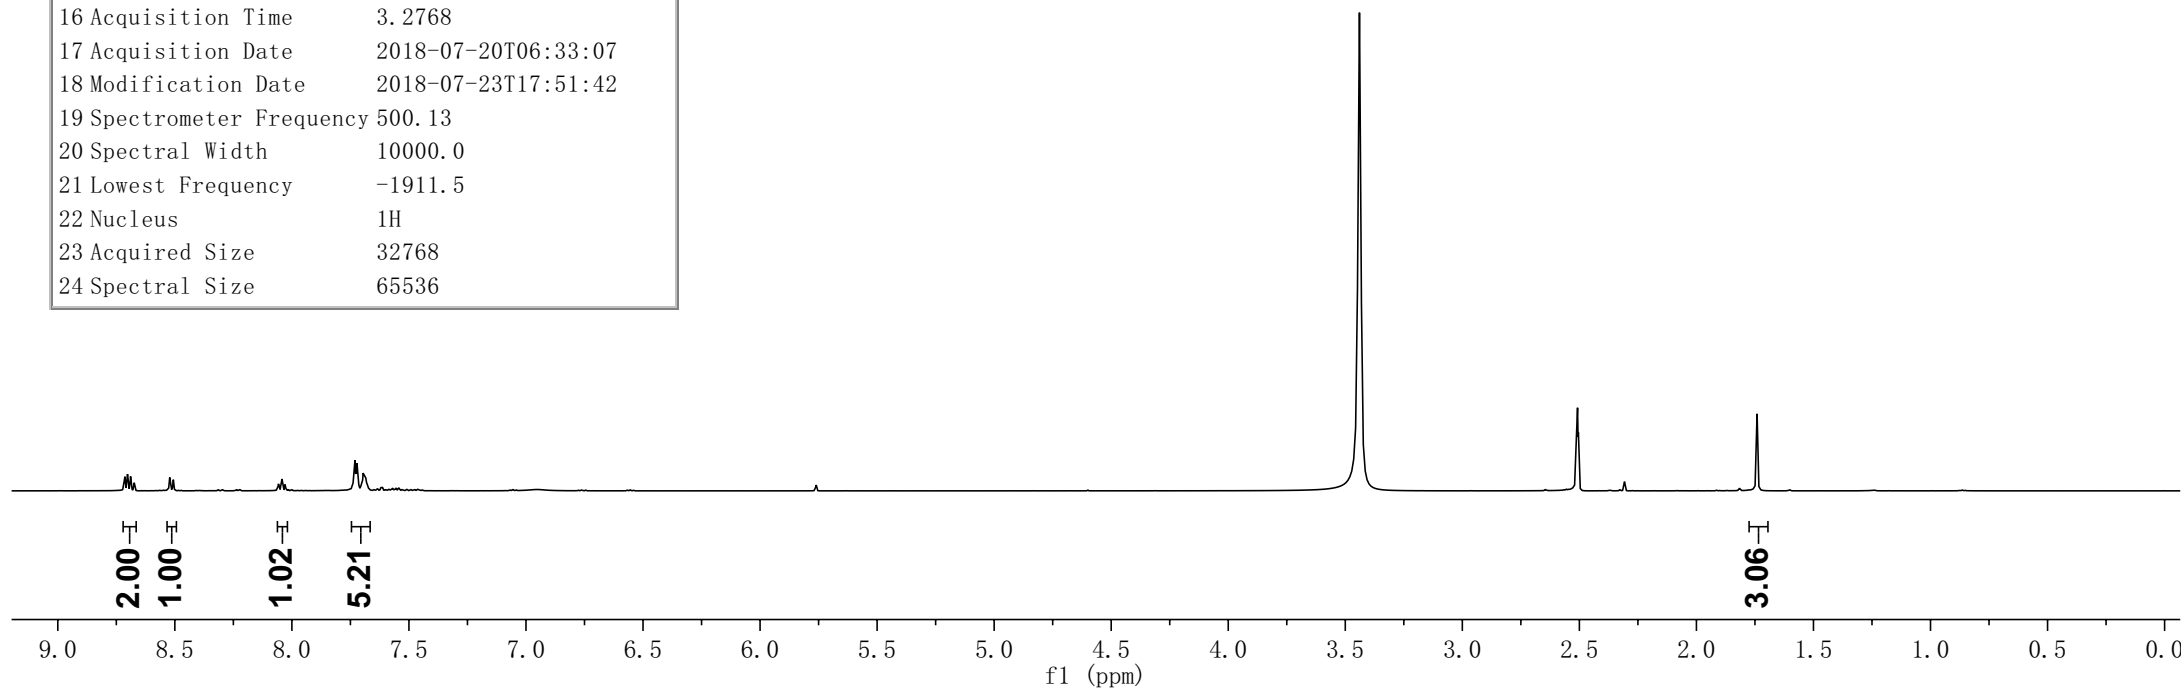

—158.92

—146.06

—139.04

—136.88

—132.10

—131.52

—130.90

—130.11

—128.11

—124.35

—123.53

—80.51

—23.12

| Parameter                 | Value                   |
|---------------------------|-------------------------|
| 1 Title                   | YJ-01-89-DMSO-CONVERTED |
| 2 Comment                 |                         |
| 3 Origin                  | Bruker BioSpin GmbH     |
| 4 Owner                   | nmr                     |
| 5 Site                    |                         |
| 6 Spectrometer            | spect                   |
| 7 Author                  |                         |
| 8 Solvent                 | DMSO                    |
| 9 Temperature             | 296.1                   |
| 10 Pulse Sequence         | zgpg30                  |
| 11 Experiment             | 1D                      |
| 12 Number of Scans        | 2000                    |
| 13 Receiver Gain          | 193                     |
| 14 Relaxation Delay       | 2.0000                  |
| 15 Pulse Width            | 9.6000                  |
| 16 Acquisition Time       | 1.1010                  |
| 17 Acquisition Date       | 2018-07-20T08:19:54     |
| 18 Modification Date      | 2018-07-23T17:51:42     |
| 19 Spectrometer Frequency | 125.77                  |
| 20 Spectral Width         | 29761.9                 |
| 21 Lowest Frequency       | -2305.8                 |
| 22 Nucleus                | 13C                     |
| 23 Acquired Size          | 32768                   |
| 24 Spectral Size          | 65536                   |

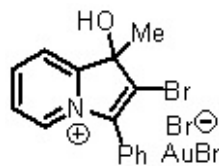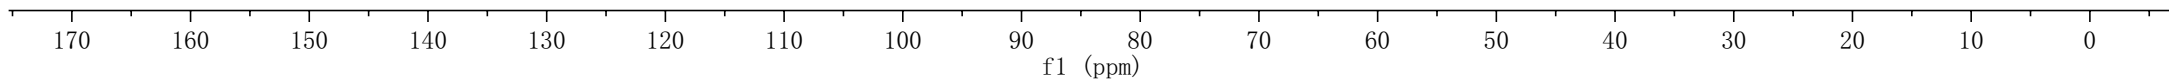

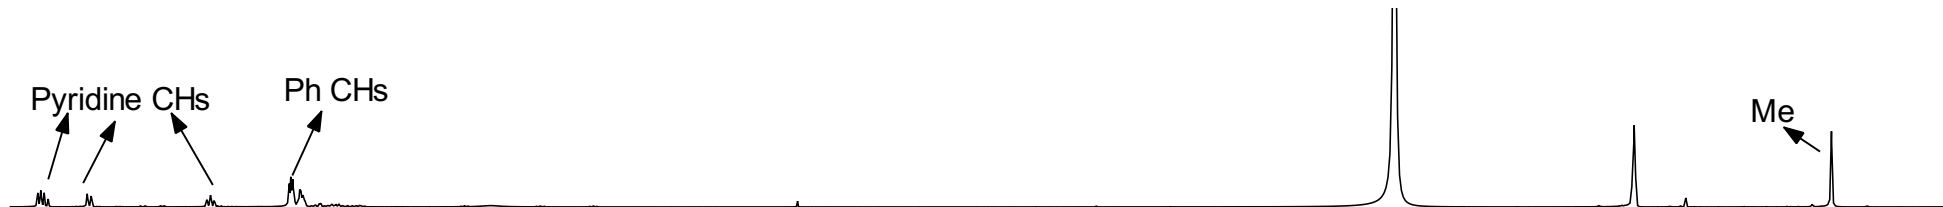

| Parameter                 | Value                   |
|---------------------------|-------------------------|
| 1 Title                   | YJ-01-89-DMSO-CONVERTED |
| 2 Comment                 |                         |
| 3 Origin                  | Bruker BioSpin GmbH     |
| 4 Owner                   | nmr                     |
| 5 Site                    |                         |
| 6 Spectrometer            | spect                   |
| 7 Author                  |                         |
| 8 Solvent                 | DMSO                    |
| 9 Temperature             | 296.1                   |
| 10 Pulse Sequence         | hmbcgplpndqf            |
| 11 Experiment             | 2D-HMBC                 |
| 12 Number of Scans        | 4                       |
| 13 Receiver Gain          | 193                     |
| 14 Relaxation Delay       | 1.4222                  |
| 15 Pulse Width            | 10.7100                 |
| 16 Acquisition Time       | 0.2355                  |
| 17 Acquisition Date       | 2018-07-20T08:36:05     |
| 18 Modification Date      | 2018-07-23T17:51:43     |
| 19 Spectrometer Frequency | (500.13, 125.77)        |
| 20 Spectral Width         | (4347.8, 27933.0)       |
| 21 Lowest Frequency       | (469.6, -1411.3)        |
| 22 Nucleus                | (1H, 13C)               |
| 23 Acquired Size          | (1024, 128)             |
| 24 Spectral Size          | (1024, 512)             |

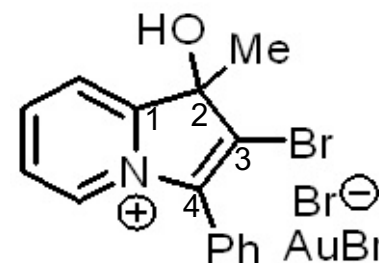

{1.74,80.50}

{1.74,131.50}

{1.74,158.91}

{8.70,139.33}

{7.70,139.04}

{8.51,159.00}

{8.70,158.93}

Quaternary  
C 2

Quaternary  
C 3

Quaternary  
C 4

Quaternary  
C 1

f2 (ppm)

|    | Parameter              | Value               |
|----|------------------------|---------------------|
| 1  | Title                  | YJ-01-114-CONVERTED |
| 2  | Comment                |                     |
| 3  | Origin                 | Bruker BioSpin GmbH |
| 4  | Owner                  | nmr                 |
| 5  | Site                   |                     |
| 6  | Spectrometer           | spect               |
| 7  | Author                 |                     |
| 8  | Solvent                | Acetone             |
| 9  | Temperature            | 296.1               |
| 10 | Pulse Sequence         | zg30                |
| 11 | Experiment             | 1D                  |
| 12 | Number of Scans        | 32                  |
| 13 | Receiver Gain          | 108                 |
| 14 | Relaxation Delay       | 1.0000              |
| 15 | Pulse Width            | 10.7100             |
| 16 | Acquisition Time       | 3.2768              |
| 17 | Acquisition Date       | 2018-07-05T03:55:55 |
| 18 | Modification Date      | 2018-07-05T14:53:58 |
| 19 | Spectrometer Frequency | 500.13              |
| 20 | Spectral Width         | 10000.0             |
| 21 | Lowest Frequency       | -1917.5             |
| 22 | Nucleus                | <sup>1</sup> H      |
| 23 | Acquired Size          | 32768               |
| 24 | Spectral Size          | 65536               |

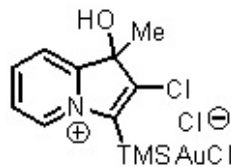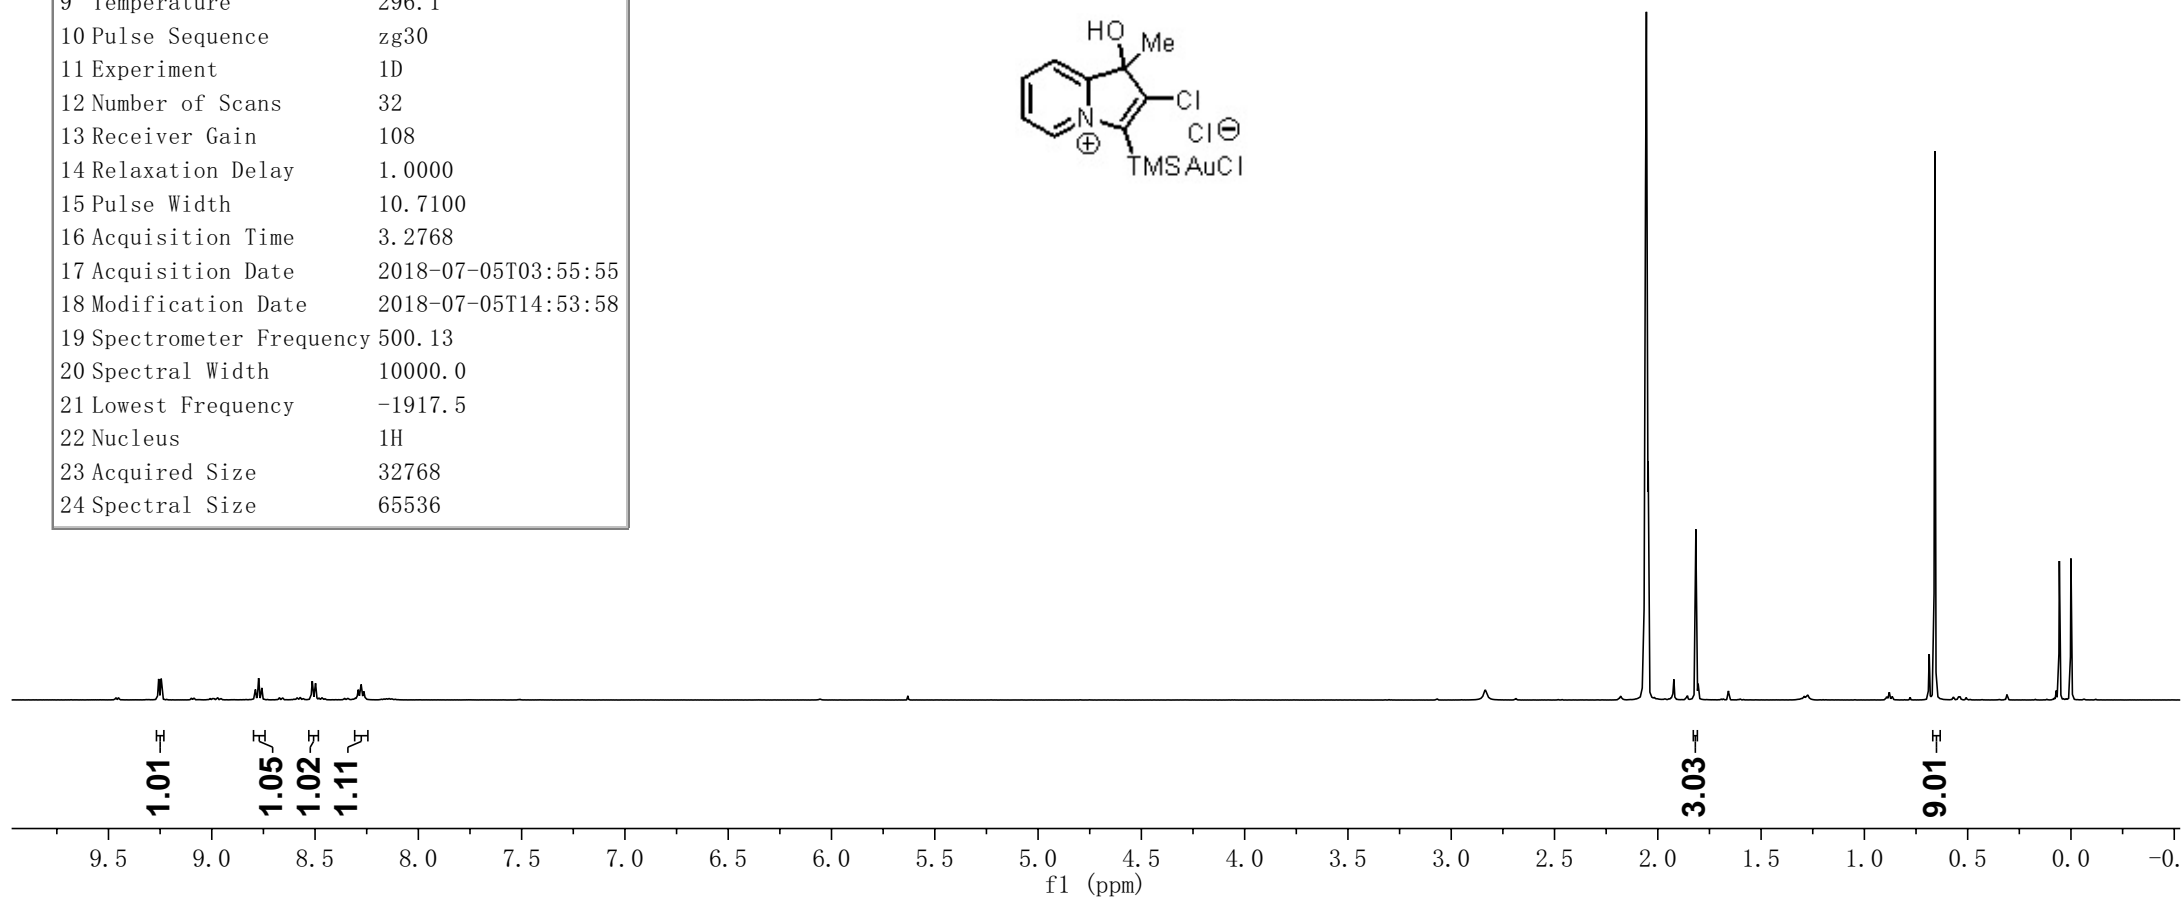

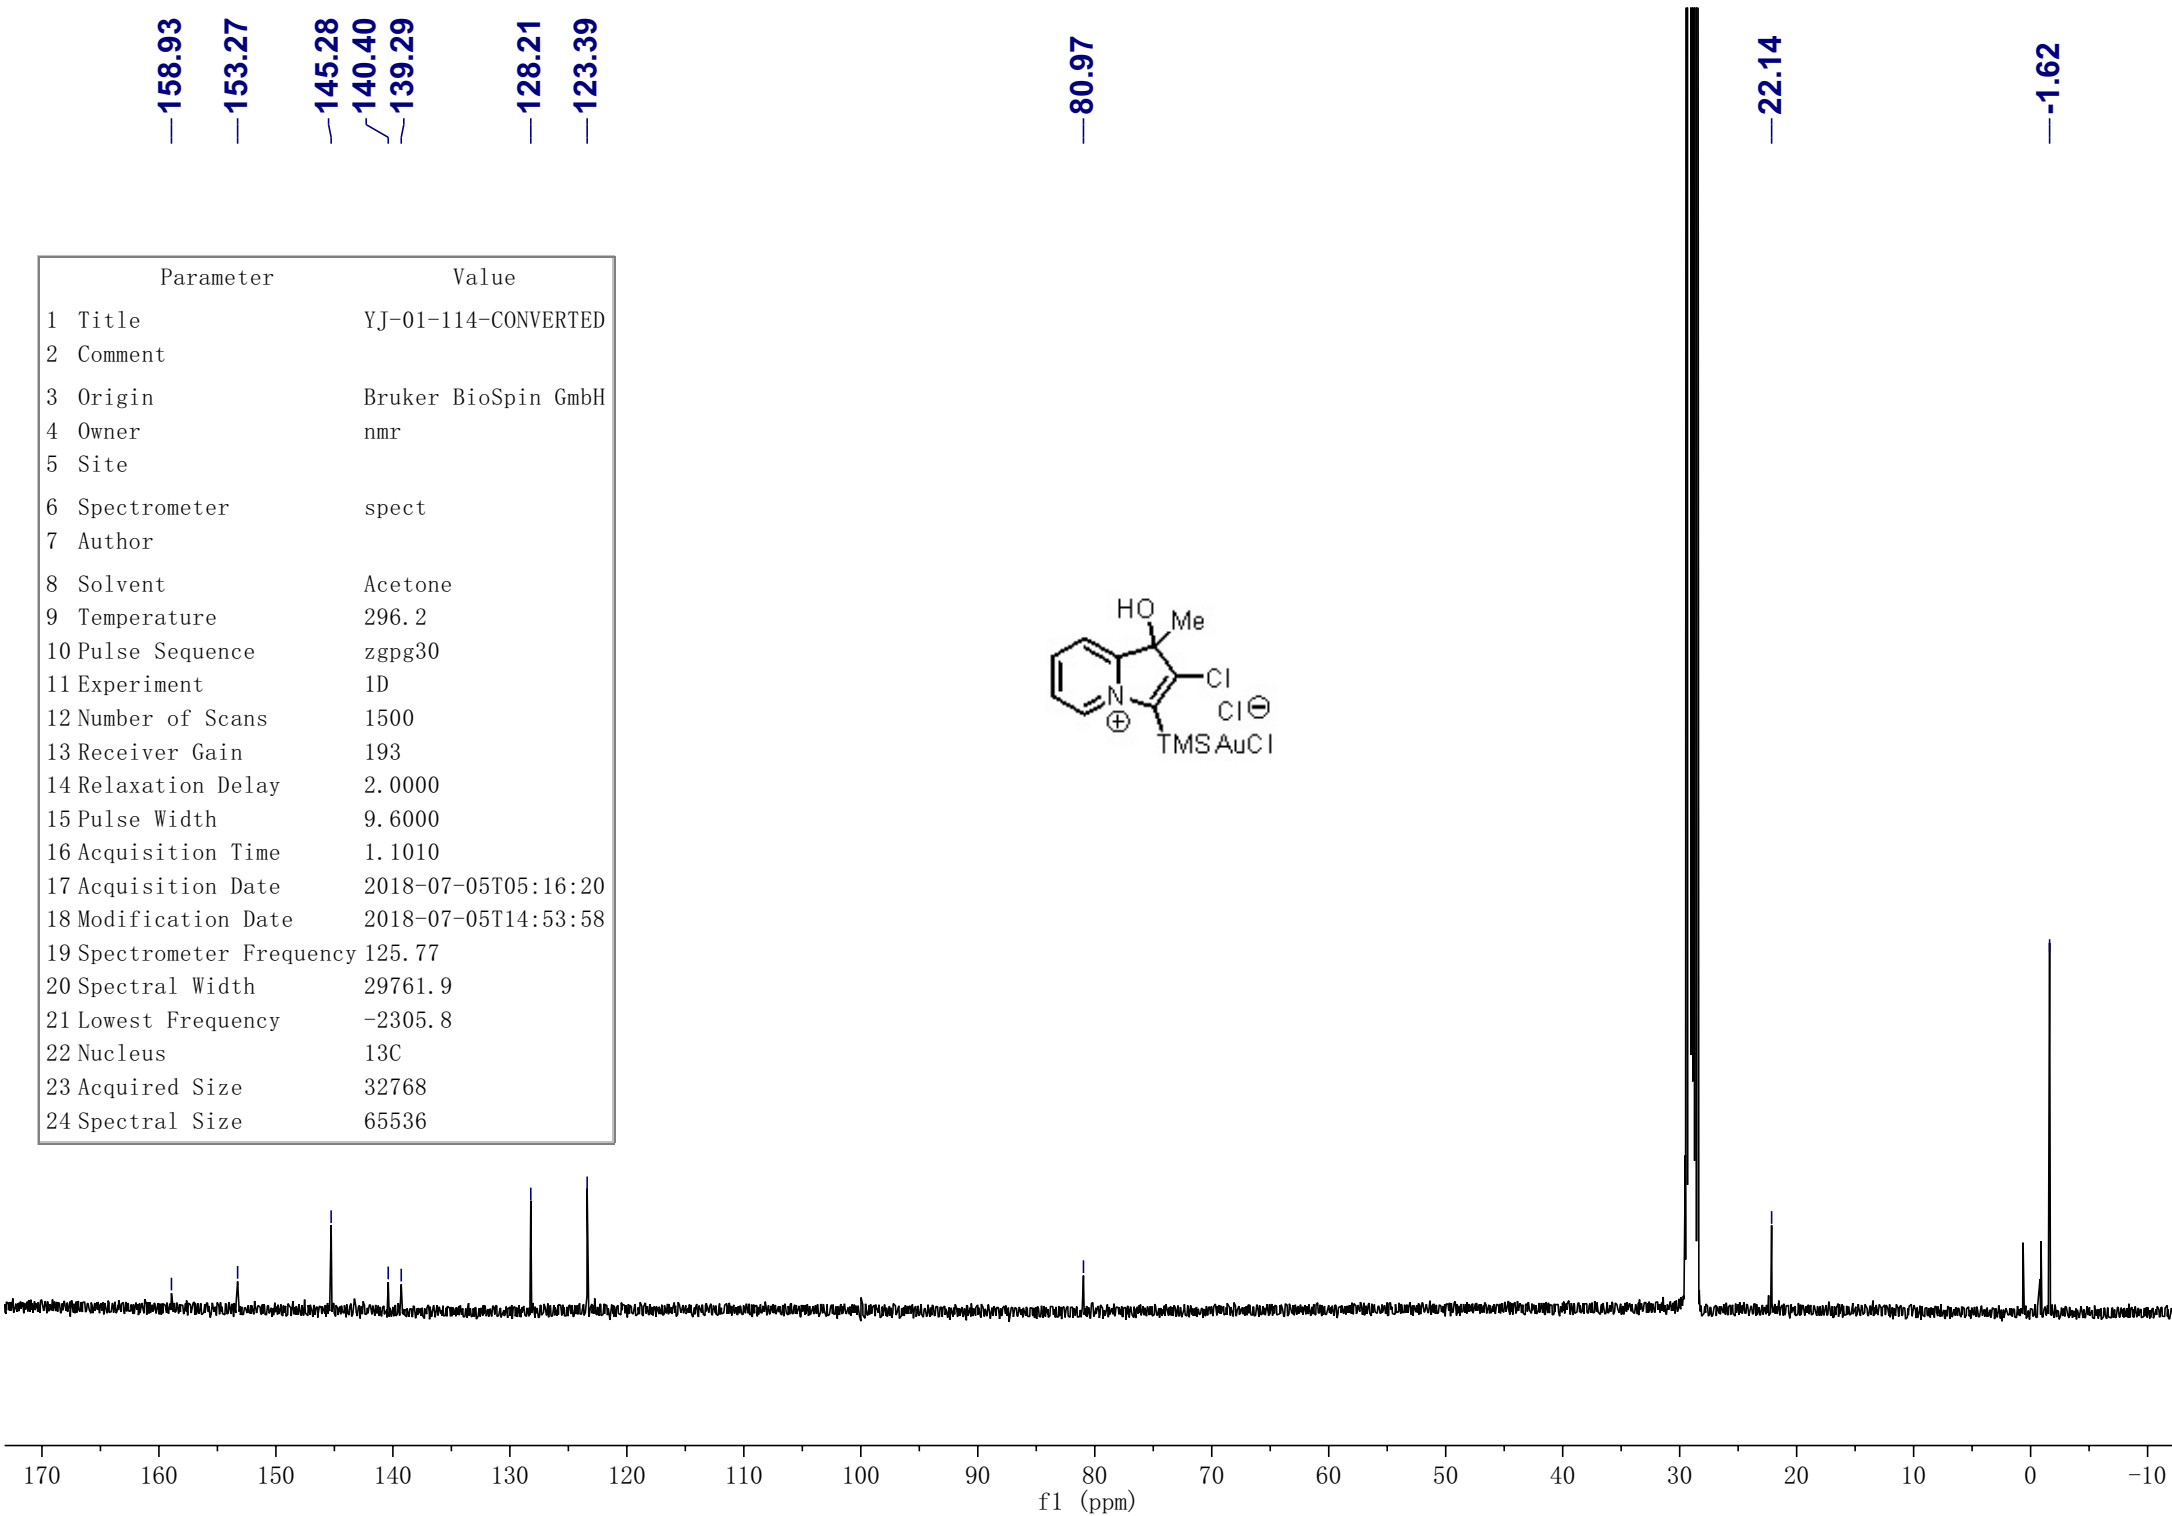

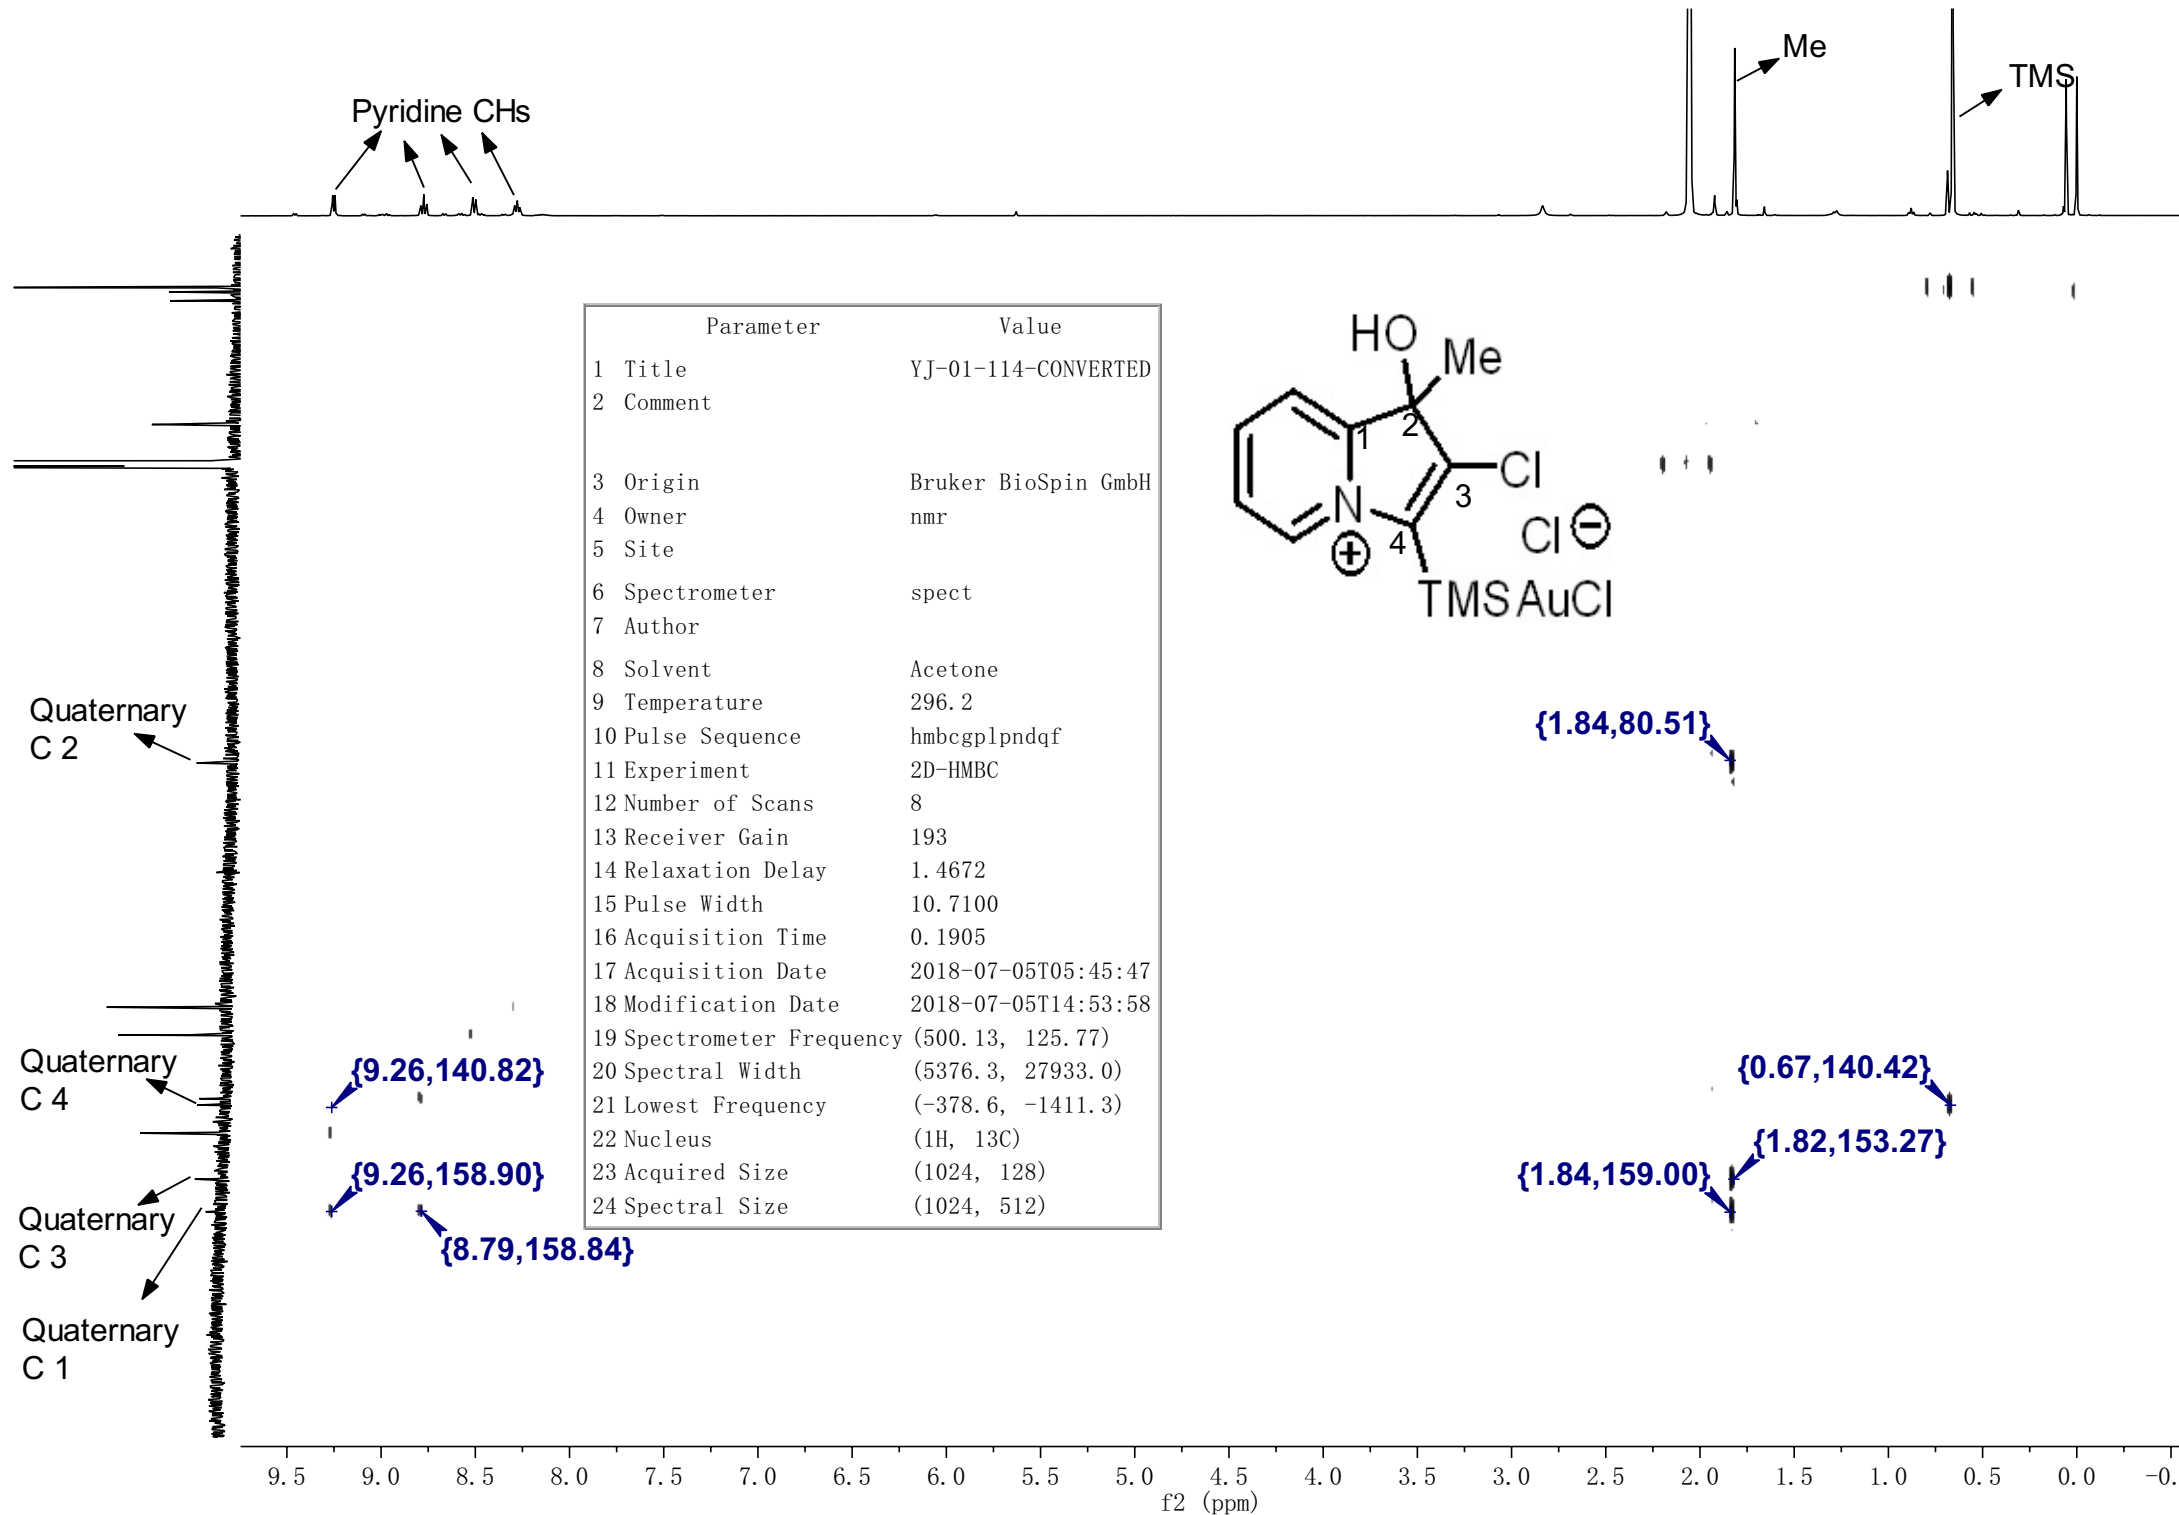

|    | Parameter              | Value               |
|----|------------------------|---------------------|
| 1  | Title                  | YJ-01-130-IR-4      |
| 2  | Comment                |                     |
| 3  | Origin                 | Bruker BioSpin GmbH |
| 4  | Owner                  | nmr                 |
| 5  | Site                   |                     |
| 6  | Spectrometer           | spect               |
| 7  | Author                 |                     |
| 8  | Solvent                | Acetone             |
| 9  | Temperature            | 296.2               |
| 10 | Pulse Sequence         | zg30                |
| 11 | Experiment             | 1D                  |
| 12 | Number of Scans        | 16                  |
| 13 | Receiver Gain          | 125                 |
| 14 | Relaxation Delay       | 1.0000              |
| 15 | Pulse Width            | 10.7100             |
| 16 | Acquisition Time       | 3.2768              |
| 17 | Acquisition Date       | 2018-07-09T17:31:11 |
| 18 | Modification Date      | 2018-07-09T19:00:06 |
| 19 | Spectrometer Frequency | 500.13              |
| 20 | Spectral Width         | 10000.0             |
| 21 | Lowest Frequency       | -1917.8             |
| 22 | Nucleus                | <sup>1</sup> H      |
| 23 | Acquired Size          | 32768               |
| 24 | Spectral Size          | 65536               |

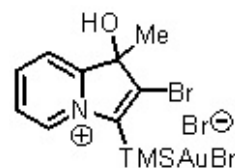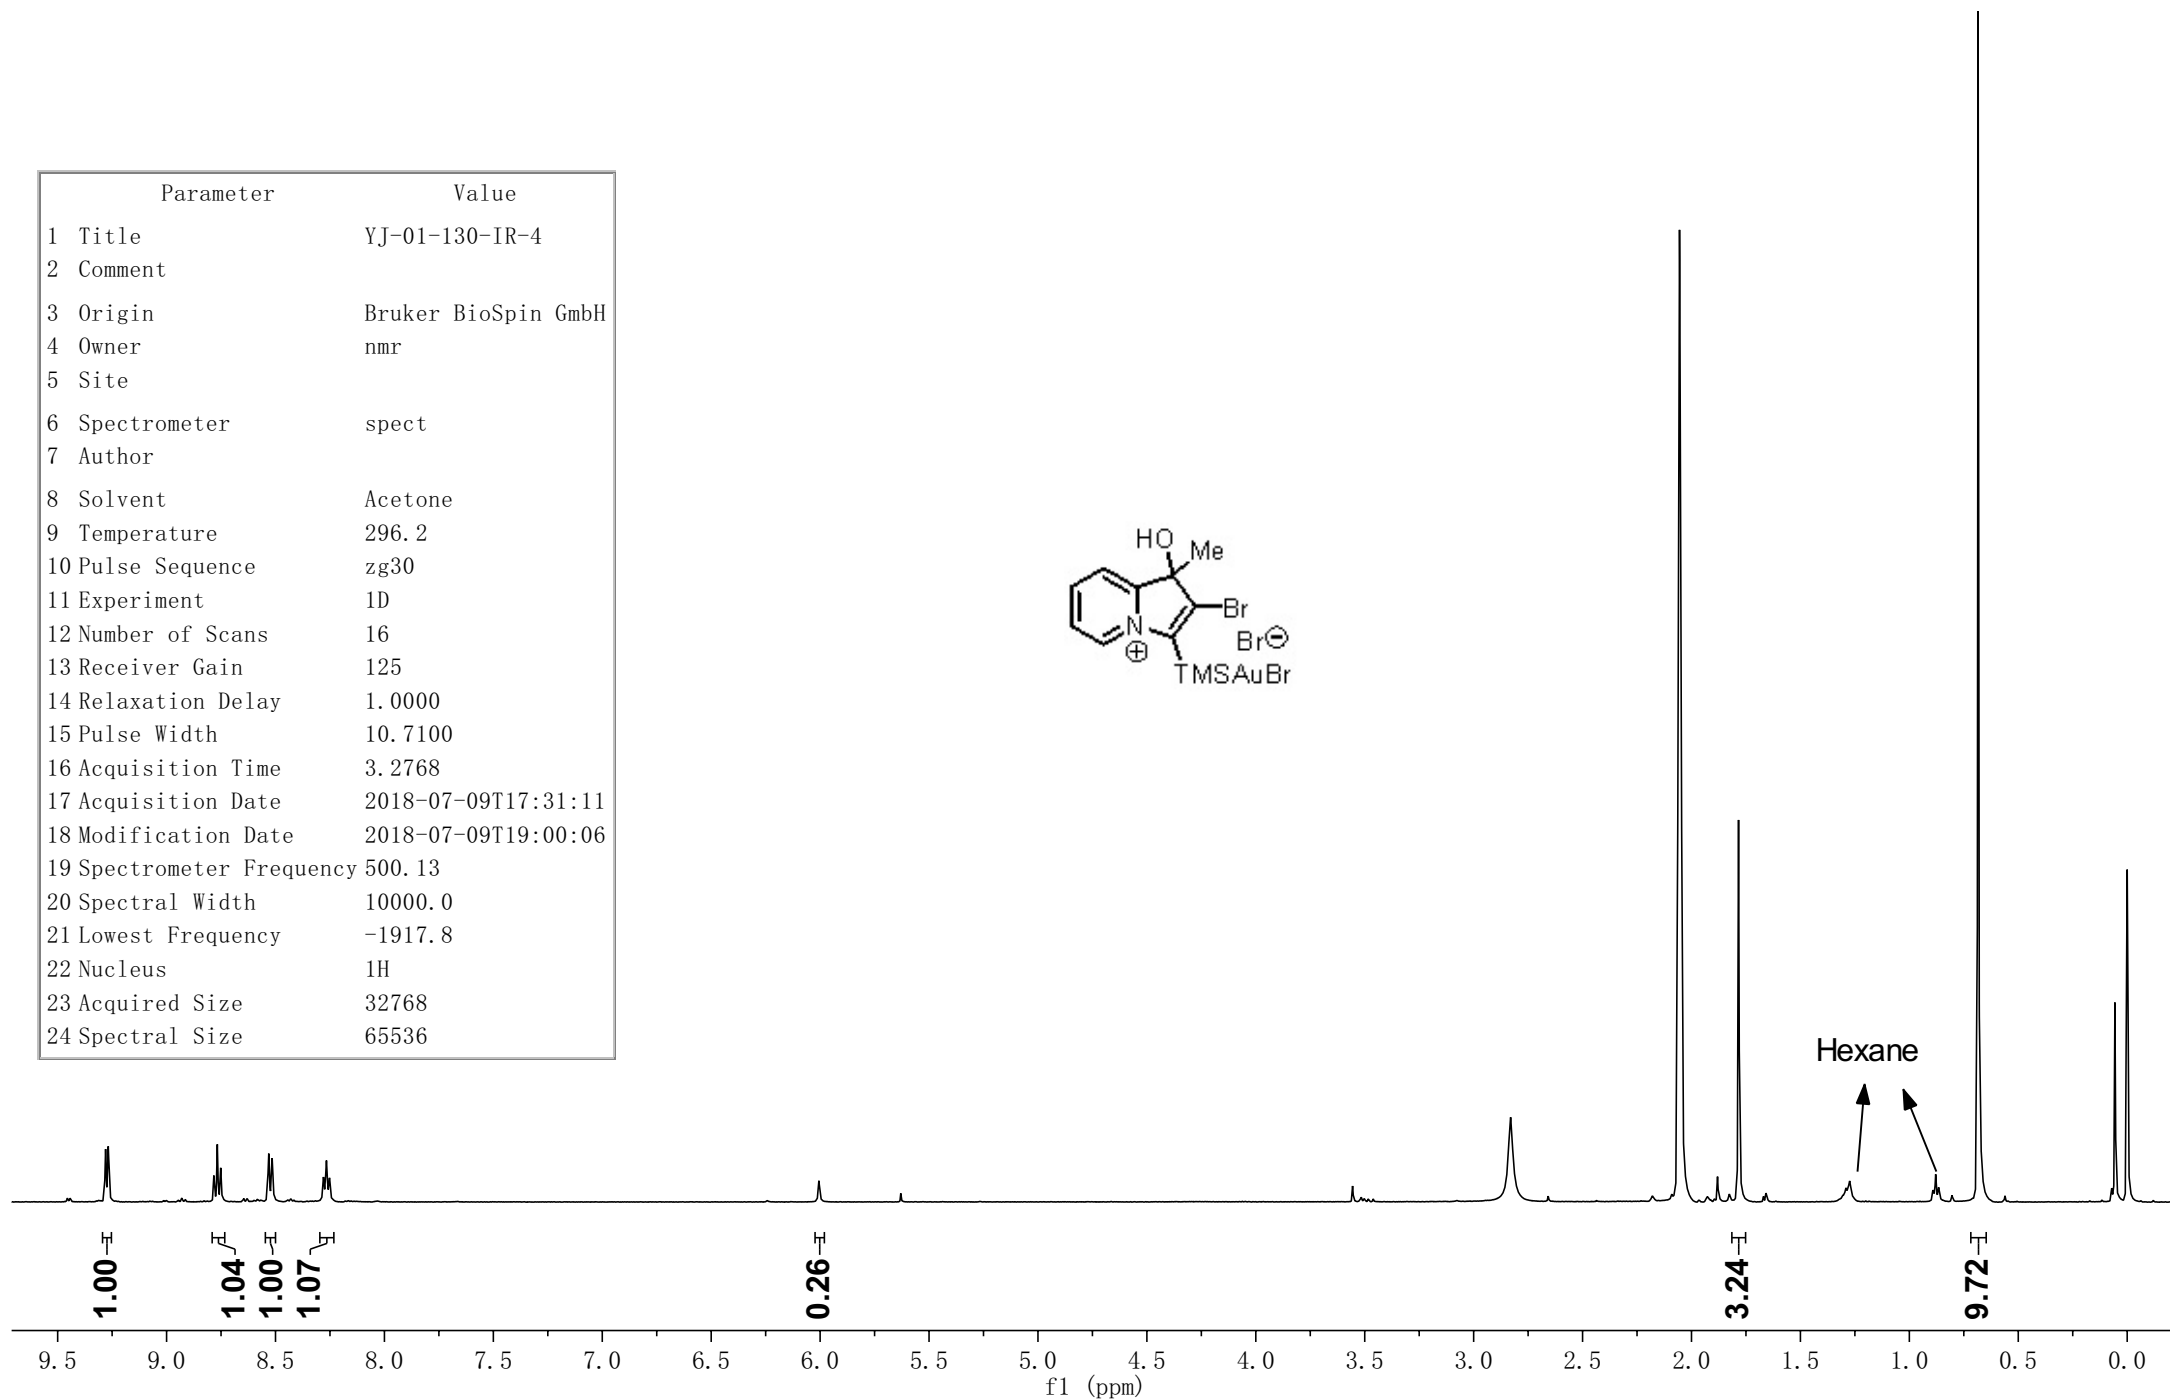

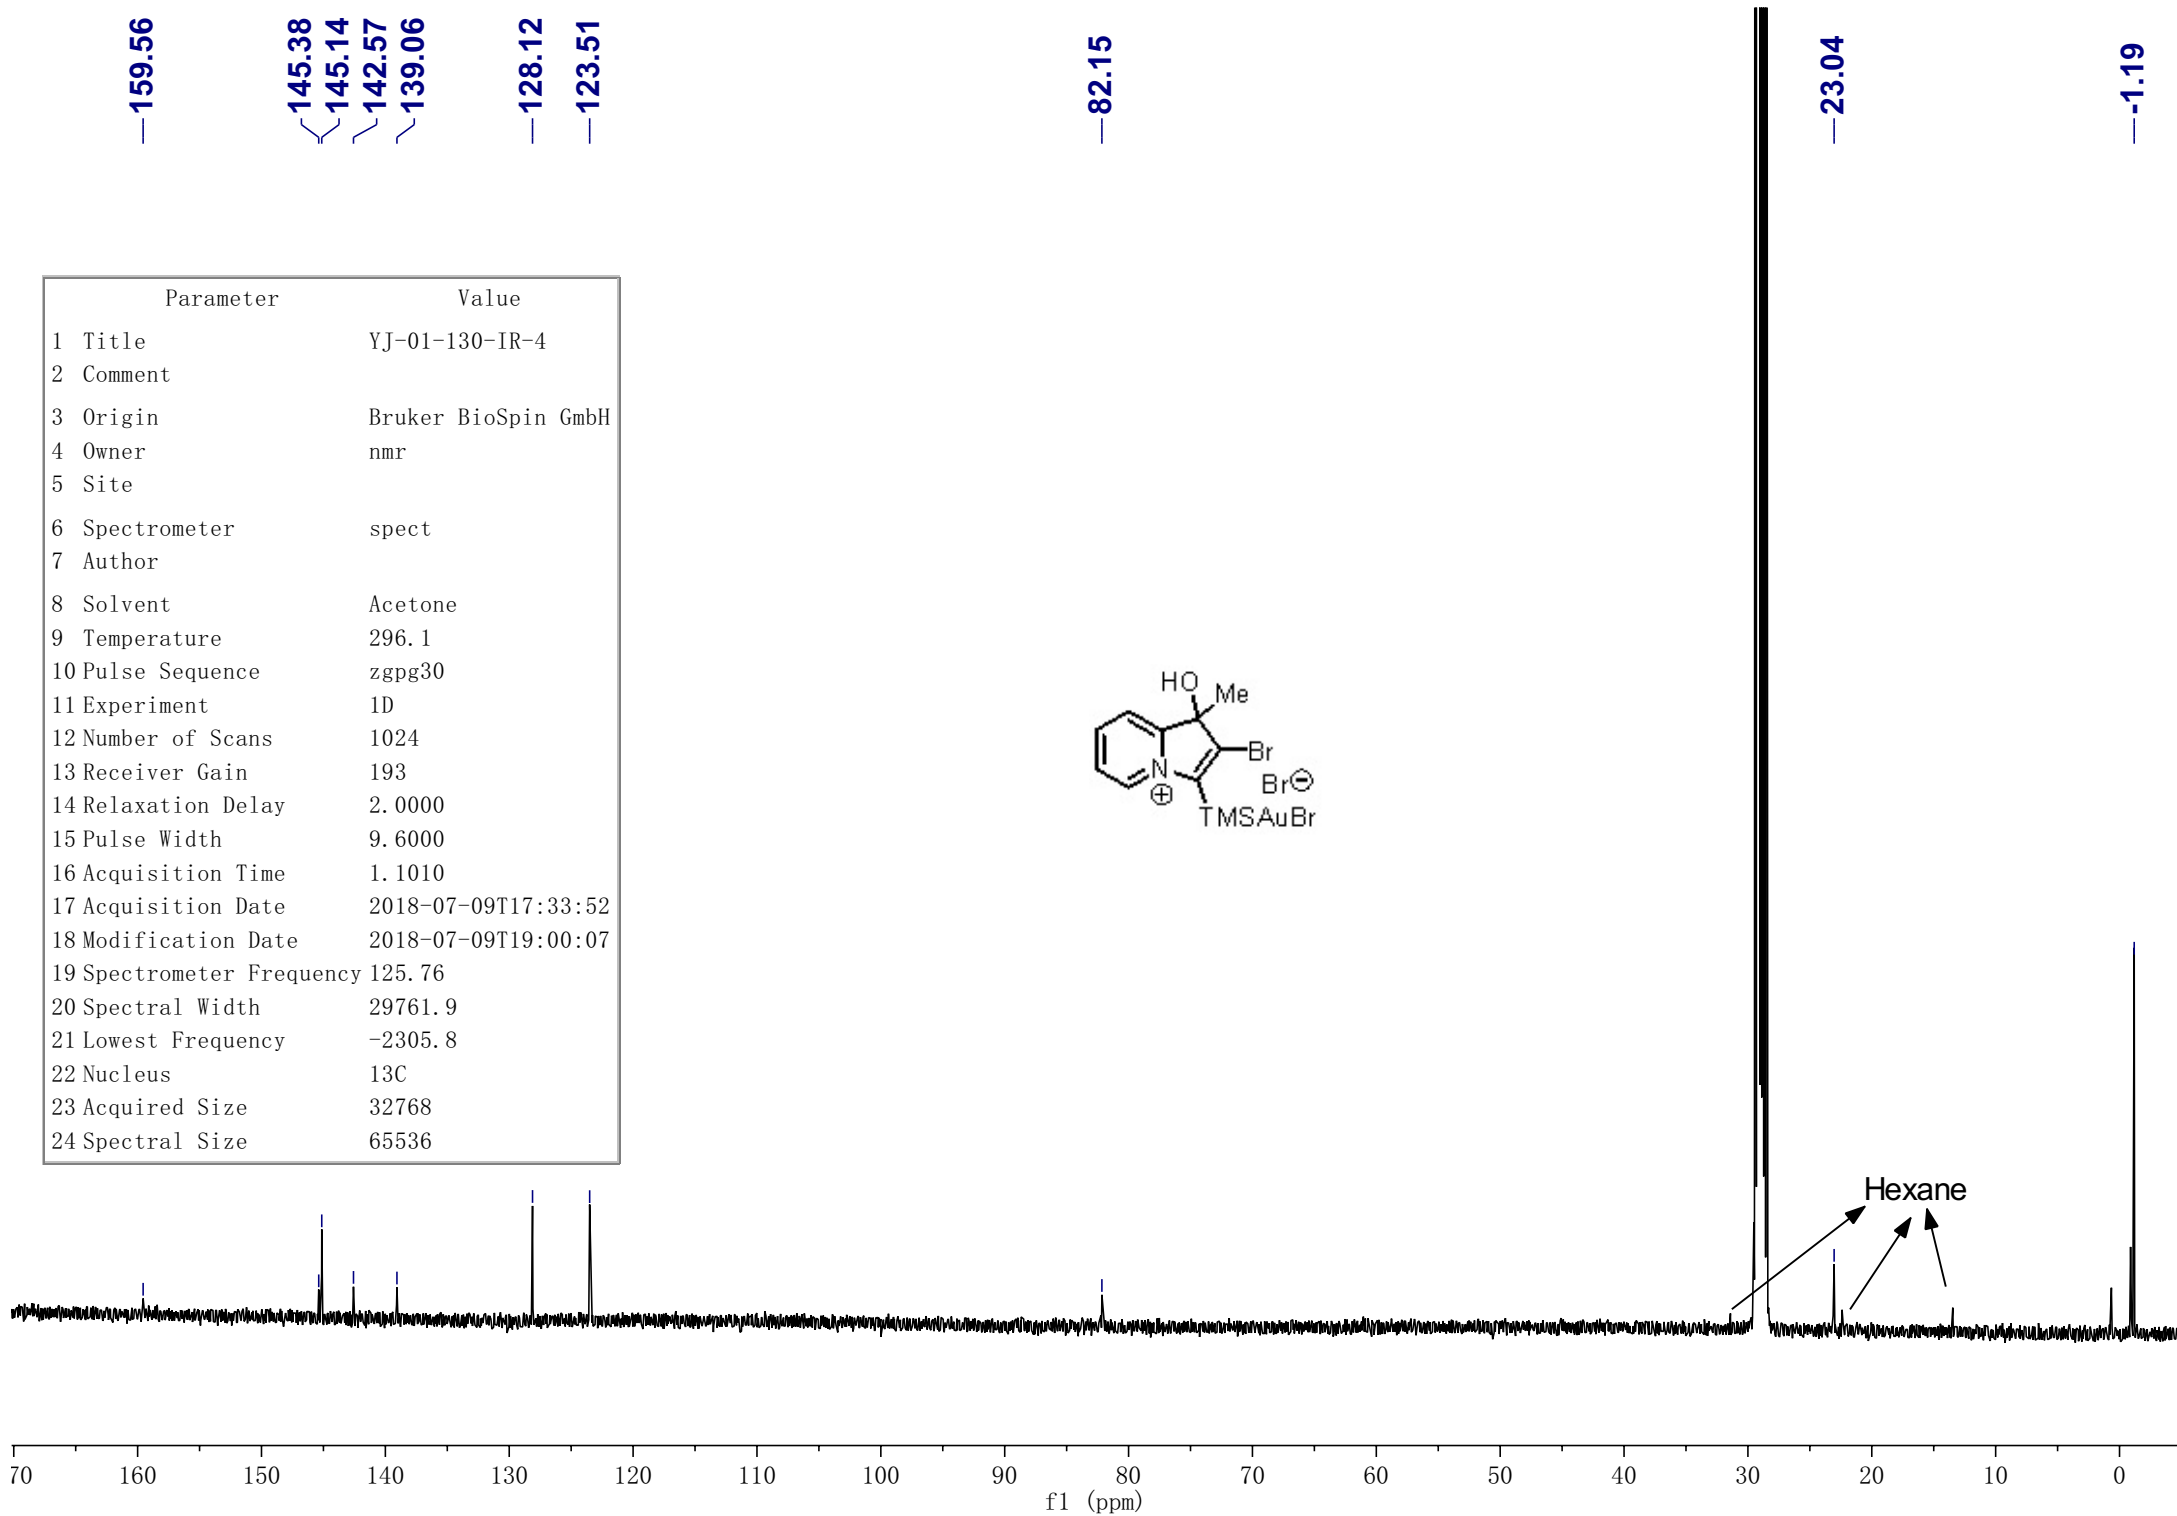

| Parameter                 | Value               |
|---------------------------|---------------------|
| 1 Title                   | YJ-01-69-IR         |
| 2 Comment                 |                     |
| 3 Origin                  | Bruker BioSpin GmbH |
| 4 Owner                   | nmr                 |
| 5 Site                    |                     |
| 6 Spectrometer            | spect               |
| 7 Author                  |                     |
| 8 Solvent                 | DMSO                |
| 9 Temperature             | 296.1               |
| 10 Pulse Sequence         | zg30                |
| 11 Experiment             | 1D                  |
| 12 Number of Scans        | 8                   |
| 13 Receiver Gain          | 78                  |
| 14 Relaxation Delay       | 1.0000              |
| 15 Pulse Width            | 10.7100             |
| 16 Acquisition Time       | 3.2768              |
| 17 Acquisition Date       | 2018-08-25T18:23:10 |
| 18 Modification Date      | 2018-08-25T19:57:53 |
| 19 Spectrometer Frequency | 500.13              |
| 20 Spectral Width         | 10000.0             |
| 21 Lowest Frequency       | -1911.5             |
| 22 Nucleus                | <sup>1</sup> H      |
| 23 Acquired Size          | 32768               |
| 24 Spectral Size          | 65536               |

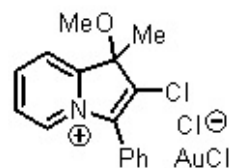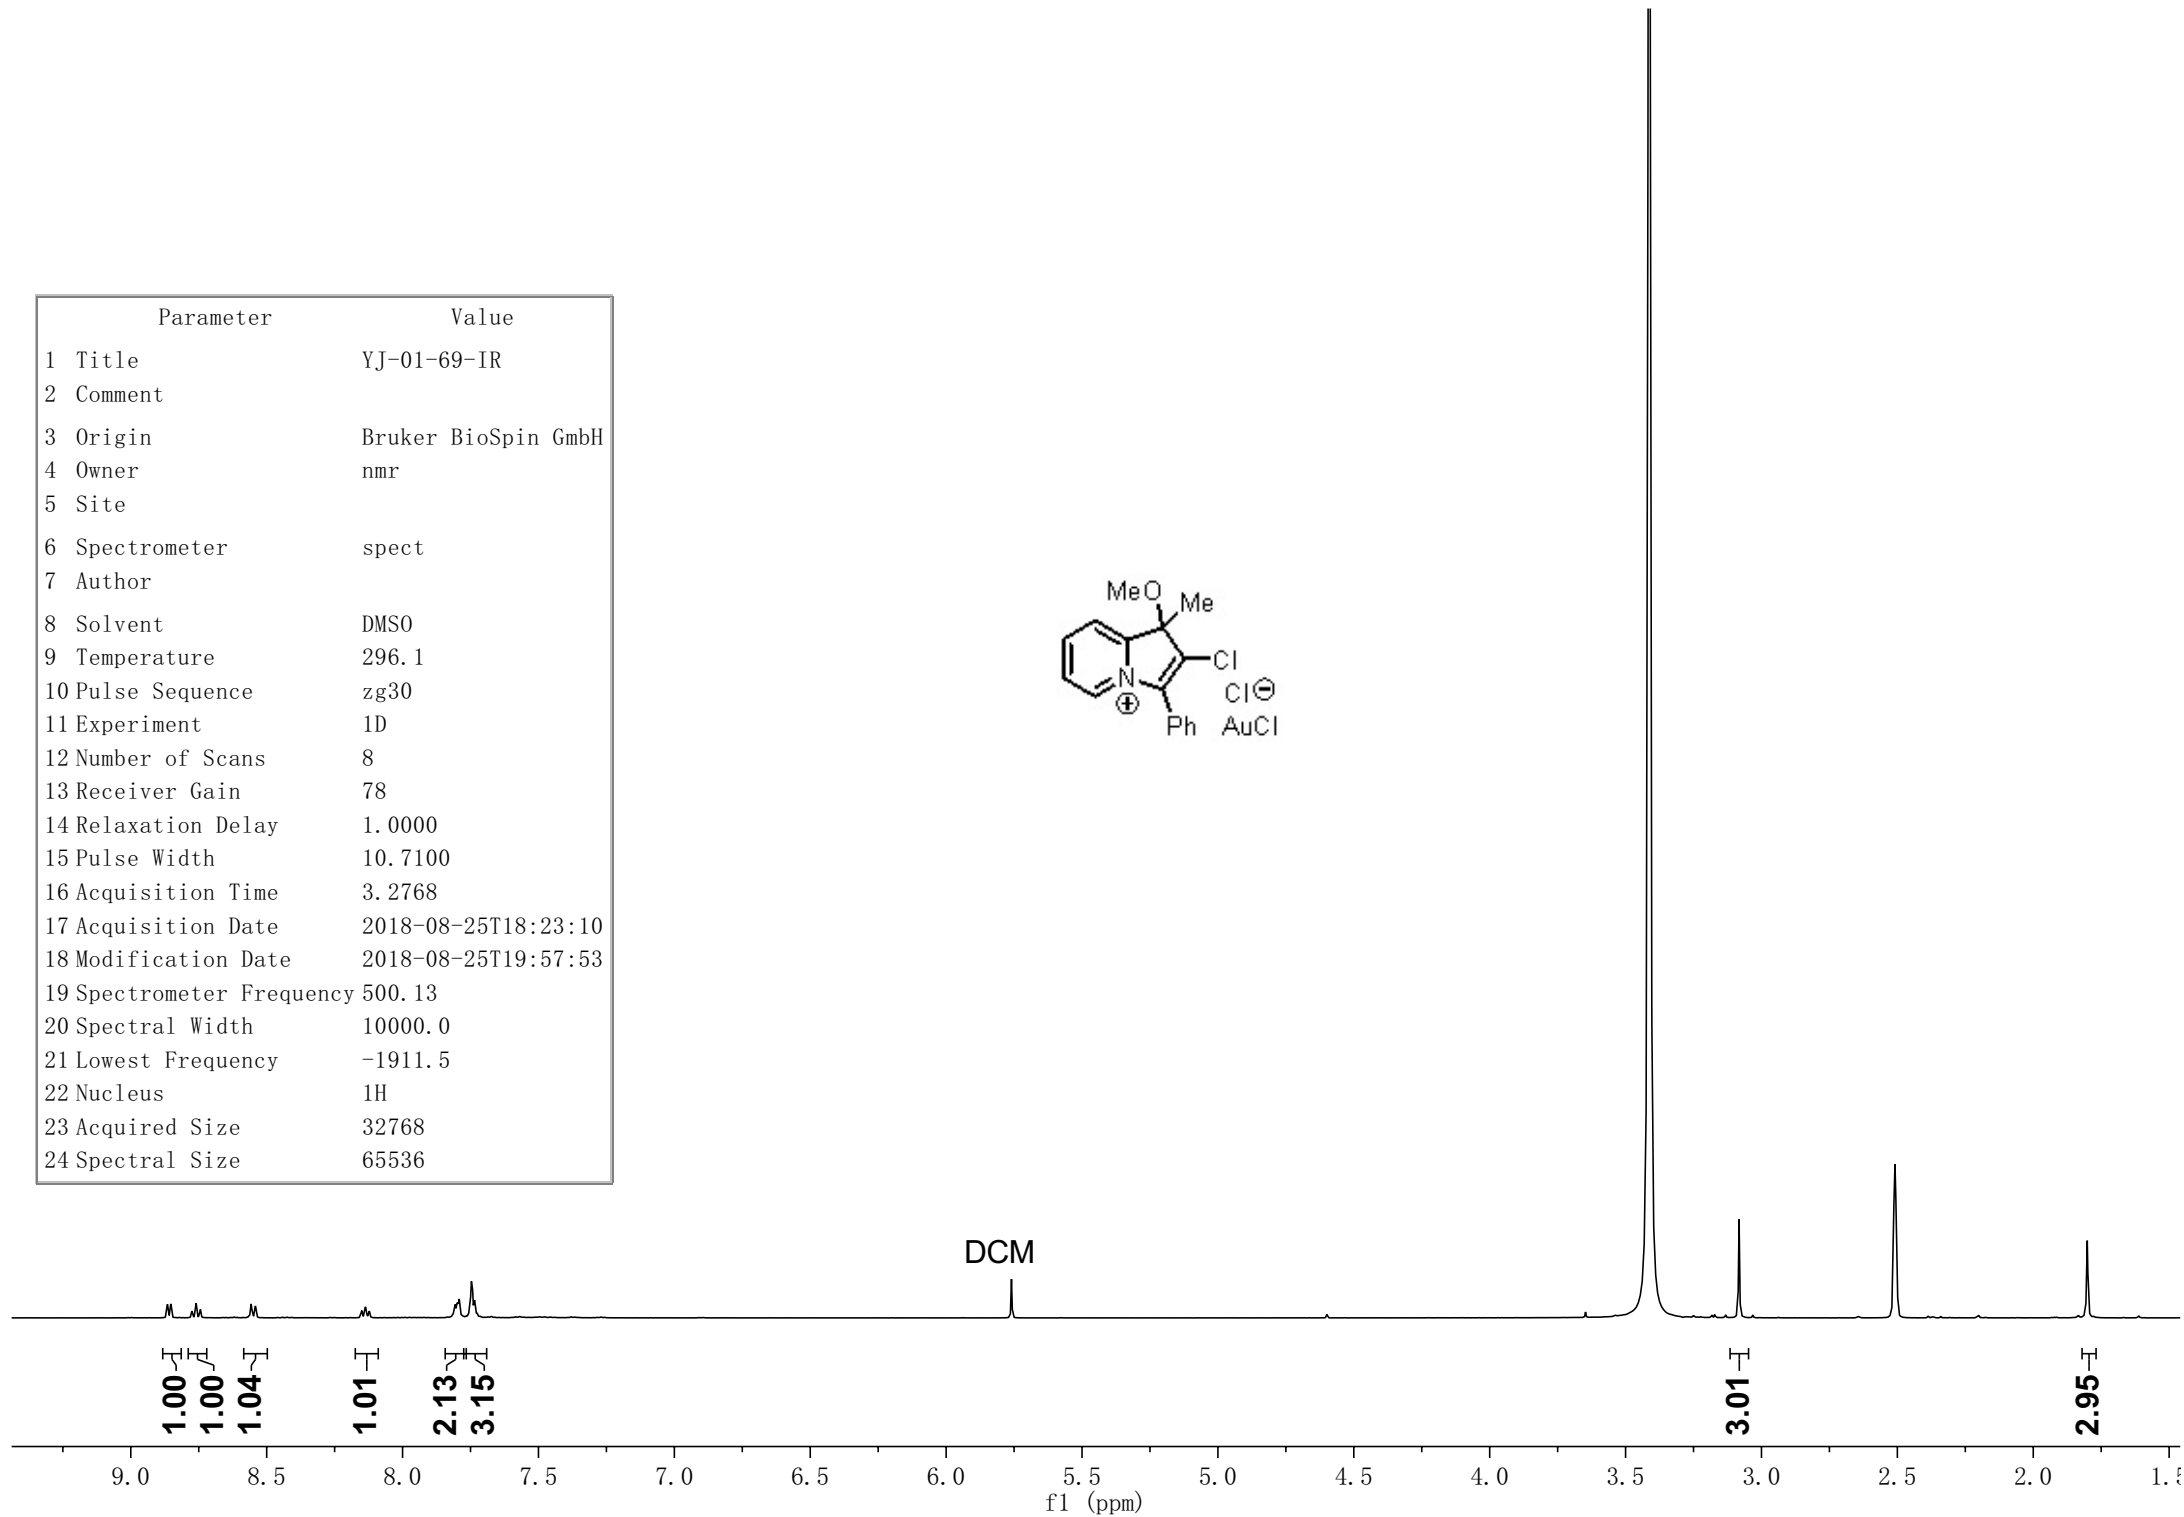

—154.26  
—146.45  
139.98  
138.72  
134.76  
132.37  
131.13  
130.01  
128.72  
123.91  
123.12

—85.48

—53.80

—22.11

| Parameter                 | Value               |
|---------------------------|---------------------|
| 1 Title                   | YJ-01-69-IR         |
| 2 Comment                 |                     |
| 3 Origin                  | Bruker BioSpin GmbH |
| 4 Owner                   | nmr                 |
| 5 Site                    |                     |
| 6 Spectrometer            | spect               |
| 7 Author                  |                     |
| 8 Solvent                 | DMSO                |
| 9 Temperature             | 296.1               |
| 10 Pulse Sequence         | zgpg30              |
| 11 Experiment             | 1D                  |
| 12 Number of Scans        | 611                 |
| 13 Receiver Gain          | 193                 |
| 14 Relaxation Delay       | 2.0000              |
| 15 Pulse Width            | 9.6000              |
| 16 Acquisition Time       | 1.1010              |
| 17 Acquisition Date       | 2018-08-25T18:25:23 |
| 18 Modification Date      | 2018-08-25T19:57:53 |
| 19 Spectrometer Frequency | 125.76              |
| 20 Spectral Width         | 29761.9             |
| 21 Lowest Frequency       | -2305.8             |
| 22 Nucleus                | 13C                 |
| 23 Acquired Size          | 32768               |
| 24 Spectral Size          | 65536               |

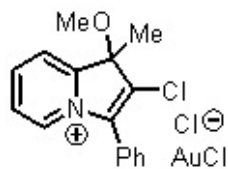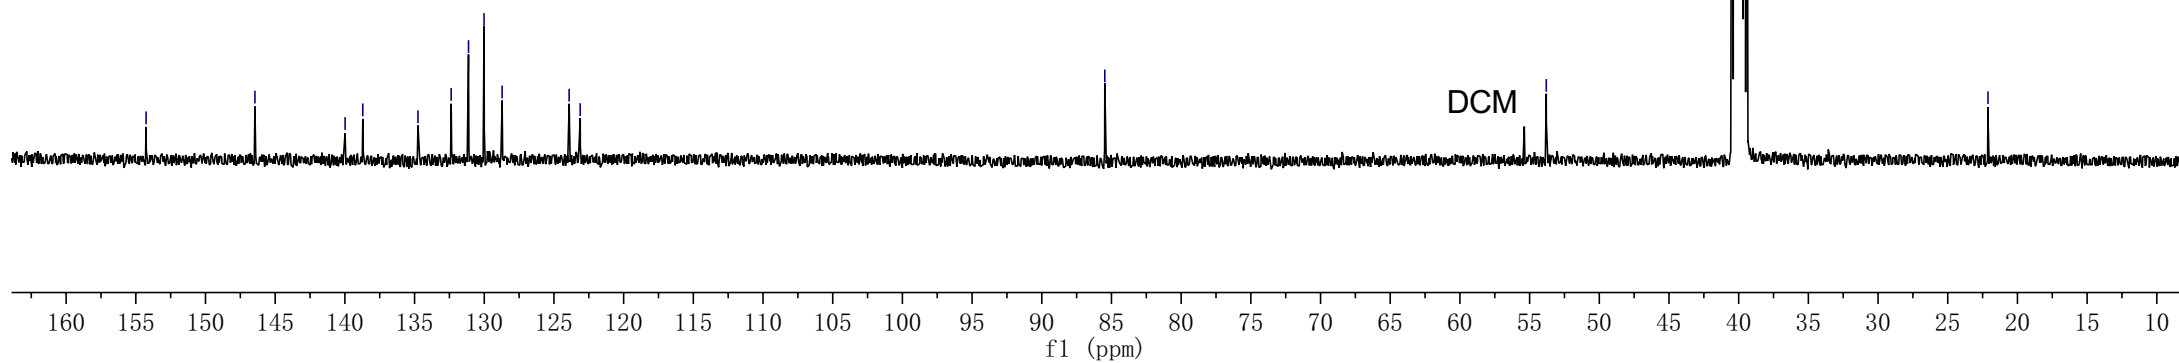

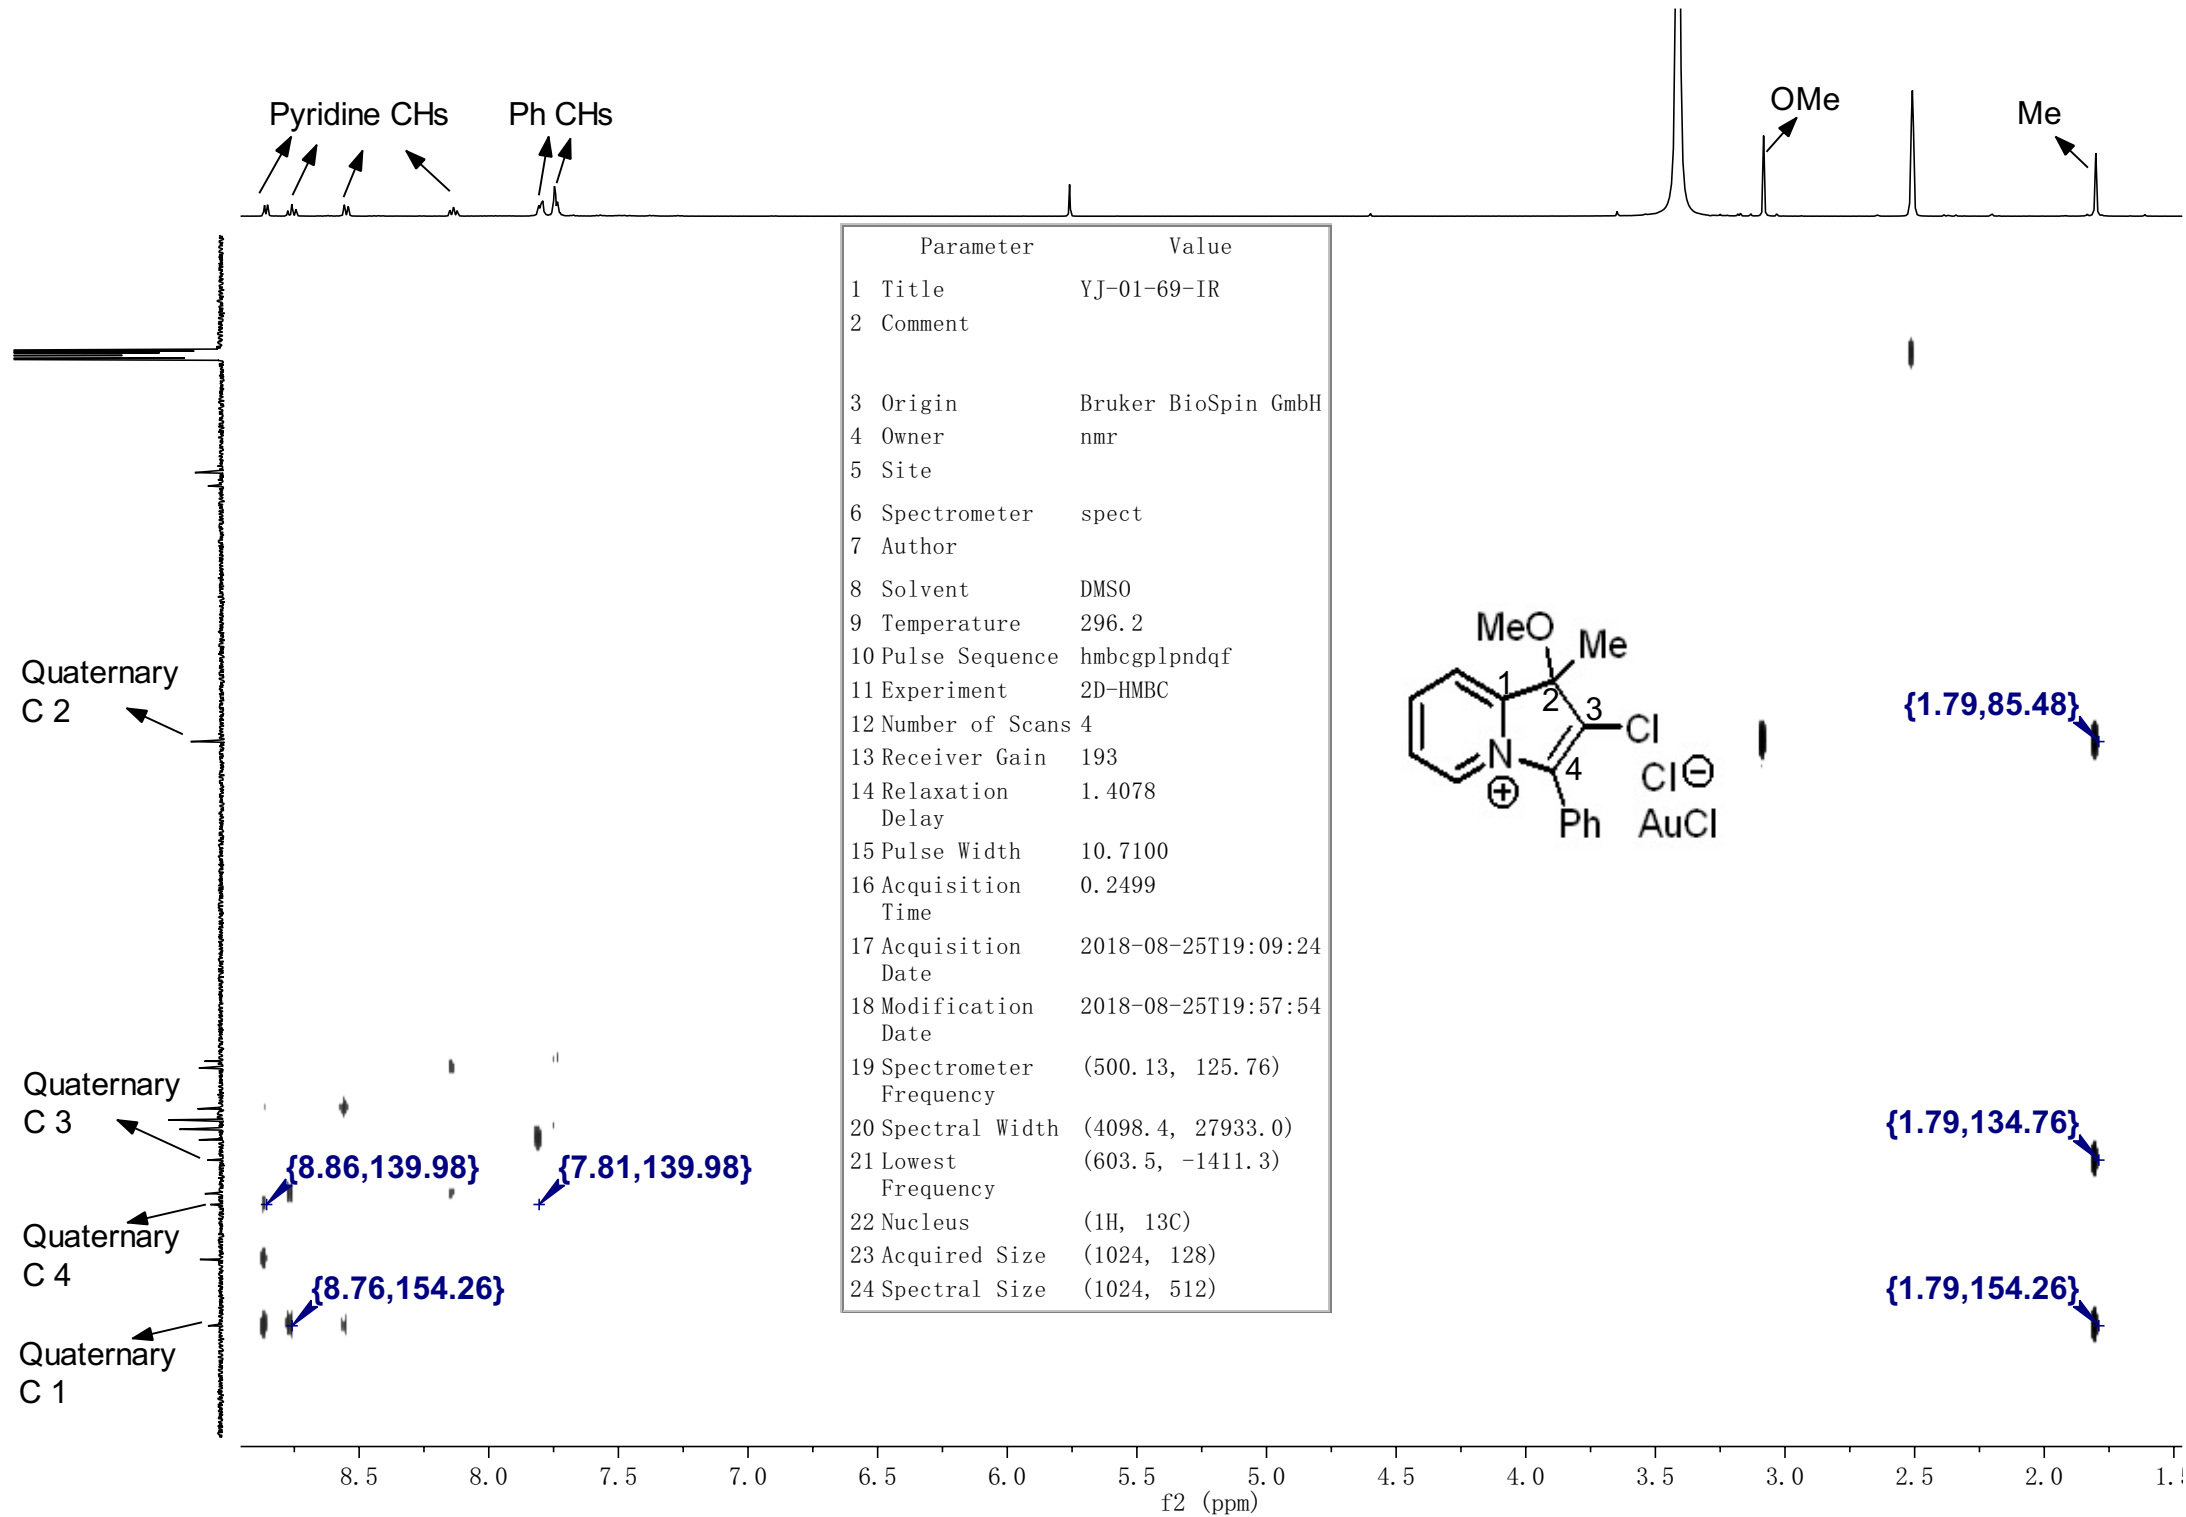

| Parameter                 | Value               |
|---------------------------|---------------------|
| 1 Title                   | YJ-01-129-IR        |
| 2 Comment                 |                     |
| 3 Origin                  | Bruker BioSpin GmbH |
| 4 Owner                   | nmr                 |
| 5 Site                    |                     |
| 6 Spectrometer            | spect               |
| 7 Author                  |                     |
| 8 Solvent                 | DMSO                |
| 9 Temperature             | 296.1               |
| 10 Pulse Sequence         | zg30                |
| 11 Experiment             | 1D                  |
| 12 Number of Scans        | 8                   |
| 13 Receiver Gain          | 78                  |
| 14 Relaxation Delay       | 1.0000              |
| 15 Pulse Width            | 10.7100             |
| 16 Acquisition Time       | 3.2768              |
| 17 Acquisition Date       | 2018-08-25T19:27:40 |
| 18 Modification Date      | 2018-08-25T19:57:53 |
| 19 Spectrometer Frequency | 500.13              |
| 20 Spectral Width         | 10000.0             |
| 21 Lowest Frequency       | -1911.5             |
| 22 Nucleus                | <sup>1</sup> H      |
| 23 Acquired Size          | 32768               |
| 24 Spectral Size          | 65536               |

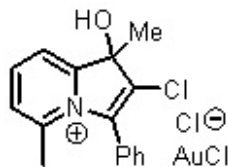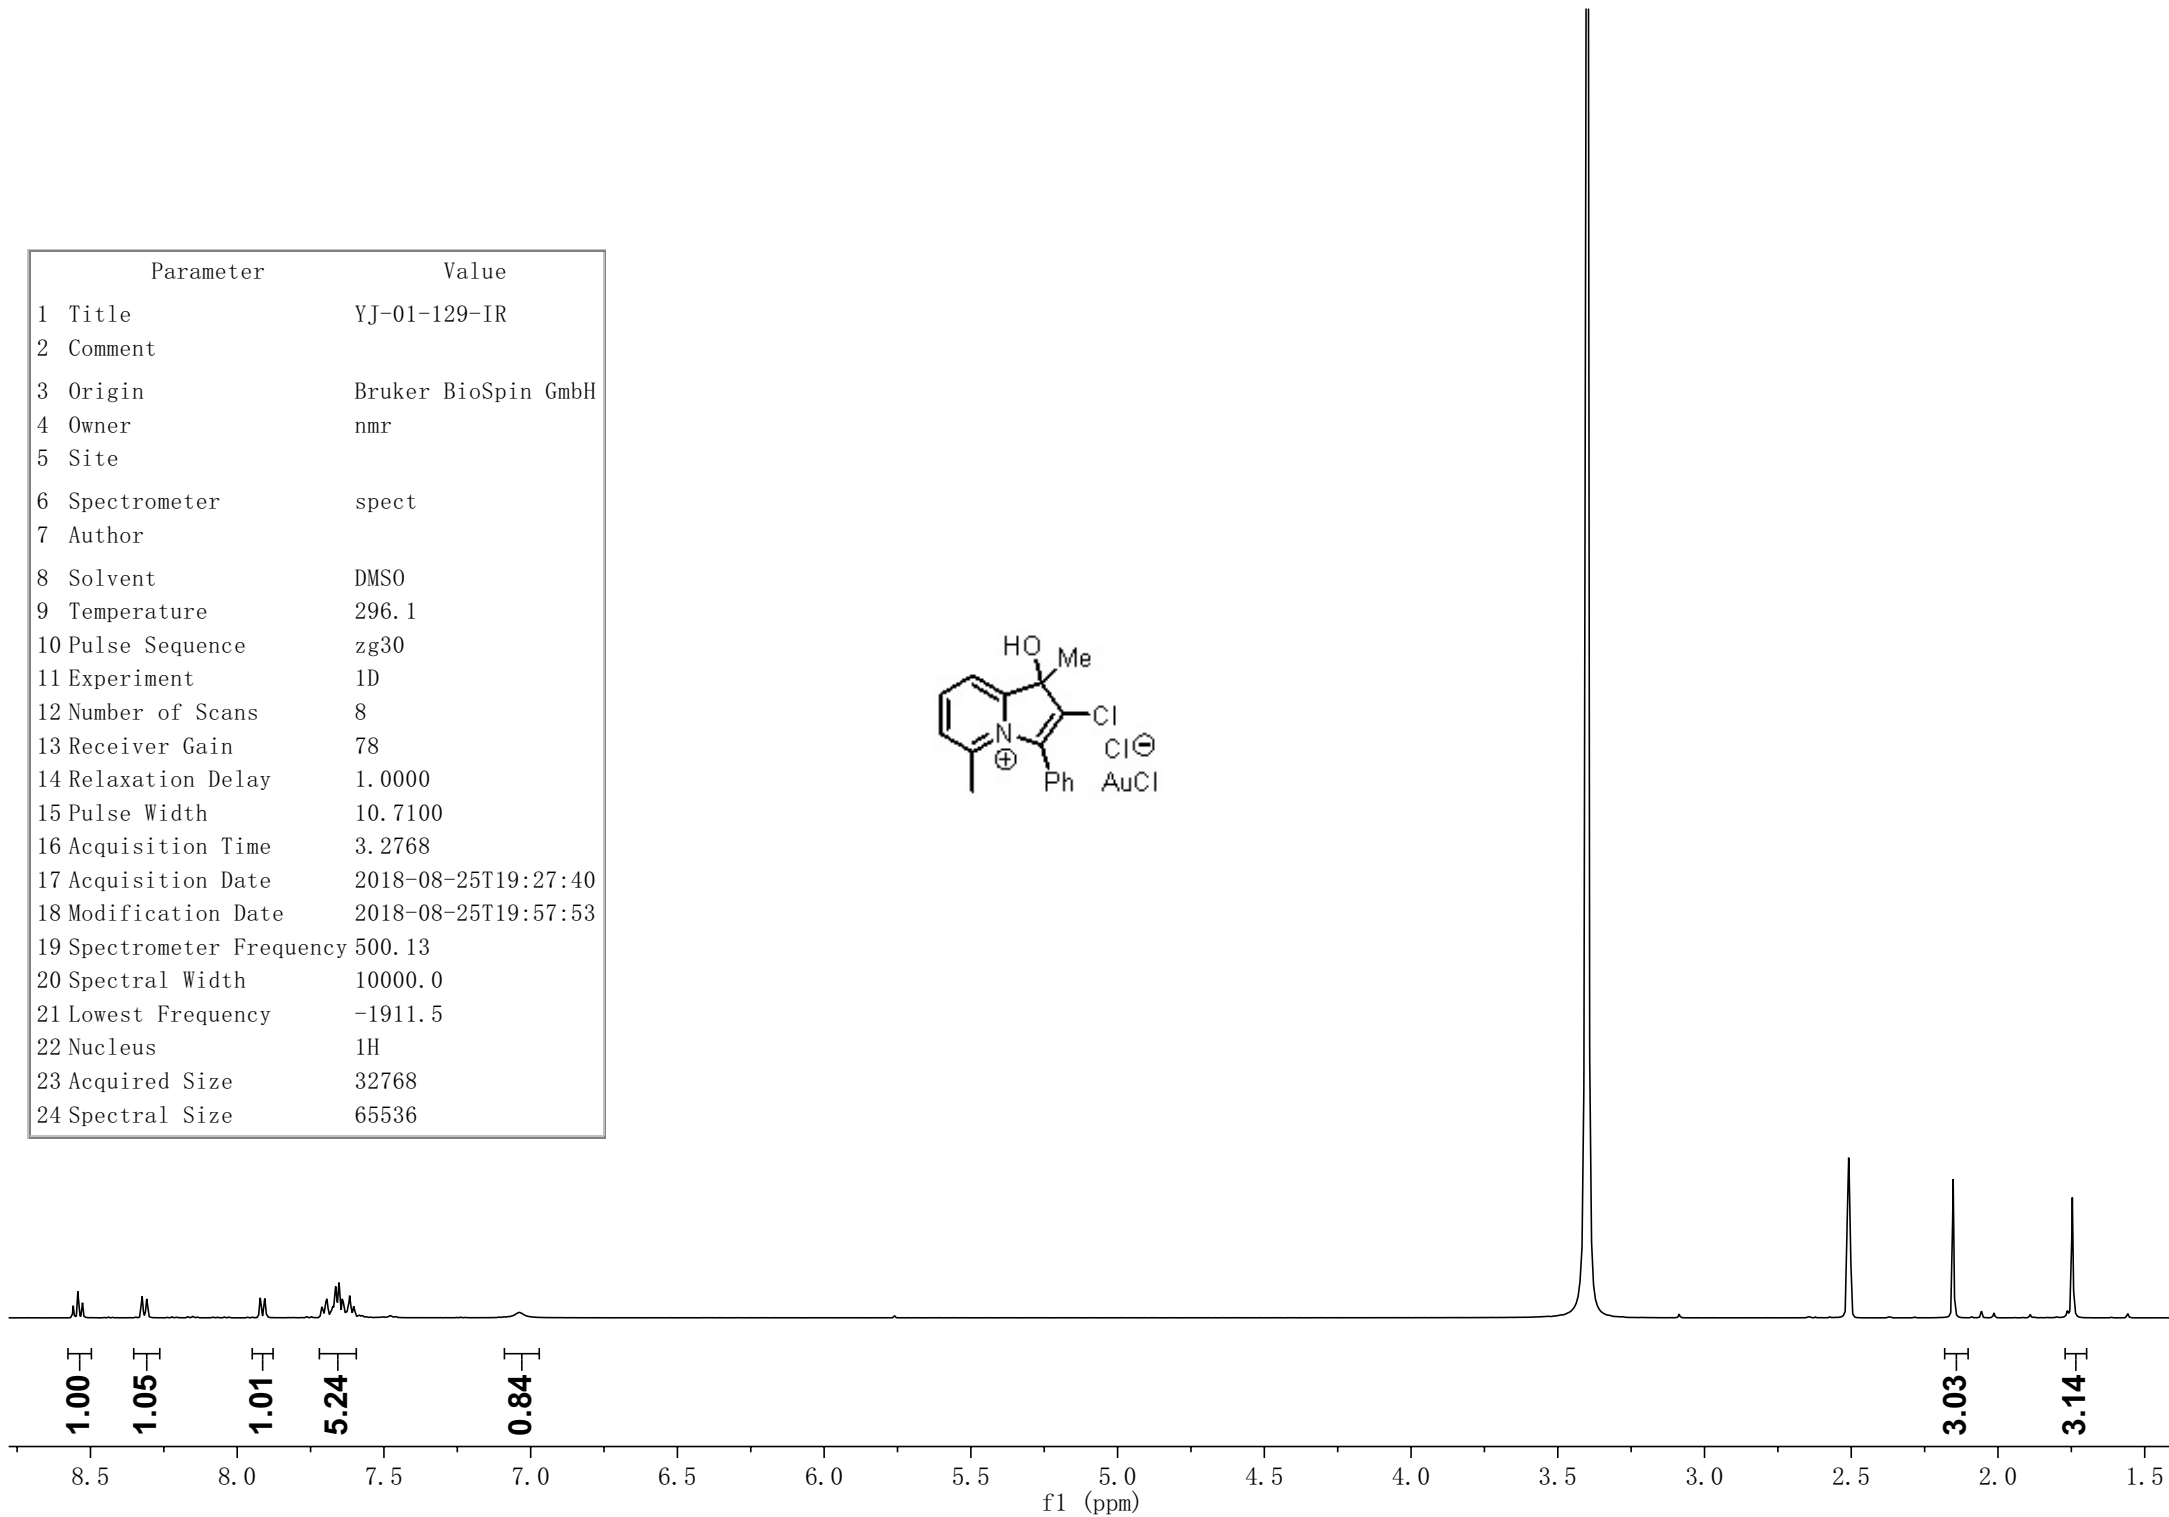

—159.84

—151.96

145.24

140.84

139.02

131.80

131.18

131.07

131.04

129.85

129.72

127.97

—121.25

—78.27

23.05

22.14

|    | Parameter              | Value               |
|----|------------------------|---------------------|
| 1  | Title                  | YJ-01-129-IR        |
| 2  | Comment                |                     |
| 3  | Origin                 | Bruker BioSpin GmbH |
| 4  | Owner                  | nmr                 |
| 5  | Site                   |                     |
| 6  | Spectrometer           | spect               |
| 7  | Author                 |                     |
| 8  | Solvent                | DMSO                |
| 9  | Temperature            | 296.2               |
| 10 | Pulse Sequence         | zgpg30              |
| 11 | Experiment             | 1D                  |
| 12 | Number of Scans        | 127                 |
| 13 | Receiver Gain          | 193                 |
| 14 | Relaxation Delay       | 2.0000              |
| 15 | Pulse Width            | 9.6000              |
| 16 | Acquisition Time       | 1.1010              |
| 17 | Acquisition Date       | 2018-08-25T19:30:18 |
| 18 | Modification Date      | 2018-08-25T19:57:53 |
| 19 | Spectrometer Frequency | 125.76              |
| 20 | Spectral Width         | 29761.9             |
| 21 | Lowest Frequency       | -2305.8             |
| 22 | Nucleus                | 13C                 |
| 23 | Acquired Size          | 32768               |
| 24 | Spectral Size          | 65536               |

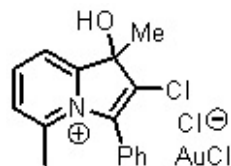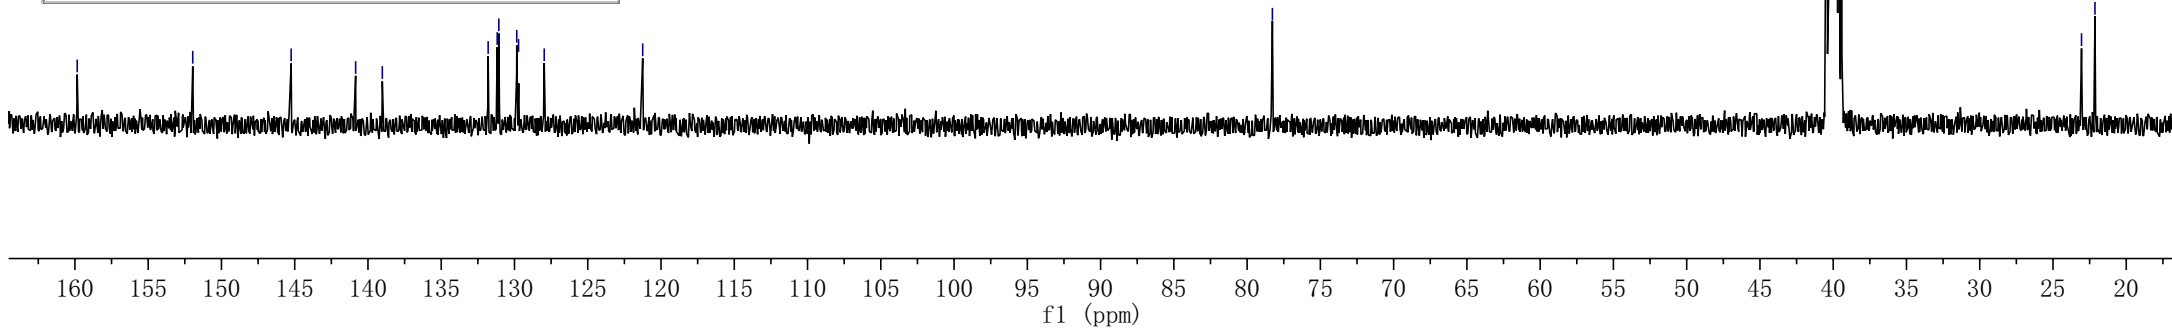

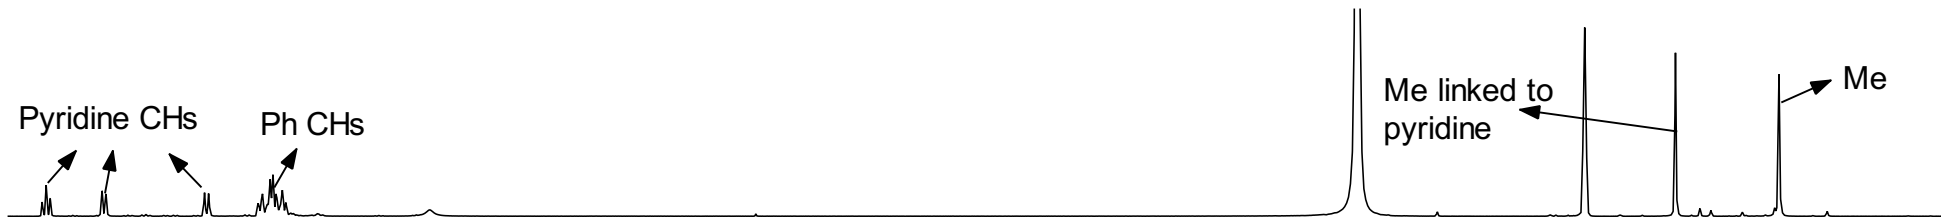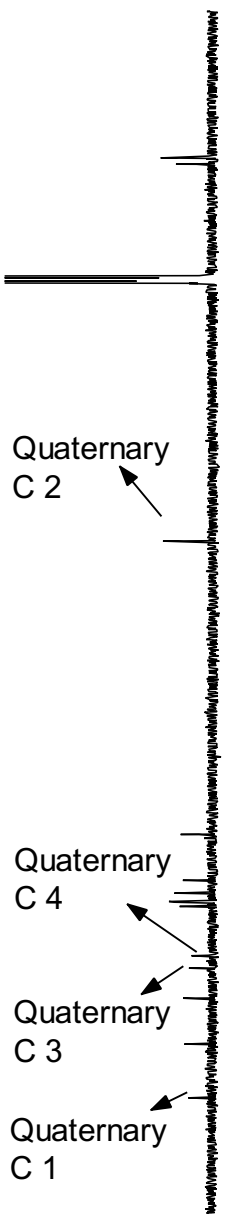

| Parameter                 | Value               |
|---------------------------|---------------------|
| 1 Title                   | YJ-01-129-IR        |
| 2 Comment                 |                     |
| 3 Origin                  | Bruker BioSpin GmbH |
| 4 Owner                   | nmr                 |
| 5 Site                    |                     |
| 6 Spectrometer            | spect               |
| 7 Author                  |                     |
| 8 Solvent                 | DMSO                |
| 9 Temperature             | 296.2               |
| 10 Pulse Sequence         | hmbcgplpndqf        |
| 11 Experiment             | 2D-HMBC             |
| 12 Number of Scans        | 4                   |
| 13 Receiver Gain          | 193                 |
| 14 Relaxation Delay       | 1.4037              |
| 15 Pulse Width            | 10.7100             |
| 16 Acquisition Time       | 0.2540              |
| 17 Acquisition Date       | 2018-08-27T18:38:48 |
| 18 Modification Date      | 2018-08-27T20:17:56 |
| 19 Spectrometer Frequency | (500.13, 125.76)    |
| 20 Spectral Width         | (4032.3, 27933.0)   |
| 21 Lowest Frequency       | (523.8, -1411.3)    |
| 22 Nucleus                | (1H, 13C)           |
| 23 Acquired Size          | (1024, 128)         |
| 24 Spectral Size          | (1024, 512)         |

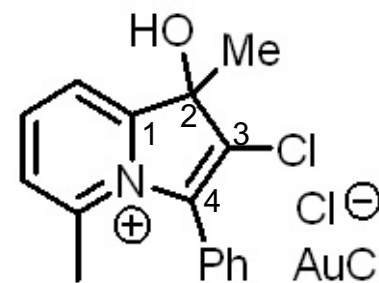

{7.71,139.04}

{2.16,131.05}

{1.75,140.84}

{2.15,151.96}

{1.75,159.85}

f2 (ppm)
